# Supplementary material
Source: publisher figshare collection journal article supplement (https://frontiersin.figshare.com/ndownloader/files/28559094)
Supplement: Supplementary file 1 [file 28559094]

RouteDataID	StateNum	Route	Year	Longitude	Latitude	PE	Richness	PD	Range.rarity
6166857	2	6	1966	-86.6855493	34.5012877	0.047009118	52	1766.908215	0.006145218
6166861	2	8	1966	-85.7110414	34.0278089	0.05731182	61	1974.4392	0.007708888
6166865	2	11	1966	-85.7518379	33.6257237	0.05006398	55	1780.245849	0.006805639
6166869	2	16	1966	-87.5888357	33.8481773	0.054362935	54	1666.484779	0.007384497
6166877	2	24	1966	-86.2754989	32.1312407	0.041086052	48	1685.293969	0.005431242
6166879	2	26	1966	-86.1307777	32.5890245	0.039417519	46	1629.146194	0.005224731
6166883	2	31	1966	-85.2112631	31.0081277	0.070728217	39	1615.994724	0.004859692
6166887	2	34	1966	-86.6131969	31.4439507	0.041631266	46	1678.945332	0.004847321
6166891	2	36	1966	-87.2090516	31.7399574	0.071081082	61	1911.599275	0.009176986
6166895	2	40	1966	-88.1125479	30.2540327	0.167257347	56	2110.203017	0.019757798
6166899	18	2	1966	-72.9096309	41.6976407	0.038684085	57	1569.666875	0.006262551
6166904	21	2	1966	-75.5873207	39.7518831	0.040828359	45	1694.868482	0.004224154
6166908	21	5	1966	-75.4593569	39.0295357	0.054212294	52	1687.432488	0.009363996
6166911	21	7	1966	-75.2351089	38.6735427	0.054071986	62	1810.803331	0.007503287
6166919	25	3	1966	-86.4809129	30.5193157	0.059106682	40	1424.671451	0.006399773
6166923	25	6	1966	-84.0413094	30.5950194	0.058225186	52	1724.941262	0.007620191
6166926	25	11	1966	-83.3782062	29.6686989	0.077985981	43	1878.486906	0.006001535
6166929	25	13	1966	-82.2630299	29.5468457	0.095906025	57	2151.947832	0.010775821
6166934	25	16	1966	-82.5050049	28.0363157	0.08287749	46	1901.523501	0.009133169
6167168	2	2	1966	-87.1912919	34.6386747	0.045512241	51	1636.310305	0.005764199
6167171	2	4	1966	-87.0592352	34.0297881	0.044109465	49	1356.747943	0.006656601
6167174	2	5	1966	-86.4934089	34.2016687	0.038364054	47	1646.85318	0.004617091
6167178	2	12	1966	-85.7511714	33.6076572	0.051239495	48	1335.351167	0.007836368
6167181	2	13	1966	-86.1153789	33.8116977	0.06759038	62	1580.576754	0.010210688
6167184	2	14	1966	-86.6010915	33.4549551	0.063653391	62	1774.424488	0.009329243
6167187	2	15	1966	-86.8721632	33.6822947	0.063985158	65	1938.608366	0.008975998
6167190	2	20	1966	-88.3172665	32.1307226	0.07377471	62	2054.476715	0.009078512
6167197	2	23	1966	-87.5153953	32.7846996	0.062748665	57	1761.854749	0.008253869
6167202	2	25	1966	-86.7017714	32.6594297	0.051026891	52	1554.470086	0.007876738
6167207	2	30	1966	-85.5895835	31.3388298	0.034334276	37	1420.839555	0.003750468
6167211	2	32	1966	-85.8156189	31.7165541	0.039785252	42	1492.626724	0.005018669
6167214	2	33	1966	-86.250378	31.5859083	0.045083935	51	1771.671698	0.005818205
6167217	21	1	1966	-75.6860679	39.5003037	0.047141316	59	1787.614964	0.006735979
6167219	21	3	1966	-75.5366119	38.9594417	0.09559071	67	2259.700551	0.012654397
6167220	21	6	1966	-75.1803229	38.5337387	0.05942958	63	1868.39181	0.008093062
6167223	21	10	1966	-75.2899489	38.7480537	0.053460125	54	1741.822348	0.006323373
6167225	25	2	1966	-86.2758321	30.3755433	0.134935982	41	1788.097184	0.014570951
6167227	25	4	1966	-85.1334541	30.5288404	0.07321974	51	1730.008023	0.00889435
6167228	25	14	1966	-82.394802	29.1916199	0.058045742	52	2033.791195	0.007272763
6167230	25	17	1966	-82.1186659	27.4438745	0.102553532	54	2043.194559	0.012400871
6167232	25	23	1966	-81.9816829	28.5723877	0.070214212	37	1670.911518	0.007303272
6167233	25	33	1966	-80.4312659	26.0628347	0.102023942	42	1961.12804	0.013080864
6167235	25	35	1966	-80.7663639	25.6579667	0.074239877	38	1740.448596	0.007715581
6167237	27	5	1966	-82.3558447	31.9696201	0.075286255	52	1787.572341	0.006874335
6167239	27	7	1966	-83.2438622	31.7059705	0.065292995	42	1669.71334	0.005328652
6167241	27	15	1966	-83.9907256	33.0058447	0.042343754	48	1579.70625	0.005871875
6167243	27	20	1966	-83.1735057	33.7540376	0.052228707	54	1551.129522	0.007421036
6167245	27	27	1966	-84.7868559	34.0545254	0.052246114	58	1736.51144	0.007177431
6167479	2	28	1966	-85.2044589	32.8854647	0.057215517	54	1683.860563	0.008349106
6167483	2	38	1966	-87.1203132	31.3180673	0.053008484	47	1541.838344	0.007743634
6167487	2	42	1966	-87.6833489	30.3701137	0.048598766	41	1431.652425	0.00568647
6167490	21	8	1966	-75.4329779	38.5040567	0.067864322	66	2215.001106	0.009020099
6167493	21	9	1966	-75.0612969	38.5804577	0.091722055	65	1989.264802	0.024489775
6167496	25	28	1966	-80.9676799	25.7510497	0.038129879	35	1553.668839	0.006808307
6167504	34	39	1966	-90.8395322	39.3609974	0.044982948	59	1849.617837	0.005972452
6167508	34	56	1966	-88.1676148	38.70688	0.039586214	51	1614.089007	0.005325418
6167510	39	1	1966	-83.7017979	36.6082857	0.048422761	58	1591.34887	0.007566266
6167514	39	20	1966	-84.5585649	37.8823347	0.042265025	49	1696.281638	0.005776696
6167518	39	21	1966	-84.6612332	37.390468	0.048495514	55	1637.673393	0.006494893
6167662	2	7	1966	-86.2030371	34.8680404	0.050790723	55	1851.086236	0.005988066
6167664	2	9	1966	-85.9267589	34.3039507	0.06115758	67	2078.101293	0.008313986
6167665	2	10	1966	-85.9258408	33.1913463	0.040691718	43	1521.496268	0.004822046
6167668	2	17	1966	-87.0044623	33.5263185	0.065142811	64	1913.197275	0.009497271
6167671	2	19	1966	-88.1712189	33.4765537	0.045184842	49	1609.058347	0.006467546
6167674	2	27	1966	-85.5530853	32.3116131	0.063812677	57	1814.451042	0.007886587
6167677	2	29	1966	-85.0626449	32.1473077	0.051265527	50	1836.396808	0.006717023
6167678	2	35	1966	-86.8858316	30.9977072	0.048823775	47	1510.890494	0.007008085
6167680	2	37	1966	-87.8321999	31.0969767	0.068359637	48	1715.146252	0.007502631
6167682	2	41	1966	-87.5183809	30.2818577	0.112243998	48	1721.643022	0.014442426
6167684	18	3	1966	-72.5159969	41.7026037	0.046978474	55	1634.246826	0.007126535
6167686	21	4	1966	-75.4652999	39.0287137	0.045048012	59	1713.84355	0.00627535
6167688	25	10	1966	-83.8569684	30.2734632	0.094053333	56	2168.69449	0.010696006
6167720	25	12	1966	-82.7337409	30.5026237	0.052412623	45	1720.500594	0.009535978
6167724	25	19	1966	-81.9062085	30.7202649	0.049745484	48	1898.561668	0.00653655
6167728	25	37	1966	-82.1623546	30.2531989	0.044973708	22	1039.698669	0.002782577
6167736	27	9	1966	-84.9734875	31.8866376	0.058044139	57	1798.026533	0.007911564
6167744	27	12	1966	-82.3706809	32.1082297	0.05742875	50	1716.002985	0.007338677
6167748	27	19	1966	-82.4803579	33.7890197	0.053498014	55	1765.332501	0.006648498
6167756	34	18	1966	-87.964599	41.4686591	0.038308514	49	1845.122545	0.003823727
6167760	34	28	1966	-89.4243639	40.4972564	0.040604087	47	1613.886585	0.00411498
6167764	34	49	1966	-90.2587326	38.3851828	0.03758016	45	1669.429538	0.004295128
6167768	35	2	1966	-87.2001879	41.3297597	0.035585204	51	1557.591951	0.00515552
6167772	35	9	1966	-84.9394079	41.6024567	0.049369172	63	2093.941824	0.005624729
6167776	35	10	1966	-87.3633993	40.6790779	0.038722494	52	1730.240573	0.004905609
6167780	35	20	1966	-84.8534885	40.7030618	0.028228305	42	1340.916702	0.003455537
6167784	35	29	1966	-85.4421615	39.4677041	0.041989521	56	1723.618404	0.005204686
6167788	35	39	1966	-86.1463592	38.2672943	0.05590277	63	1764.730519	0.008135057
6167792	39	7	1966	-86.2041469	36.9336087	0.048699494	59	1754.611719	0.006789285
6167796	39	17	1966	-83.6101219	37.7613187	0.05706289	63	1571.406842	0.009500172
6167800	39	22	1966	-84.8112865	37.470864	0.049806534	60	1649.780922	0.007506318
6167852	25	21	1966	-81.8343049	29.8970697	0.05534171	45	1651.830419	0.006905873
6167856	25	24	1966	-81.4189503	27.3232866	0.297544226	38	1585.655277	0.069621174
6167860	25	26	1966	-81.448561	26.2943143	0.083360046	44	1974.26967	0.008590689
6167864	25	31	1966	-80.3854635	26.9657323	0.074529976	38	1769.866178	0.008894591
6167868	25	36	1966	-80.5364609	25.0015697	2.953839654	36	1587.906283	0.064243333
6167872	27	3	1966	-81.4181496	31.3641465	0.10156701	62	2382.899753	0.014771944
6167877	27	11	1966	-81.3595879	32.3437127	0.059178142	48	1597.14581	0.007889865
6167881	27	13	1966	-82.7652865	32.7366314	0.054474016	54	1744.416038	0.007322914
6167885	27	14	1966	-83.4524425	32.3986852	0.089056249	55	1995.900437	0.007790808
6167889	27	23	1966	-84.8850949	33.6355697	0.054665565	58	1807.505548	0.007656226
6167893	27	24	1966	-83.3156813	34.0324127	0.057277147	56	1795.743952	0.007599536
6167896	27	26	1966	-84.7282157	34.566415	0.051978636	60	1826.791538	0.007934223
6167900	34	2	1966	-89.3321502	42.1593177	0.038089209	52	1600.495724	0.0046308
6167903	34	7	1966	-90.0300702	41.3974197	0.039736498	49	1624.25929	0.004227723
6167906	34	10	1966	-89.7704347	41.3504896	0.042484555	56	1932.310608	0.004788024
6167911	34	27	1966	-89.3175167	40.6045464	0.032519069	45	1645.734087	0.003584852
6167919	34	51	1966	-89.5364836	38.6981367	0.024082532	31	1197.510841	0.00241462
6167923	35	3	1966	-86.2170269	41.7272707	0.036132803	49	1590.064782	0.00459089
6167930	35	16	1966	-85.5449749	40.0330447	0.042758319	58	1658.074542	0.005551731
6167938	35	31	1966	-84.9764184	39.493804	0.044073957	59	1758.512864	0.005654992
6167942	35	40	1966	-85.0940693	38.7795826	0.058495478	69	2051.451577	0.008043654
6167946	35	42	1966	-87.4410458	37.9911389	0.051512746	63	1994.40782	0.006857974
6168339	34	6	1966	-87.908702	42.0160676	0.015108417	24	876.672552	0.001614028
6168341	34	14	1966	-88.1879809	41.9335847	0.027926539	40	1270.626259	0.003261681
6168344	34	22	1966	-90.9814019	40.6514497	0.043067132	56	1740.557821	0.005196361
6168348	34	24	1966	-90.5087794	40.8602881	0.024240917	34	1265.468625	0.002591659
6168352	34	34	1966	-87.724604	40.6463646	0.030568096	41	1356.12081	0.003387648
6168356	35	15	1966	-86.0561139	40.2183267	0.031098396	45	1475.923759	0.003823699
6168358	35	22	1966	-87.1438756	39.5330205	0.050893613	64	2012.118493	0.00696535
6168362	35	33	1966	-87.1850279	38.5758877	0.058360015	66	1908.643951	0.007823602
6168366	39	8	1966	-85.7169959	36.8194377	0.040852982	50	1711.411848	0.005036671
6168370	39	18	1966	-83.7306599	37.5931367	0.05447117	63	1554.856513	0.008447518
6168373	39	19	1966	-83.9410399	37.9925897	0.049604832	54	1605.649663	0.006850048
6228018	39	6	1966	-86.6314152	36.9907469	0.039775653	50	1713.97273	0.004881948
6228022	39	36	1966	-88.3261579	37.3299427	0.048624834	55	1782.332771	0.005711332
6229214	44	12	1966	-70.5624489	44.1485557	0.025501891	42	1486.015181	0.003502031
6229217	66	74	1966	-82.9107789	39.1527143	0.041307968	56	1664.388958	0.005772587
6229222	91	49	1966	-87.6425339	44.5887327	0.040811408	47	1471.979933	0.004625712
6232185	56	14	1966	-65.22097	47.80494	0.037343294	55	1219.109184	0.00767273
6232187	56	21	1966	-66.9302	46.40997	0.032197311	53	1430.923441	0.004889657
6232190	56	33	1966	-67.42583	45.33027	0.036408604	54	1264.310975	0.006722378
6232191	56	38	1966	-66.65618	45.08596	0.054106532	70	2031.444999	0.007794999
6232194	56	42	1966	-65.04924	45.76289	0.043641406	65	1477.372041	0.008079703
6232195	58	3	1966	-72.1685998	42.8007764	0.040208903	63	1566.694789	0.007005464
6232198	58	4	1966	-70.9134599	43.2321417	0.041154322	65	1879.707475	0.006821894
6232199	58	13	1966	-72.3814817	43.0263963	0.032278906	54	1500.325633	0.005446495
6232202	58	14	1966	-72.2121162	43.0768236	0.037967098	59	1539.148366	0.005708155
6232873	56	41	1966	-65.79995	45.63438	0.054192286	76	2194.656095	0.008397199
6232876	58	1	1966	-71.8661202	42.9015085	0.033522109	51	1342.683002	0.005227896
6232880	58	6	1966	-71.2880123	43.1980043	0.033910522	53	1440.217913	0.005408136
6232883	58	7	1966	-71.6191959	43.2494327	0.036631671	57	1555.449464	0.005401485
6232890	58	11	1966	-71.8805982	43.4568165	0.028609623	52	1249.988807	0.005364056
6232894	58	15	1966	-72.1318885	43.5045711	0.028265479	46	1419.008058	0.004204821
6232898	58	16	1966	-71.35	44.1166667	0.035316186	46	1137.826218	0.006139576
6232902	58	17	1966	-71.3885019	44.3571867	0.050195917	68	1347.758737	0.008984986
6232906	58	20	1966	-71.5868762	44.6832807	0.049943541	78	2005.155482	0.008234947
6232910	58	21	1966	-71.3006396	44.8672811	0.048221787	64	1437.346767	0.008229048
6232914	58	22	1966	-71.3746691	44.9972951	0.037868295	47	1302.646976	0.005895661
6232918	59	6	1966	-74.9720939	39.7769177	0.049929827	53	1752.095293	0.006084925
6232922	59	7	1966	-74.8443379	39.6956577	0.039796532	45	1316.199085	0.005852734
6232999	82	1	1966	-89.4379279	36.4175101	0.053041641	55	1760.856383	0.006469669
6233003	82	11	1966	-88.9027887	35.9420253	0.040624569	44	1579.78134	0.005354482
6233007	82	40	1966	-83.9205469	35.9074137	0.041193938	48	1586.366534	0.00546394
6233009	82	41	1966	-82.9128272	36.0465477	0.042630825	50	1594.97688	0.005562544
6233013	82	42	1966	-82.077152	36.3180044	0.042834899	55	1388.697605	0.007453689
6233020	87	4	1966	-72.8507919	43.2885447	0.037118765	53	1420.028775	0.0051949
6233024	87	9	1966	-73.0190299	43.4057997	0.039471526	55	1752.857081	0.005576706
6233028	88	4	1966	-79.1647743	38.1909534	0.055988407	62	1996.467646	0.006553316
6233032	88	5	1966	-78.5051729	38.5758867	0.050709831	66	1853.179451	0.007185566
6233037	88	15	1966	-80.0474493	37.8008166	0.058742028	72	1841.63122	0.008883893
6233041	88	17	1966	-79.873929	37.4881381	0.042695734	48	1522.566572	0.005727264
6233141	56	34	1966	-67.34539	45.57721	0.054241119	69	1475.061972	0.008830164
6233144	56	37	1966	-66.10086	45.86385	0.045011826	60	1498.268608	0.007208449
6233149	58	8	1966	-71.1982777	43.2499219	0.046055967	65	1866.726291	0.007133921
6233151	58	9	1966	-71.6070436	43.3742607	0.032436806	51	1471.794923	0.005182116
6233153	56	17	1966	-67.18408	46.91322	0.042014945	53	1433.443042	0.005808185
6233154	56	29	1966	-64.96499	46.73222	0.047453923	60	1582.982333	0.007195565
6233155	58	18	1966	-71.7063079	44.1798777	0.059352778	81	1766.618933	0.010592004
6233157	56	30	1966	-64.95069	46.88718	0.049960789	69	1935.161585	0.008102619
6233158	59	8	1966	-74.8571779	39.9721857	0.032131905	44	1480.537012	0.003868392
6233160	58	2	1966	-71.0690899	42.9514077	0.037880451	62	1734.421114	0.00678346
6233163	58	5	1966	-71.686612	43.1841551	0.031854792	54	1231.093621	0.005797806
6233164	58	12	1966	-71.2929175	43.9913408	0.037400161	45	1188.260799	0.005797655
6233167	58	19	1966	-71.3190129	44.6075764	0.04788069	69	1591.522056	0.008371214
6233207	59	2	1966	-75.3494715	39.3852634	0.051761682	58	1828.549303	0.006328471
6233210	59	5	1966	-74.2280982	39.9994195	0.046958312	55	1637.921157	0.007316903
6233287	75	1	1966	-63.99116	47.01855	0.022020373	37	1300.501493	0.003364278
6233291	76	5	1966	-73.40518	45.72505	0.023548172	42	1328.155081	0.003209197
6233295	77	1	1966	-71.4546814	41.6039129	0.037554475	56	1520.09158	0.006715943
6233315	72	98	1966	-75.8171469	39.7862277	0.034893432	48	1634.647406	0.004350318
6233319	75	5	1966	-62.36825	46.31964	0.028239621	39	1182.994554	0.004668035
6233324	76	4	1966	-73.33089	45.08068	0.044878559	59	1780.610849	0.004949649
6233328	76	6	1966	-74.09216	45.78486	0.037020987	59	1696.579786	0.005280224
6233331	80	6	1966	-79.7849141	34.0240154	0.04769053	51	1511.315913	0.00698771
6233336	80	14	1966	-81.4124759	34.1960217	0.055456578	57	1675.368739	0.008188173
6233371	77	2	1966	-71.2448829	41.4859497	0.024700381	38	1387.078662	0.003353584
6233383	80	9	1966	-81.3572843	33.7228886	0.056638248	51	1761.89323	0.00690521
6233387	80	12	1966	-80.5795979	34.1121757	0.060958522	57	1853.080268	0.008402061
6233392	82	2	1966	-89.3646928	36.3065622	0.048586542	38	1390.051463	0.005393173
6233396	82	10	1966	-88.8148959	35.3431047	0.041820653	44	1522.734282	0.004793638
6233400	82	12	1966	-88.8621969	35.8134197	0.045595065	48	1717.703351	0.005457123
6233403	82	19	1966	-86.3315439	36.3259217	0.044685114	55	1867.765478	0.005594202
6233408	82	20	1966	-86.6658089	36.5086597	0.040658392	49	1665.798168	0.005303024
6233409	82	22	1966	-86.8259959	35.8589627	0.039803631	52	1771.089903	0.005011931
6233421	82	39	1966	-83.8099149	35.7304657	0.062828691	73	1972.458922	0.009475688
6233425	87	5	1966	-72.5853589	43.4717157	0.036468077	58	1768.605802	0.005745176
6233429	87	7	1966	-72.2608612	43.8966381	0.036340044	56	1643.12552	0.00544174
6233433	87	8	1966	-73.1953659	43.0090337	0.038660355	56	1739.139027	0.005632955
6233437	87	15	1966	-72.4028527	44.3378666	0.045069123	58	1520.498982	0.007559116
6233441	87	17	1966	-72.3791513	44.5503853	0.032999138	52	1434.53148	0.005145947
6233445	88	28	1966	-77.6223439	37.2171627	0.047862878	60	1619.929813	0.00771773
6233449	88	45	1966	-76.0845349	36.6122367	0.055640209	67	2069.277264	0.008683219
6233453	90	12	1966	-82.0947269	38.7324167	0.044251478	56	1641.556467	0.007200659
6234412	90	13	1966	-82.5986473	38.1939311	0.046690308	51	1350.541016	0.007107715
6234414	90	50	1966	-78.1156149	39.6395297	0.050990796	61	1687.445218	0.008179337
6234417	90	51	1966	-77.8551519	39.4422397	0.043568098	51	1536.258447	0.005342
6234419	80	1	1966	-80.1081539	32.7927447	0.118594721	65	2223.814609	0.016042279
6234420	90	52	1966	-80.6889494	40.0890487	0.045875299	63	1887.548061	0.006664356
6234422	91	12	1966	-92.2379749	45.5969217	0.057164087	82	2237.288732	0.008405968
6234423	80	7	1966	-80.0543589	33.6866717	0.050168767	54	1768.822837	0.006946643
6234426	82	3	1966	-89.3754293	35.0517759	0.031999478	38	1511.364331	0.003649634
6234428	91	40	1966	-89.8554319	44.4454137	0.031279197	53	1659.369053	0.004278104
6234429	82	5	1966	-89.334166	35.6893173	0.041479576	50	1694.713942	0.005593644
6234431	91	41	1966	-89.4892659	44.6134037	0.036909652	58	1480.36111	0.005440926
6234432	82	8	1966	-88.314377	36.178722	0.056280458	61	1779.051131	0.007440263
6234433	91	42	1966	-89.2453309	44.7766037	0.031944274	52	1667.732417	0.004191226
6234435	82	13	1966	-86.9969029	36.1745577	0.045076259	56	1707.892242	0.006228684
6234436	91	43	1966	-89.0520699	44.2134397	0.035729664	51	1575.972041	0.004928119
6234438	91	50	1966	-91.0057829	43.7898747	0.045329188	60	1762.229284	0.005647967
6234439	82	18	1966	-87.6791989	35.4941757	0.063583194	66	1983.255987	0.008832109
6234441	91	51	1966	-90.8675449	43.5329127	0.041659492	59	1623.245088	0.005485004
6234442	82	21	1966	-86.6657259	35.3350377	0.048761529	53	1778.976265	0.00641948
6234444	91	52	1966	-90.7422119	43.3269947	0.037161757	55	1535.808008	0.005906265
6234445	82	23	1966	-86.1676666	35.7357596	0.047639586	52	1689.520383	0.006285083
6234447	91	62	1966	-88.3351209	43.6599137	0.037153771	56	1715.64146	0.004362684
6234448	82	28	1966	-85.2816399	35.1334457	0.037330528	47	1421.783983	0.005442332
6234449	91	63	1966	-87.8785709	43.3759057	0.040595375	52	1601.77933	0.004599061
6234452	91	70	1966	-87.9862509	42.8005177	0.034226028	48	1592.899295	0.003918269
6234454	82	33	1966	-84.1514213	35.9135129	0.041795952	52	1609.760485	0.005868395
6234458	82	38	1966	-83.5013209	36.1754317	0.053257254	63	2044.045314	0.006914015
6234461	87	6	1966	-72.7210716	43.7503293	0.039561967	55	1628.250733	0.005757352
6234464	88	9	1966	-77.2851029	38.9966467	0.03812206	48	1575.9333	0.005221734
6234467	88	22	1966	-78.5422838	37.9095168	0.045670057	63	1880.810239	0.006654595
6234469	88	29	1966	-76.341428	37.6595013	0.051368573	57	1696.819695	0.00804536
6234472	88	32	1966	-75.7320849	37.5482647	0.055401982	66	2085.571489	0.008268339
6234475	88	44	1966	-77.2865338	36.5960851	0.079073483	70	1925.498648	0.010373228
6234479	90	21	1966	-81.7243649	38.2356237	0.052425573	61	1818.165957	0.007376611
6234482	90	23	1966	-80.0236509	38.6064757	0.037975413	54	1338.458953	0.006373741
6234488	90	31	1966	-79.4290148	38.5618406	0.043509161	58	1631.937832	0.006857201
6234494	90	38	1966	-80.2029429	39.4199317	0.046481757	60	1347.95368	0.00781604
6234497	90	45	1966	-79.6441639	39.4948267	0.04647607	59	1437.742662	0.0080446
6234501	90	47	1966	-79.3108149	39.2773597	0.031394245	46	1206.278996	0.005202132
6234504	91	9	1966	-92.7478269	45.0280407	0.048109465	70	2178.648672	0.006468414
6234507	91	10	1966	-92.6673889	45.3718767	0.051586174	76	2207.039067	0.007407035
6234510	91	19	1966	-90.1872869	45.6572627	0.03551371	59	1532.312601	0.005407941
6234513	91	20	1966	-90.0875099	45.3240447	0.044518264	69	1784.705195	0.00732938
6234516	91	25	1966	-88.8778549	45.8427157	0.029861593	49	1426.333292	0.00500836
6234519	91	32	1966	-91.7837359	44.1920937	0.042289936	62	1609.405862	0.006232949
6234523	91	39	1966	-90.0650949	44.6989087	0.028172324	38	1266.348487	0.002917928
6234526	91	44	1966	-88.9513789	44.4254667	0.052185034	58	1755.332562	0.005059818
6234528	91	46	1966	-88.7042539	44.0331367	0.045891482	64	1971.026306	0.005606674
6234533	91	60	1966	-88.7352209	43.4565557	0.03832478	53	1776.653429	0.003987859
6234535	91	66	1966	-89.9655699	42.6391427	0.044494785	61	1914.584933	0.004936532
6234539	91	69	1966	-88.0517639	42.6113857	0.048024093	59	1773.081844	0.005112269
6234580	90	19	1966	-81.7998809	38.5848407	0.038474358	48	1496.656824	0.005297758
6234584	91	1	1966	-92.1964109	46.3964397	0.032662814	53	1442.090466	0.005346445
6234587	91	11	1966	-92.4981849	45.9602047	0.030960997	42	1425.874672	0.003909876
6234590	91	13	1966	-91.8894659	45.5385417	0.055194901	81	2434.702425	0.008241653
6234592	91	23	1966	-89.5094999	45.7693237	0.031256011	47	1547.159275	0.004544953
6234599	91	31	1966	-92.4279399	44.6509917	0.057152804	77	2319.11159	0.006951849
6234602	91	33	1966	-91.6793739	44.4009957	0.04053336	55	1722.408173	0.004859272
6234607	91	38	1966	-90.3827969	44.1973007	0.045301504	69	1874.903433	0.007248052
6234610	91	55	1966	-89.8669289	43.4457507	0.048956322	68	1811.820466	0.007237715
6234613	91	57	1966	-89.1280059	43.9129677	0.043746098	62	1870.606599	0.005446775
6234617	91	61	1966	-88.9008629	43.4992847	0.042314873	53	1871.500064	0.003980691
6234623	91	68	1966	-88.7095809	42.9178507	0.050665169	61	1854.41877	0.005250793
6235152	80	16	1966	-82.6769029	34.7060587	0.036919714	48	1492.880527	0.005148156
6235155	82	4	1966	-89.3824309	35.5377957	0.04232912	49	1685.059669	0.005341894
6235158	82	6	1966	-89.0787139	35.3612207	0.051422861	59	2007.509104	0.006457924
6235163	82	7	1966	-88.0066271	36.3584295	0.054213578	60	1847.315505	0.007229598
6235167	82	9	1966	-88.5485594	35.4115013	0.038926184	47	1644.542224	0.00492084
6235171	82	14	1966	-87.6933829	36.5004837	0.041860479	51	1652.343309	0.005694194
6235175	82	15	1966	-87.6852374	35.1607149	0.053958001	60	1767.155862	0.007873572
6235178	82	16	1966	-87.3276749	35.8791357	0.055101251	63	1795.560625	0.008551353
6235181	82	17	1966	-87.1440788	35.3492078	0.047414553	53	1636.987927	0.006711652
6235185	82	25	1966	-85.7051469	36.0984567	0.042838202	51	1748.381858	0.005552553
6235187	82	27	1966	-85.9158515	35.3801394	0.039513974	46	1612.937018	0.005139281
6235192	82	32	1966	-84.3613059	36.2936637	0.056119581	65	1714.462672	0.009316713
6235195	82	34	1966	-84.3482669	36.0487507	0.052744821	63	1799.467267	0.007491421
6235198	82	37	1966	-83.7710499	36.1388087	0.048383103	57	1632.099391	0.006689893
6235201	87	1	1966	-72.6842749	42.8198757	0.030521047	53	1283.673034	0.005234146
6235206	87	2	1966	-73.2805777	42.8089741	0.02999838	50	1397.6323	0.004652026
6235209	87	3	1966	-72.9535464	43.0451274	0.036951534	51	1257.00417	0.006625735
6235212	87	10	1966	-73.0950522	43.6132776	0.035063828	52	1574.470284	0.004577459
6235216	87	12	1966	-71.8536769	44.6832207	0.041896207	58	1463.516619	0.006663247
6235223	87	21	1966	-73.0540719	44.3272147	0.034676452	56	1637.323086	0.005104845
6235226	88	38	1966	-80.9639369	36.8381177	0.041489274	57	1520.816651	0.00650236
6235234	90	20	1966	-81.9661949	38.2174027	0.050705231	57	1498.958255	0.007482943
6235237	90	35	1966	-81.5530999	39.0742387	0.048301985	61	1739.433842	0.006659004
6235240	90	44	1966	-79.8489868	39.5730496	0.041890564	57	1428.493023	0.007135509
6235247	91	4	1966	-91.0900569	46.3087137	0.038370296	58	1566.659077	0.006578088
6235251	91	6	1966	-90.7900389	46.1105637	0.02362231	41	1091.324231	0.00449075
6235255	91	14	1966	-91.4793629	45.3129597	0.041611125	59	1753.612337	0.005212643
6235259	91	17	1966	-90.7920749	45.1410957	0.042571499	63	1830.467646	0.006096255
6235262	91	21	1966	-89.2840419	45.2325217	0.043319653	69	1818.8531	0.007137812
6235265	91	24	1966	-89.1549899	45.9284757	0.045096744	75	1752.439422	0.008297944
6235269	91	34	1966	-91.3711239	44.0129837	0.042860505	60	1644.464653	0.005488658
6235273	91	35	1966	-91.1258789	44.9295287	0.041610674	64	1662.621343	0.006530467
6235277	91	48	1966	-87.7016689	44.0520617	0.056334879	67	2051.95064	0.006404878
6235279	91	58	1966	-89.0411229	43.4580257	0.034620941	53	1598.552069	0.004207796
6235283	91	59	1966	-88.4804309	43.6162427	0.041201219	50	1739.886923	0.003967923
6235287	91	65	1966	-90.4357819	42.5180847	0.044081951	56	1691.060697	0.004920838
6236076	61	8	1966	-73.924448	41.962831	0.041509365	58	1754.095812	0.005696906
6236080	61	19	1966	-73.676619	42.320431	0.033290826	56	1636.132961	0.004813562
6236084	61	41	1966	-76.2599639	42.5202627	0.044027771	58	1740.47442	0.005492707
6236088	61	43	1966	-76.6333469	42.5515907	0.036106309	54	1594.065329	0.005074935
6236092	61	61	1966	-79.259007	42.501632	0.045578137	58	1607.707215	0.006285864
6236096	61	70	1966	-76.0264589	43.1693497	0.048024814	64	1879.081462	0.005393551
6236100	61	93	1966	-73.7953919	43.5327757	0.032446491	55	1331.519003	0.005979883
6236107	63	9	1966	-76.9799209	35.7365247	0.035160101	41	1410.756693	0.004823677
6236111	63	18	1966	-81.3806159	35.3816897	0.042397014	55	1565.447847	0.006247246
6236115	66	41	1966	-82.9285889	40.0798127	0.042574424	47	1747.25105	0.004102724
6236120	66	56	1966	-80.7678799	40.2788528	0.029740398	45	1348.037417	0.004225331
6236124	66	57	1966	-80.9062269	40.9301837	0.027938489	45	1368.780726	0.004279643
6236128	66	60	1966	-84.6652972	39.493375	0.045269933	55	1744.379577	0.005106725
6236132	66	61	1966	-84.0114069	39.4892987	0.056853139	66	1994.450946	0.006970106
6236136	66	66	1966	-83.4663239	39.8497537	0.041990455	50	1671.391267	0.004454454
6236140	66	76	1966	-82.2853793	39.2309737	0.055183926	66	1929.826294	0.008336286
6236144	72	8	1966	-79.9481349	41.7528857	0.040542352	62	1748.558041	0.005887572
6236148	72	53	1966	-79.7089598	40.9651065	0.033990813	44	1472.112029	0.003796237
6236152	72	55	1966	-79.2174209	40.2195367	0.05412504	62	1767.370282	0.007812696
6236161	72	65	1966	-77.4006569	40.3003687	0.054317152	63	1828.892421	0.007422554
6236165	72	72	1966	-77.3969039	40.5680517	0.039044997	57	1836.817157	0.005350915
6236179	72	80	1966	-76.3050619	40.2983537	0.040039394	55	1593.917104	0.005597115
6236188	72	90	1966	-79.0688169	39.8744757	0.036204955	52	1531.790122	0.005358903
6236318	59	15	1966	-74.5975039	40.1964127	0.02673805	42	1319.514665	0.003654568
6236322	61	4	1966	-73.501859	40.624322	0.073978098	44	1581.462095	0.011728849
6236325	61	16	1966	-73.4115969	42.3497047	0.039132463	60	1881.993786	0.005346102
6236329	61	33	1966	-75.8032509	42.0123327	0.044735225	68	1753.971325	0.007105365
6236332	61	62	1966	-79.4116839	41.9986107	0.042794907	58	1617.276929	0.005591233
6236337	61	65	1966	-79.0022969	43.2572547	0.026048643	41	1381.162692	0.003121983
6236340	61	75	1966	-75.9023929	43.4558097	0.034196466	59	1549.215833	0.005543832
6236342	61	88	1966	-74.0622389	43.6884937	0.04271916	62	1554.977963	0.007672181
6236346	61	101	1966	-74.7968689	44.0889227	0.058004167	70	1816.06185	0.009156191
6236349	61	111	1966	-78.584377	42.084342	0.043258035	63	1706.452417	0.00668116
6236352	63	8	1966	-76.9029469	35.0480767	0.065056704	56	1757.737467	0.008382457
6236355	63	14	1966	-79.4688523	35.9898149	0.035604155	44	1467.502257	0.004783294
6236356	63	16	1966	-80.9241249	35.6938367	0.034518302	45	1513.629563	0.004848076
6236359	63	26	1966	-79.8547069	36.3779757	0.028080073	40	1305.020947	0.00402616
6236362	65	9	1966	-61.82158	45.38832	0.034427099	54	1185.755057	0.006738574
6236363	65	29	1966	-64.61365	44.73024	0.03558468	52	1253.204264	0.006890274
6236366	65	30	1966	-64.45683	44.72977	0.042931601	55	1653.109471	0.006281639
6236369	65	37	1966	-65.24425	43.79576	0.037752274	47	1236.607424	0.005962092
6236372	66	8	1966	-83.7075339	41.1974257	0.024656586	37	1360.076412	0.002662449
6236376	66	18	1966	-81.8352349	41.3154557	0.044925092	63	1827.170034	0.006919713
6236379	66	33	1966	-83.5725179	40.7097397	0.027548391	34	1166.740409	0.002652731
6236382	66	34	1966	-83.0386289	40.5642137	0.050891481	61	2026.287282	0.005837157
6236385	66	40	1966	-82.1083506	40.8786396	0.029456138	43	1481.627518	0.003913751
6236386	66	42	1966	-82.7639629	40.4600977	0.038961859	58	1612.400372	0.005694621
6236392	66	65	1966	-83.8167579	39.4776857	0.044535422	57	1731.541753	0.00556236
6236393	66	67	1966	-83.8036269	39.6821707	0.03736914	43	1603.44785	0.003484201
6236396	66	75	1966	-82.5305735	39.9655986	0.055675561	65	2091.025096	0.007110806
6236400	66	86	1966	-83.4163514	38.6696358	0.049686334	62	1909.376966	0.007098444
6236404	72	5	1966	-79.9582379	41.8051937	0.032222972	50	1598.903014	0.003923633
6236406	72	7	1966	-79.1302659	41.9993537	0.04099731	61	1690.276817	0.006242896
6236410	72	17	1966	-78.7387779	41.4207597	0.028522902	43	1290.115314	0.003998987
6236414	72	27	1966	-77.2437149	41.0996017	0.03736435	60	1722.458621	0.005798395
6236418	72	29	1966	-76.6638159	41.3121387	0.026230984	41	1287.88319	0.003463047
6236422	72	30	1966	-76.903319	41.8749574	0.026359631	45	1299.964894	0.003998415
6236424	72	37	1966	-75.3893569	41.1159967	0.037771804	56	1400.352389	0.006342688
6236436	72	68	1966	-77.6852029	40.3760787	0.052598198	67	1894.13953	0.007614681
6236446	72	82	1966	-75.6585399	40.2334157	0.029068191	47	1629.107662	0.003551899
6236454	72	92	1966	-78.2188889	39.8296047	0.03384456	48	1455.833178	0.004890533
6236458	72	94	1966	-77.4456949	39.9854797	0.042197936	50	1735.863352	0.004586304
6236950	59	9	1966	-74.9255249	39.4166137	0.042545435	47	1286.217931	0.006017866
6236952	59	19	1966	-74.7967659	41.1181687	0.028082518	44	1470.849407	0.004172494
6236956	61	3	1966	-73.392019	40.900112	0.031198847	44	1473.853341	0.004259915
6236960	61	13	1966	-74.5802369	41.5334407	0.035379087	54	1766.251223	0.004860324
6236964	61	21	1966	-74.1783949	42.3989107	0.037722149	55	1584.03442	0.005073533
6236968	61	26	1966	-74.1951349	42.7318997	0.04183497	60	1710.274446	0.005213024
6236970	61	30	1966	-75.9366669	42.3472227	0.040299036	60	1707.932563	0.005779864
6236974	61	85	1966	-74.3975289	43.5654587	0.043325132	55	1420.581717	0.00767538
6236978	61	94	1966	-75.4279329	44.3163047	0.026547301	48	1253.999445	0.00435594
6236982	63	1	1966	-78.3795679	33.9814607	0.044215925	45	1393.263694	0.006471212
6236986	63	3	1966	-77.8775469	34.1327657	0.082296735	58	1915.033906	0.015259842
6236988	63	4	1966	-78.0716243	34.5342189	0.078960284	64	1929.368248	0.011185244
6236992	63	11	1966	-77.7112775	35.2819414	0.049443855	51	1618.153701	0.006875542
6236996	63	12	1966	-78.3220803	35.6755372	0.042432179	49	1536.580959	0.006083342
6237000	63	25	1966	-78.4863356	36.0593305	0.040835817	46	1387.133075	0.006158772
6237003	65	5	1966	-60.73225	45.58382	0.042060387	55	1628.509539	0.010291588
6237007	65	17	1966	-63.44884	45.29564	0.038511789	55	1412.771996	0.006671799
6237011	65	22	1966	-64.04303	45.98404	0.038552069	51	1039.174039	0.006311738
6237014	65	25	1966	-63.73526	44.50176	0.042273619	52	1602.189976	0.006693803
6237018	66	1	1966	-84.3898389	41.5501237	0.023232009	34	1271.799625	0.002537331
6237022	66	6	1966	-83.087075	41.4427171	0.045348023	55	2126.63061	0.004297108
6237026	66	7	1966	-83.2608719	41.5380767	0.031558112	50	1667.743002	0.003677317
6237030	66	16	1966	-81.1002789	41.2820227	0.025790921	38	1322.296527	0.003197801
6237036	66	21	1966	-80.7420743	41.6803821	0.046025543	65	1974.046997	0.006341899
6237040	66	26	1966	-84.1745919	40.0762987	0.028976016	46	1539.598648	0.003462809
6237044	66	49	1966	-81.8999167	40.1062833	0.044936394	61	1847.298914	0.006666506
6237048	66	59	1966	-84.6179359	39.2921467	0.046165994	61	1875.470789	0.006520721
6237052	66	68	1966	-83.9067219	39.8925897	0.03670013	51	1822.064222	0.004004254
6237057	66	82	1966	-81.8827139	39.2701767	0.053355762	67	1733.987098	0.008485884
6237061	66	83	1966	-81.6718899	39.8938347	0.057467777	64	1951.405109	0.006939161
6237069	72	32	1966	-76.9536889	41.5080627	0.036931475	56	1367.075279	0.005938563
6237077	72	48	1966	-80.3260179	40.0771657	0.027784694	41	1442.714005	0.003341261
6237081	72	87	1966	-75.9947369	40.6352357	0.034640585	50	1579.177979	0.004377253
6237085	72	88	1966	-80.0595075	39.9302972	0.058064858	70	2005.298265	0.00835328
6237089	72	89	1966	-79.4499739	39.9992837	0.042798535	57	1686.921845	0.00635931
6237093	72	96	1966	-76.8886949	39.9221277	0.038109864	44	1363.629901	0.004398631
6237433	61	2	1966	-72.7986209	40.8644157	0.037820828	48	1551.617643	0.00468163
6237436	61	5	1966	-73.2277839	40.7992357	0.03188597	41	1313.434064	0.004277542
6237439	61	17	1966	-73.3039629	42.7275747	0.039976912	67	1447.20692	0.007427219
6237442	61	25	1966	-74.4021599	42.6548767	0.03094908	50	1441.235424	0.004272249
6237446	61	44	1966	-76.036148	42.036872	0.03310292	51	1586.053704	0.004853631
6237449	61	54	1966	-78.6967019	42.9562967	0.033530566	51	1444.025944	0.00483154
6237452	61	110	1966	-77.4085679	42.6074657	0.037851926	57	1544.839033	0.00555367
6237459	63	10	1966	-77.4434709	35.9691437	0.039308073	45	1587.005268	0.004713509
6237462	63	15	1966	-79.7044966	35.917637	0.043065062	54	1565.471901	0.006401001
6237465	65	1	1966	-61.33859	46.12688	0.032717466	49	1034.383112	0.006025446
6237468	65	6	1966	-60.63001	45.79803	0.034382886	43	1222.57378	0.005623488
6237472	65	13	1966	-62.21257	45.2679	0.042091932	59	1359.419748	0.007348737
6237474	65	18	1966	-63.55918	45.71858	0.039319244	54	1292.245167	0.006033447
6237478	65	33	1966	-65.46909	44.75239	0.027971434	50	1428.713745	0.004827983
6237480	65	38	1966	-65.62198	43.41355	0.032226326	36	1257.645286	0.004790717
6237482	66	2	1966	-84.1216579	41.3867557	0.027524421	39	1492.667524	0.003053144
6237484	66	12	1966	-82.6455149	41.1694157	0.029343501	42	1575.768614	0.002963427
6237486	66	22	1966	-80.9900079	41.3710349	0.031098838	40	1425.780945	0.003801879
6237488	66	25	1966	-84.1972889	40.9809757	0.027845862	39	1450.538151	0.003133291
6237490	66	27	1966	-84.7793129	40.2671711	0.033266881	47	1566.12011	0.004274862
6237492	66	32	1966	-83.6735259	40.6744266	0.028178563	45	1420.440677	0.003872554
6237494	66	35	1966	-83.2978987	40.246894	0.035335343	42	1626.660975	0.003639667
6237496	66	43	1966	-82.0294509	39.9930387	0.045392858	60	1779.175265	0.006103429
6237498	66	48	1966	-81.5000079	40.2459467	0.041187332	59	1837.768392	0.00586401
6237500	66	73	1966	-82.1680389	39.3166637	0.050782091	63	1796.264735	0.007776453
6237502	66	81	1966	-81.5807429	39.5671857	0.056347416	66	1992.176064	0.007836169
6237504	66	88	1966	-82.4223789	38.6500007	0.047239497	59	1728.93639	0.007049731
6237506	72	4	1966	-80.3204561	41.7146604	0.041184291	59	1913.905899	0.004895424
6237508	72	6	1966	-79.3470999	41.5335247	0.050638343	63	1601.222234	0.009157715
6237512	72	26	1966	-77.2776099	41.4526027	0.030033463	40	1370.330486	0.003538308
6237514	72	70	1966	-77.0638289	40.0572077	0.032578738	51	1599.557044	0.004420116
6237516	72	77	1966	-76.4352239	40.2784227	0.044478708	45	1764.036691	0.00417882
6237518	72	79	1966	-76.7674909	40.4840637	0.03738617	51	1789.77213	0.004115877
6237520	72	83	1966	-75.9610008	40.7874732	0.03530591	54	1379.957652	0.005160593
6237522	72	85	1966	-75.9991309	40.6899507	0.039605044	56	1516.382826	0.005584599
6238427	39	28	1966	-86.1387677	37.2573275	0.060586697	69	1983.041348	0.009134227
6238431	39	29	1966	-86.8961593	37.8199855	0.047515447	57	1822.221192	0.006575757
6238436	39	39	1966	-84.8237459	38.7213307	0.049780852	60	1828.289937	0.006604463
6238441	39	40	1966	-84.1633637	38.4344957	0.05052424	63	1857.619189	0.007241308
6238445	39	41	1966	-84.5727271	38.3791569	0.050460096	63	1849.013317	0.007405472
6238449	39	42	1966	-84.027055	38.0304392	0.037956671	49	1733.800648	0.004702866
6238453	39	43	1966	-84.0681929	38.1661827	0.040234698	53	1925.365276	0.004819944
6238458	44	9	1966	-70.6509909	44.3180457	0.028540071	46	1384.237017	0.004290104
6238464	44	43	1966	-67.6794181	45.2262561	0.046621503	59	1582.216745	0.008034182
6238468	46	8	1966	-77.5489971	39.5780009	0.052170917	58	1563.761382	0.007125278
6238471	46	9	1966	-77.3304347	39.7148359	0.037563136	47	1515.86309	0.004658445
6238476	46	18	1966	-76.8160804	39.3456735	0.03566666	53	1540.627212	0.0053495
6238481	46	19	1966	-76.4856444	39.5386386	0.039877308	56	1551.001943	0.005602804
6238485	46	29	1966	-76.8406989	38.5217447	0.043610762	53	1556.448388	0.006353935
6238489	46	40	1966	-76.075195	38.7863193	0.05129936	54	1664.643546	0.006252774
6238493	46	41	1966	-76.1997997	38.4607494	0.050117257	58	1844.622761	0.006589507
6238498	46	46	1966	-75.7898657	38.4485307	0.049359384	51	1670.636048	0.006133007
6238502	46	50	1966	-75.3924539	38.2159987	0.064179867	68	2060.040372	0.009173372
6238510	49	16	1966	-86.7090609	45.9415397	0.035066556	53	1440.009678	0.005578877
6238514	49	23	1966	-85.7410523	46.6724597	0.042038671	51	1449.500646	0.005648883
6238517	51	8	1966	-90.5715029	32.1085617	0.065012782	57	1789.555975	0.008585758
6238529	51	28	1966	-88.5298989	31.6890917	0.019062501	22	1025.744109	0.002097921
6238533	51	29	1966	-88.6519849	30.3885217	0.036987851	25	1055.169501	0.00415365
6238537	56	9	1966	-66.51451	47.40475	0.041592203	54	1087.451796	0.006683681
6238568	39	23	1966	-84.8137054	37.9849668	0.046679324	56	1832.511201	0.005576181
6238578	39	33	1966	-87.6776119	37.5933277	0.046568798	56	1798.814607	0.005594824
6238580	39	38	1966	-85.5587469	38.4108577	0.053398341	66	1912.222353	0.007230344
6238587	44	28	1966	-67.948462	44.7196649	0.036486543	46	1412.215529	0.005641532
6238590	44	45	1966	-67.7273933	45.5726168	0.07292487	70	1787.699341	0.022571952
6238593	46	3	1966	-79.1698659	39.4387843	0.037473748	56	1447.571139	0.00599862
6238599	46	13	1966	-77.0384304	39.516536	0.053512401	58	1707.040629	0.006624419
6238602	46	14	1966	-77.0236228	39.6423121	0.034843797	52	1721.607911	0.004756675
6238604	39	26	1966	-85.0956126	37.9353872	0.042310969	51	1771.757078	0.005186082
6238605	46	23	1966	-76.8054449	38.9314667	0.038010086	49	1325.875523	0.005617171
6238608	46	28	1966	-76.972877	38.5584741	0.055514487	64	1821.948678	0.007986677
6238612	46	31	1966	-77.0558732	38.5960742	0.054542521	63	1878.807565	0.007974555
6238614	39	34	1966	-87.5068449	37.1865197	0.052673671	58	1680.064326	0.007972293
6238615	46	33	1966	-75.94228	39.52083	0.047374188	55	1613.703617	0.006082089
6238617	46	38	1966	-75.8845056	38.783977	0.057556264	60	1706.657893	0.007430542
6238618	39	37	1966	-85.2054969	38.2768507	0.042928061	53	1772.936215	0.005266395
6238620	44	4	1966	-70.7139509	43.0811777	0.030723355	53	1494.023078	0.005447693
6238621	46	42	1966	-76.2432656	38.3676908	0.099485293	73	2343.612362	0.022464096
6238624	46	45	1966	-75.5667709	38.3007427	0.051882331	60	1921.506051	0.007861002
6238625	46	1	1966	-79.1557785	39.5041468	0.0405038	57	1499.492916	0.006931918
6238627	46	47	1966	-75.5797027	38.1651924	0.062020394	64	1942.573186	0.008425885
6238628	46	6	1966	-77.8655019	39.6129717	0.043901031	49	1592.501001	0.004715126
6238630	47	5	1966	-71.0799209	41.9386087	0.031367978	48	1563.335482	0.005106913
6238631	46	11	1966	-77.0930269	39.1514457	0.051628244	58	1640.175948	0.007071419
6238634	46	16	1966	-76.8137896	39.5515705	0.034749518	49	1683.346042	0.004557014
6238636	46	17	1966	-76.7644397	39.7002158	0.032742267	47	1600.057642	0.004186815
6238637	49	12	1966	-87.4492339	45.6475737	0.034769488	52	1360.483376	0.005089947
6238639	46	21	1966	-76.5302869	39.0573627	0.048640106	53	1712.052988	0.00610416
6238640	49	35	1966	-85.4136135	42.2526585	0.045887686	62	1906.642224	0.005799762
6238642	46	24	1966	-76.8203729	38.7216347	0.049872957	56	1630.264276	0.006908759
6238643	49	53	1966	-84.1820229	42.7647917	0.029942419	47	1586.643844	0.003741688
6238645	46	26	1966	-76.5747889	38.5016307	0.04471117	54	1610.411432	0.006633149
6238647	51	4	1966	-90.4443729	34.8108067	0.043631781	53	1586.574273	0.006227474
6238649	46	27	1966	-76.5442846	38.168955	0.063357241	61	1639.644729	0.008752144
6238652	46	34	1966	-75.9042529	39.5231571	0.045972064	60	1923.035696	0.006305796
6238653	56	13	1966	-64.83911	46.99828	0.045065266	63	1621.573384	0.007825596
6238656	46	36	1966	-76.1481269	39.2640947	0.054091771	62	2086.388239	0.006707856
6238659	46	37	1966	-76.192383	39.10312	0.057578267	63	2224.041728	0.007101209
6238662	46	48	1966	-75.2663372	38.2256736	0.067171567	64	1960.095461	0.009454096
6238665	46	49	1966	-75.1522729	38.2475487	0.07283584	68	2230.469076	0.009333091
6239139	39	30	1966	-86.2962376	37.5961302	0.054283419	62	1976.402725	0.00745398
6239144	39	32	1966	-87.0823369	37.2448427	0.041231757	51	1479.658796	0.005806276
6239148	39	44	1966	-83.9295763	38.2051493	0.050704264	57	1774.532896	0.006540124
6239151	39	46	1966	-83.0511849	38.4666117	0.034392389	43	1289.59728	0.004454916
6239156	44	22	1966	-68.9653549	44.8325017	0.031463677	56	1513.973329	0.005247081
6239169	46	7	1966	-77.5681548	39.6486494	0.031095474	43	1704.988697	0.003562187
6239176	46	10	1966	-77.0157189	39.0309157	0.039696705	53	1666.175768	0.00517827
6239178	46	12	1966	-77.0002244	39.1152852	0.032862786	46	1493.525765	0.004748925
6239183	46	15	1966	-76.9692792	39.6359624	0.052464439	55	1792.294701	0.00599087
6239187	46	20	1966	-76.3159492	39.4890766	0.056645591	61	1625.690418	0.007604505
6239191	46	22	1966	-76.8497577	39.0164522	0.05757404	65	1769.227621	0.007813465
6239195	46	25	1966	-76.5513069	38.4066787	0.064437414	64	1721.890525	0.008742952
6239199	46	30	1966	-77.0780349	38.6021387	0.06841884	63	2017.449738	0.008428214
6239207	46	35	1966	-75.7640082	39.276509	0.050009071	59	1908.654539	0.00682524
6239211	46	39	1966	-75.9331139	38.8211117	0.048044211	57	1762.980684	0.006391889
6239215	46	43	1966	-76.2101023	38.5258637	0.066085673	61	2140.845298	0.010805006
6239220	46	44	1966	-75.7964256	38.5203297	0.052977295	62	1895.71494	0.007271825
6239225	47	3	1966	-70.7712211	41.7147936	0.029169329	41	1497.477097	0.004139305
6239229	47	4	1966	-70.0406049	41.9783157	0.046783894	51	1601.73511	0.006305881
6239233	47	13	1966	-71.6344439	42.6459177	0.038015145	56	1526.234528	0.00563414
6239237	49	45	1966	-84.5561649	44.0897553	0.040417244	53	1546.054017	0.004567137
6239240	49	57	1966	-83.9934149	41.9189847	0.036666483	55	1802.224747	0.004534822
6239242	51	2	1966	-91.3943546	31.3905325	0.061566333	56	1812.973842	0.007954741
6239243	49	63	1966	-83.4224989	43.3504847	0.032111665	47	1625.789682	0.0033435
6239244	49	66	1966	-83.6658459	42.4612927	0.031349644	47	1804.776633	0.003355942
6239245	51	11	1966	-89.8251049	34.9619827	0.027757589	35	1196.659348	0.003490915
6239247	51	10	1966	-91.0571174	31.7099007	0.039733635	42	1690.306915	0.004402182
6239248	51	16	1966	-89.1019294	32.5602847	0.043739132	52	1628.423692	0.005967443
6239249	51	20	1966	-89.7137542	30.7939126	0.035445954	41	1648.80829	0.004506262
6239250	51	12	1966	-89.8113619	34.8019937	0.04160139	46	1567.988915	0.004921054
6239252	51	23	1966	-88.6241136	33.1507326	0.024951103	32	1495.350293	0.002770243
6239253	56	1	1966	-68.26669	47.57378	0.035701537	41	1056.838882	0.006195778
6239254	51	22	1966	-88.5977339	34.2998857	0.040239051	45	1533.775889	0.004992321
6240323	56	5	1966	-67.53488	47.07088	0.031071408	40	975.1741013	0.004961946
6166372	90	50	1967	-78.1156149	39.6395297	0.054515706	65	1631.55645	0.008133975
6166377	90	51	1967	-77.8551519	39.4422397	0.061452866	68	2108.169697	0.007690687
6166381	90	52	1967	-80.6889494	40.0890487	0.052789948	68	1927.370902	0.007375075
6166383	91	2	1967	-91.4282439	46.5232187	0.035293053	61	1567.968731	0.006559134
6166386	91	12	1967	-92.2379749	45.5969217	0.064595195	84	2336.739649	0.008628157
6166392	91	40	1967	-89.8554319	44.4454137	0.039721769	61	1822.607343	0.005826249
6166393	91	41	1967	-89.4892659	44.6134037	0.034853818	51	1424.18945	0.004559966
6166396	91	42	1967	-89.2453309	44.7766037	0.034016311	54	1721.29767	0.004230761
6166399	91	50	1967	-91.0057829	43.7898747	0.050373175	64	1807.19357	0.0060208
6166400	91	51	1967	-90.8675449	43.5329127	0.036968235	54	1379.776958	0.005105899
6166403	91	52	1967	-90.7422119	43.3269947	0.037777807	53	1531.34332	0.005865256
6166742	90	19	1967	-81.7998809	38.5848407	0.043438139	54	1783.42333	0.005759813
6166744	91	1	1967	-92.1964109	46.3964397	0.043116663	65	1787.805157	0.006976609
6166746	91	3	1967	-91.8218079	46.0670957	0.048095744	68	1665.048132	0.008284824
6166749	91	8	1967	-89.6003879	46.1709797	0.037047258	61	1759.444428	0.006244352
6166752	91	11	1967	-92.4981849	45.9602047	0.031525417	43	1421.156	0.004190564
6166755	91	13	1967	-91.8894659	45.5385417	0.056782834	72	1964.287126	0.007668062
6166757	91	18	1967	-90.5360189	45.0888697	0.048066431	69	1730.156282	0.007260279
6166759	91	23	1967	-89.5094999	45.7693237	0.036409919	52	1533.992046	0.005166705
6166765	91	31	1967	-92.4279399	44.6509917	0.031609721	53	1626.427334	0.004228841
6166766	91	33	1967	-91.6793739	44.4009957	0.037803281	56	1672.974105	0.005194208
6166772	91	47	1967	-88.7788779	44.6191537	0.031029097	50	1572.732853	0.003853883
6166773	91	55	1967	-89.8669289	43.4457507	0.04940628	69	1999.286437	0.006605407
6166775	91	57	1967	-89.1280059	43.9129677	0.048793115	68	2105.141475	0.006258291
6166778	91	61	1967	-88.9008629	43.4992847	0.040966004	58	1861.02094	0.004805204
6166781	91	67	1967	-89.6713569	43.0000307	0.033685704	46	1406.147121	0.004110069
6166784	91	68	1967	-88.7095809	42.9178507	0.035159988	50	1582.741268	0.004227966
6167075	91	53	1967	-90.2094039	43.8227657	0.043415473	63	1724.605824	0.006067659
6167079	91	62	1967	-88.3351209	43.6599137	0.027855828	45	1546.152067	0.003240567
6167083	91	63	1967	-87.8785709	43.3759057	0.045365948	55	1756.786279	0.004599004
6167087	91	70	1967	-87.9862509	42.8005177	0.029046735	46	1509.273046	0.003370228
6167391	90	20	1967	-81.9661949	38.2174027	0.055992305	62	1622.269731	0.009046954
6167396	90	35	1967	-81.5530999	39.0742387	0.061483948	74	2010.922265	0.008866944
6167400	90	44	1967	-79.8489868	39.5730496	0.04883709	60	1523.114298	0.007601444
6167404	91	4	1967	-91.0900569	46.3087137	0.034692564	56	1412.271514	0.006311198
6167407	91	5	1967	-90.9468609	46.7999037	0.048465834	70	1939.501619	0.007233177
6167410	91	17	1967	-90.7920749	45.1410957	0.041386976	58	1641.827832	0.005426944
6167413	91	21	1967	-89.2840419	45.2325217	0.035284383	60	1519.177038	0.006532499
6167416	91	24	1967	-89.1549899	45.9284757	0.034807192	52	1247.085489	0.006341927
6167420	91	26	1967	-88.7750249	45.4638297	0.054883334	82	2205.893839	0.008905212
6167424	91	27	1967	-88.6286329	45.3745537	0.040451196	61	1542.717444	0.006775748
6167428	91	34	1967	-91.3711239	44.0129837	0.046514078	58	1909.742148	0.005249101
6167432	91	36	1967	-90.3574219	44.8143967	0.046792303	65	1791.488979	0.007014462
6167438	91	48	1967	-87.7016689	44.0520617	0.045713813	62	2032.905219	0.005098758
6167442	91	58	1967	-89.0411229	43.4580257	0.042884699	58	1712.511578	0.00542502
6167446	91	64	1967	-90.9601049	42.8165957	0.042528212	61	1864.689957	0.005144176
6167449	91	65	1967	-90.4357819	42.5180847	0.043317209	58	1862.708565	0.004967099
6167570	90	21	1967	-81.7243649	38.2356237	0.057230899	65	1821.650819	0.008168066
6167571	90	38	1967	-80.2029429	39.4199317	0.046819547	62	1524.6741	0.0081625
6167574	90	45	1967	-79.6441639	39.4948267	0.049138209	62	1548.353746	0.008443125
6167577	91	9	1967	-92.7478269	45.0280407	0.049067757	63	2116.824319	0.004988516
6167578	91	10	1967	-92.6673889	45.3718767	0.060442378	79	2359.134131	0.007948829
6167581	91	19	1967	-90.1872869	45.6572627	0.038890955	58	1600.035595	0.005302608
6167584	91	20	1967	-90.0875099	45.3240447	0.041497899	64	1626.573345	0.006796062
6167587	91	22	1967	-89.6369409	45.3150927	0.040820535	68	1618.096322	0.007442826
6167588	91	25	1967	-88.8778549	45.8427157	0.037749362	56	1486.794135	0.006712018
6167591	91	30	1967	-86.9307629	45.3659387	0.04894084	80	2008.215019	0.008305835
6167594	91	32	1967	-91.7837359	44.1920937	0.04967102	65	1796.908414	0.006637028
6167597	91	39	1967	-90.0650949	44.6989087	0.0216118	37	1253.718349	0.00267928
6167598	91	44	1967	-88.9513789	44.4254667	0.032221974	48	1626.82517	0.003551358
6167601	91	46	1967	-88.7042539	44.0331367	0.048150397	70	2242.547728	0.00583935
6167604	91	49	1967	-87.6425339	44.5887327	0.036237488	44	1510.834071	0.00401881
6167607	91	54	1967	-90.3552409	43.7857987	0.044246579	62	1900.924717	0.005390218
6167610	91	56	1967	-89.2274789	43.5381577	0.038539041	49	1548.201957	0.004229291
6167613	91	60	1967	-88.7352209	43.4565557	0.043289347	50	1743.780933	0.004238394
6167614	91	66	1967	-89.9655699	42.6391427	0.037969732	50	1525.181434	0.004376263
6167617	91	69	1967	-88.0517639	42.6113857	0.047830578	60	1878.437957	0.005110321
6227536	2	28	1967	-85.2044589	32.8854647	0.053067727	53	1542.012842	0.00799117
6228015	67	15	1967	-96.1218109	35.7262277	0.056215633	54	1866.685963	0.006116182
6228025	7	8	1967	-90.5065699	34.9269397	0.048355596	49	1558.069161	0.005756048
6228027	39	36	1967	-88.3261579	37.3299427	0.04930663	54	1979.883271	0.005469389
6228030	50	20	1967	-95.432057	45.0215533	0.022451458	34	1314.354624	0.002227597
6228032	91	14	1967	-91.4793629	45.3129597	0.040886272	56	1939.185153	0.005175934
6229383	42	8	1967	-89.8977049	30.2797337	0.089703401	46	1448.921792	0.009603349
6229387	50	13	1967	-95.4525129	44.9630107	0.019932988	30	1238.48784	0.001803154
6232926	66	41	1967	-82.9285889	40.0798127	0.026326594	38	1357.961502	0.003237351
6232930	66	56	1967	-80.7678799	40.2788528	0.031467398	44	1499.368242	0.00409278
6232934	66	57	1967	-80.9062269	40.9301837	0.030394436	41	1313.869468	0.003952229
6232937	66	60	1967	-84.6652972	39.493375	0.042424019	52	1614.063841	0.005145581
6232941	66	61	1967	-84.0114069	39.4892987	0.058611395	67	2079.112666	0.006962372
6232945	66	66	1967	-83.4663239	39.8497537	0.041222645	53	1817.661931	0.004409703
6232949	66	76	1967	-82.2853793	39.2309737	0.055401745	66	1776.450988	0.008261856
6232953	67	8	1967	-98.5401769	34.1880867	0.025334098	31	1339.272644	0.003104167
6232955	67	28	1967	-97.8572699	36.8835027	0.023010069	33	1346.325686	0.002957039
6232959	67	29	1967	-98.9120329	36.1876257	0.040103935	41	1387.921956	0.005293174
6232963	68	12	1967	-76.7748	44.26177	0.03846805	49	1761.319392	0.003532764
6232967	68	13	1967	-76.27372	44.79355	0.032594837	55	1890.85774	0.004370423
6232971	72	8	1967	-79.9481349	41.7528857	0.051946569	69	2161.627476	0.006752507
6232973	72	53	1967	-79.7089598	40.9651065	0.031038488	43	1486.175603	0.003624262
6232977	72	55	1967	-79.2174209	40.2195367	0.05423457	65	1888.691045	0.007736469
6232981	72	65	1967	-77.4006569	40.3003687	0.035896401	53	1519.755223	0.005738541
6232985	72	72	1967	-77.3969039	40.5680517	0.052900616	57	1729.184131	0.006620325
6232991	72	80	1967	-76.3050619	40.2983537	0.032942941	49	1491.385303	0.004389221
6232995	80	3	1967	-81.0334581	32.2511024	0.080490286	55	1869.008897	0.007989886
6233161	65	14	1967	-62.11729	45.68557	0.052979737	65	1654.594066	0.007926691
6233166	65	17	1967	-63.44884	45.29564	0.040420969	56	1520.432885	0.006976381
6233169	65	22	1967	-64.04303	45.98404	0.047057774	58	1418.714234	0.006705936
6233171	65	6	1967	-60.63001	45.79803	0.033964043	48	1196.500685	0.005553988
6233172	65	25	1967	-63.73526	44.50176	0.039631722	52	1548.267077	0.006484718
6233174	65	13	1967	-62.21257	45.2679	0.044400571	62	1461.45603	0.007687583
6233176	65	34	1967	-66.07463	44.49854	0.034579115	43	1258.289885	0.004527221
6233177	65	18	1967	-63.55918	45.71858	0.050619845	60	1648.550785	0.006653981
6233178	66	1	1967	-84.3898389	41.5501237	0.023699919	39	1474.912998	0.002873933
6233180	65	21	1967	-64.68647	45.10326	0.025679542	46	1409.049172	0.008011315
6233181	65	26	1967	-63.69892	44.69807	0.046239994	58	1537.705557	0.007453539
6233182	66	6	1967	-83.087075	41.4427171	0.025312035	37	1382.316926	0.002843615
6233184	65	33	1967	-65.46909	44.75239	0.033850629	42	1276.323735	0.005176725
6233186	66	7	1967	-83.2608719	41.5380767	0.029568215	44	1770.762632	0.003399575
6233187	65	38	1967	-65.62198	43.41355	0.045191826	61	1696.06133	0.00760107
6233188	66	2	1967	-84.1216579	41.3867557	0.023562964	36	1398.716002	0.002328472
6233189	66	16	1967	-81.1002789	41.2820227	0.028328827	42	1373.859784	0.003531879
6233191	66	12	1967	-82.6455149	41.1694157	0.031623924	46	1874.356164	0.003733984
6233192	66	17	1967	-81.0750897	41.4687714	0.04562555	67	2019.63041	0.006194002
6233194	66	22	1967	-80.9900079	41.3710349	0.036914535	52	1709.822432	0.004962355
6233195	66	21	1967	-80.7420743	41.6803821	0.055978536	71	2115.689573	0.007055939
6233196	66	25	1967	-84.1972889	40.9809757	0.023502467	34	1167.063295	0.002738322
6233198	66	32	1967	-83.6735259	40.6744266	0.02917627	48	1500.882783	0.003855393
6233199	66	26	1967	-84.1745919	40.0762987	0.036738017	53	1805.390025	0.004394978
6233201	66	43	1967	-82.0294509	39.9930387	0.041005231	57	1684.352947	0.005613712
6233202	66	49	1967	-81.8999167	40.1062833	0.049694952	65	1910.344502	0.007545697
6233204	66	48	1967	-81.5000079	40.2459467	0.036043234	44	1459.992393	0.004224539
6233205	66	73	1967	-82.1680389	39.3166637	0.046525412	60	1683.255104	0.00719491
6233206	66	59	1967	-84.6179359	39.2921467	0.041158395	57	1743.184671	0.005530679
6233208	66	74	1967	-82.9107789	39.1527143	0.044882803	57	1642.128856	0.006421866
6233209	66	68	1967	-83.9067219	39.8925897	0.036558997	51	1695.066088	0.004349576
6233211	66	81	1967	-81.5807429	39.5671857	0.055033194	68	1879.539263	0.008064852
6233212	66	82	1967	-81.8827139	39.2701767	0.056413456	64	1911.374436	0.008037351
6233213	65	9	1967	-61.82158	45.38832	0.042550151	56	1250.638299	0.007615432
6233214	66	88	1967	-82.4223789	38.6500007	0.046245009	59	1724.154609	0.007065061
6233215	67	1	1967	-94.7071599	34.5662622	0.06381627	64	1905.146322	0.009281977
6233216	66	83	1967	-81.6718899	39.8938347	0.053874543	63	1856.836889	0.007139841
6233217	65	29	1967	-64.61365	44.73024	0.033682647	49	1139.741455	0.005831395
6233218	67	3	1967	-95.8166667	34.95	0.048153668	57	1830.368228	0.006371574
6233219	65	30	1967	-64.45683	44.72977	0.037515297	52	1293.493269	0.006581304
6233220	67	5	1967	-96.828193	34.448321	0.029090787	39	1609.515152	0.004121811
6233221	67	11	1967	-94.8876259	35.8426817	0.049306224	58	1887.213614	0.007218252
6233222	67	13	1967	-95.7806629	35.1738817	0.040988302	46	1663.501825	0.005525208
6233223	67	6	1967	-97.8587639	34.3763427	0.035454242	43	1543.089736	0.005160886
6233224	65	37	1967	-65.24425	43.79576	0.04358895	50	1506.81925	0.006616805
6233225	67	14	1967	-96.434896	35.1013362	0.043624831	53	1869.393233	0.006036144
6233226	67	7	1967	-97.2128782	34.1364298	0.071738638	51	1920.681023	0.006766681
6233227	66	8	1967	-83.7075339	41.1974257	0.024928331	36	1294.780621	0.002786182
6233228	67	18	1967	-98.1282339	35.0432357	0.074197387	63	2101.493813	0.009118364
6233229	67	23	1967	-95.1256319	36.9173437	0.031501678	40	1465.210143	0.003934888
6233230	66	13	1967	-82.7867429	41.1648877	0.029208305	45	1643.049018	0.003223759
6233231	67	16	1967	-97.478191	35.551189	0.031595237	42	1406.790169	0.004982693
6233232	67	24	1967	-95.8134099	36.4091897	0.047114839	58	1920.356512	0.006456528
6233233	66	18	1967	-81.8352349	41.3154557	0.049119779	64	1931.377651	0.006100739
6233234	67	17	1967	-97.4236139	35.1750957	0.042508755	52	1651.816674	0.006303169
6233235	67	26	1967	-96.0624096	36.7671854	0.046511777	55	1942.368888	0.006284397
6233236	67	31	1967	-99.3626644	36.9436159	0.037432413	35	1267.513265	0.004502071
6233237	66	33	1967	-83.5725179	40.7097397	0.028266479	43	1555.725855	0.003314254
6233238	67	20	1967	-99.7351069	35.4656557	0.060302886	44	1714.261861	0.006259483
6233239	68	15	1967	-77.00984	44.35414	0.039850021	56	1794.165788	0.004530708
6233240	67	27	1967	-97.6037139	36.2318987	0.033802407	44	1671.797786	0.004740913
6233241	66	34	1967	-83.0386289	40.5642137	0.034945158	49	1747.899486	0.003931979
6233242	72	4	1967	-80.3204561	41.7146604	0.049005748	60	1881.693252	0.005758899
6233243	67	30	1967	-98.9715489	36.6600227	0.042094623	36	1503.437551	0.00458214
6233244	66	40	1967	-82.1083506	40.8786396	0.038971593	49	1783.759169	0.004329465
6233245	72	6	1967	-79.3470999	41.5335247	0.041726303	57	1595.232412	0.007171085
6233246	72	11	1967	-79.8330619	41.0473847	0.035922431	57	1711.764179	0.005461324
6233247	66	42	1967	-82.7639629	40.4600977	0.040922002	60	1909.352583	0.005441602
6233248	72	2	1967	-80.4945401	41.6375228	0.043200223	60	1787.318955	0.006457268
6233249	72	24	1967	-77.4017208	41.8772966	0.020511429	36	1221.092231	0.002730653
6233250	66	50	1967	-81.4172439	40.1033447	0.043631334	55	1815.583852	0.005510904
6233252	72	26	1967	-77.2776099	41.4526027	0.028048824	37	1276.333588	0.003400551
6233254	66	65	1967	-83.8167579	39.4776857	0.041447699	56	1849.135031	0.005264566
6233256	72	38	1967	-75.7927799	41.7057127	0.047449146	67	1839.924815	0.006946972
6233257	66	67	1967	-83.8036269	39.6821707	0.028810332	39	1436.012146	0.003289898
6233258	72	70	1967	-77.0638289	40.0572077	0.039063706	52	1592.294998	0.004850993
6233259	72	48	1967	-80.3260179	40.0771657	0.031551521	43	1552.533829	0.003902916
6233260	66	75	1967	-82.5305735	39.9655986	0.050455773	62	1944.470747	0.006257896
6233261	72	77	1967	-76.4352239	40.2784227	0.038867621	45	1585.494531	0.004109669
6233262	72	49	1967	-79.2376019	40.6243617	0.034820775	52	1482.667558	0.005655198
6233263	72	83	1967	-75.9610008	40.7874732	0.026919609	44	1223.43977	0.003836197
6233264	66	86	1967	-83.4163514	38.6696358	0.046285495	58	1762.116188	0.006670051
6233265	72	86	1967	-75.3435909	40.8040057	0.037160355	57	1747.534916	0.005109418
6233266	72	85	1967	-75.9991309	40.6899507	0.037420479	55	1614.016899	0.005666198
6233267	67	2	1967	-95.7740762	34.7512366	0.052165749	61	1908.347328	0.007793474
6233268	72	87	1967	-75.9947369	40.6352357	0.046516242	62	1944.375986	0.005789264
6233269	75	1	1967	-63.99116	47.01855	0.024926655	46	1518.660723	0.004243351
6233270	67	12	1967	-95.6484468	35.1693515	0.056781175	53	1792.426214	0.007197901
6233271	72	88	1967	-80.0595075	39.9302972	0.051313904	68	2057.721784	0.007249026
6233272	75	13	1967	-63.1498	46.36766	0.038992092	47	1615.472577	0.004833529
6233273	76	2	1967	-75.54197	45.70991	0.046794286	68	2149.301125	0.006863301
6233274	67	19	1967	-98.6006019	35.8994217	0.037164316	34	1310.483246	0.004877532
6233275	72	89	1967	-79.4499739	39.9992837	0.036022787	55	1516.840792	0.00562785
6233276	76	22	1967	-71.07816	46.04703	0.042505898	56	1526.538606	0.006230719
6233277	67	22	1967	-94.6982489	36.9292257	0.052014569	58	1884.258268	0.007166311
6233278	72	96	1967	-76.8886949	39.9221277	0.043167627	47	1580.235164	0.004398339
6233279	76	58	1967	-70.419	48.42993	0.035934643	47	1284.151445	0.005551234
6233280	77	1	1967	-71.4546814	41.6039129	0.034687527	53	1378.642951	0.00626395
6233281	72	98	1967	-75.8171469	39.7862277	0.03423934	53	1785.928568	0.004029311
6233282	67	25	1967	-96.1208799	36.5716557	0.045081816	54	1902.93308	0.005959142
6233283	80	1	1967	-80.1081539	32.7927447	0.097280777	58	2150.808081	0.013566732
6233284	67	32	1967	-99.7284459	36.7098467	0.033492678	30	1119.277248	0.003708617
6233285	75	5	1967	-62.36825	46.31964	0.035219675	42	1440.333229	0.004965523
6233286	80	8	1967	-81.4906299	33.6937497	0.056985232	53	1584.573113	0.007966713
6233288	72	5	1967	-79.9582379	41.8051937	0.030889699	47	1627.213062	0.003725995
6233289	76	4	1967	-73.33089	45.08068	0.037810717	51	1743.274065	0.004109995
6233292	72	7	1967	-79.1302659	41.9993537	0.04279685	55	1632.874723	0.005275941
6233293	76	6	1967	-74.09216	45.78486	0.040464937	57	1658.790192	0.005231433
6233296	72	17	1967	-78.7387779	41.4207597	0.031287636	48	1432.18173	0.004685609
6233297	76	21	1967	-71.56199	46.6642	0.033104801	53	1576.505096	0.005191072
6233301	72	29	1967	-76.6638159	41.3121387	0.029027029	39	1477.815483	0.00306774
6233302	80	4	1967	-79.4348459	33.6458617	0.054380539	53	1602.069098	0.007499452
6233306	80	6	1967	-79.7849141	34.0240154	0.051702028	50	1501.740419	0.007312179
6233307	72	30	1967	-76.903319	41.8749574	0.030886947	48	1552.6129	0.003828432
6233310	72	37	1967	-75.3893569	41.1159967	0.034657042	56	1235.185798	0.007212325
6233314	72	51	1967	-79.6681819	40.4687597	0.018451441	31	1055.191362	0.002616111
6233320	72	68	1967	-77.6852029	40.3760787	0.05062598	60	1872.969596	0.006718661
6233325	72	71	1967	-77.8942099	40.6956947	0.04225825	52	1814.796129	0.005420216
6233327	72	92	1967	-78.2188889	39.8296047	0.039043215	49	1635.226427	0.004747782
6233332	72	94	1967	-77.4456949	39.9854797	0.024978561	39	1291.071175	0.003422995
6233337	75	9	1967	-63.52906	46.22164	0.02124747	41	1261.31983	0.004074844
6233341	76	1	1967	-76.11098	45.55411	0.03804829	64	1810.223938	0.005575084
6233345	76	23	1967	-70.93779	46.51041	0.036485105	52	1468.659842	0.004336076
6233350	76	40	1967	-70.08943	47.33844	0.034073727	53	1691.2864	0.004914427
6233354	77	2	1967	-71.2448829	41.4859497	0.030727918	44	1658.0682	0.00390327
6233360	80	2	1967	-79.6942904	33.2862522	0.059317503	51	1584.382838	0.008803812
6233363	80	9	1967	-81.3572843	33.7228886	0.059505356	52	1886.017565	0.007121052
6233367	80	12	1967	-80.5795979	34.1121757	0.062275301	61	2099.399513	0.008793234
6234455	35	15	1967	-86.0561139	40.2183267	0.030386575	44	1548.075333	0.003564747
6234457	35	22	1967	-87.1438756	39.5330205	0.044362044	56	1570.429813	0.005760034
6234460	36	6	1967	-90.2964159	41.9751747	0.034352272	47	1538.724566	0.003676891
6234463	36	14	1967	-94.0861889	41.7176327	0.04025093	54	1787.646943	0.004692604
6234466	36	16	1967	-95.3466186	41.1311292	0.027936102	48	1494.610999	0.004100325
6234468	36	17	1967	-90.6070319	42.0435847	0.030853734	43	1406.867765	0.003634225
6234470	36	20	1967	-92.4757027	42.4283168	0.030207158	42	1418.105852	0.00329399
6234473	36	27	1967	-95.7210459	42.6484757	0.026513816	40	1354.617355	0.003234435
6234476	38	8	1967	-98.8303289	37.9271847	0.039101504	43	1606.34941	0.004280406
6234478	38	9	1967	-98.8298029	37.5142707	0.038067818	43	1856.997093	0.003547343
6234481	38	18	1967	-97.2984479	38.9447217	0.034176814	41	1612.05271	0.003861201
6234483	38	19	1967	-97.1112208	39.0607981	0.034535601	52	1816.121983	0.004905758
6234489	38	29	1967	-96.0269519	39.7690906	0.034836044	51	1766.9099	0.004315267
6234492	39	8	1967	-85.7169959	36.8194377	0.034192056	46	1633.280624	0.004383058
6234495	39	18	1967	-83.7306599	37.5931367	0.037534399	47	1403.196868	0.005392184
6234498	39	19	1967	-83.9410399	37.9925897	0.051585827	58	1795.73244	0.00711114
6234500	39	28	1967	-86.1387677	37.2573275	0.066030043	69	2045.686145	0.008638838
6234502	39	29	1967	-86.8961593	37.8199855	0.048034372	54	1777.923083	0.006272592
6234505	39	39	1967	-84.8237459	38.7213307	0.049534031	58	1788.036012	0.00684509
6234508	39	40	1967	-84.1633637	38.4344957	0.048466201	60	1805.511622	0.00635745
6234511	39	41	1967	-84.5727271	38.3791569	0.053197756	61	1797.101401	0.008123745
6234514	39	42	1967	-84.027055	38.0304392	0.03449957	47	1560.937969	0.004468615
6234518	46	8	1967	-77.5489971	39.5780009	0.048568886	60	1745.796936	0.006568788
6234521	46	9	1967	-77.3304347	39.7148359	0.055890276	59	1909.393857	0.006057134
6234522	2	2	1967	-87.1912919	34.6386747	0.047991637	54	1673.406579	0.006380797
6234525	2	4	1967	-87.0592352	34.0297881	0.057365928	63	1940.866111	0.007850945
6234530	2	5	1967	-86.4934089	34.2016687	0.044176957	51	1767.461901	0.005508729
6234531	2	12	1967	-85.7511714	33.6076572	0.064134319	58	1677.816641	0.009678792
6234534	2	13	1967	-86.1153789	33.8116977	0.071891863	67	1905.175323	0.010443438
6234537	2	14	1967	-86.6010915	33.4549551	0.056877589	61	1834.206928	0.008310236
6234538	2	15	1967	-86.8721632	33.6822947	0.055627631	58	1611.583355	0.007696615
6234541	2	20	1967	-88.3172665	32.1307226	0.062497185	60	1988.626492	0.008149099
6234543	34	49	1967	-90.2587326	38.3851828	0.046376656	58	1835.468595	0.005691299
6234544	2	23	1967	-87.5153953	32.7846996	0.071946595	63	2029.804561	0.009071055
6234545	2	25	1967	-86.7017714	32.6594297	0.050631087	58	1733.637962	0.007532802
6234547	34	50	1967	-89.8193422	38.5256201	0.032647272	41	1451.970765	0.003547358
6234548	2	30	1967	-85.5895835	31.3388298	0.035735632	35	1440.115743	0.004059992
6234549	34	52	1967	-89.6602444	38.6699717	0.041397725	53	1781.349241	0.004958442
6234551	2	32	1967	-85.8156189	31.7165541	0.04797468	47	1560.126405	0.005647428
6234552	2	33	1967	-86.250378	31.5859083	0.041868925	46	1572.543254	0.006166479
6234553	35	2	1967	-87.2001879	41.3297597	0.040834513	54	1725.713022	0.0046938
6234555	7	1	1967	-91.8906744	33.3121558	0.075341482	64	1992.431783	0.009404617
6234557	35	9	1967	-84.9394079	41.6024567	0.036655551	50	1630.007388	0.00428476
6234558	7	7	1967	-94.1229479	33.6969877	0.064058978	55	1828.47027	0.008048239
6234559	7	10	1967	-91.4995419	34.0487397	0.05058143	40	1300.277075	0.005305339
6234560	35	10	1967	-87.3633993	40.6790779	0.032122819	47	1526.970512	0.004394277
6234562	7	11	1967	-92.7855459	34.6176687	0.068343218	60	1644.287688	0.009298152
6234563	35	20	1967	-84.8534885	40.7030618	0.032320562	45	1511.146538	0.003592266
6234565	7	16	1967	-90.6809479	35.4848667	0.04167293	45	1568.110105	0.005073557
6234566	7	17	1967	-90.2869869	35.5182337	0.039494032	34	1254.710395	0.004348465
6234567	35	29	1967	-85.4421615	39.4677041	0.045841007	52	1781.334601	0.00492317
6234569	7	20	1967	-92.7182699	35.6330837	0.049356959	58	1780.125798	0.007551423
6234571	35	39	1967	-86.1463592	38.2672943	0.054069663	60	1600.974903	0.007636531
6234572	7	25	1967	-90.9236529	36.4436877	0.040697218	44	1606.926128	0.004648127
6234573	7	26	1967	-91.7354059	36.0989147	0.040954547	47	1623.60314	0.005674439
6234574	36	1	1967	-91.6797963	40.7698922	0.040019703	55	1639.363374	0.005197442
6234576	7	27	1967	-92.1148009	36.4061087	0.046513207	55	1784.79721	0.00662191
6234578	36	8	1967	-91.2514429	41.7290747	0.037863694	46	1668.734609	0.004244741
6234579	18	8	1967	-73.2167392	41.5493443	0.048615248	67	1760.745325	0.007463111
6234581	21	1	1967	-75.6860679	39.5003037	0.045899384	57	1848.610008	0.006580393
6234582	36	13	1967	-94.1444549	41.6586017	0.034460548	50	1590.110772	0.004076277
6234583	21	3	1967	-75.5366119	38.9594417	0.084935811	76	2338.314583	0.016717578
6234585	21	6	1967	-75.1803229	38.5337387	0.051808797	58	1888.205564	0.007357207
6234586	36	18	1967	-91.6954359	42.2103447	0.028881471	40	1389.163054	0.003306024
6234588	21	10	1967	-75.2899489	38.7480537	0.055692746	55	1843.103363	0.006210194
6234589	36	23	1967	-93.3290179	42.1521897	0.025964246	36	1402.231184	0.002756376
6234591	25	2	1967	-86.2758321	30.3755433	0.055285263	35	1389.947025	0.007518017
6234593	25	4	1967	-85.1334541	30.5288404	0.072360618	50	1758.733292	0.008500351
6234594	36	24	1967	-94.571273	42.041859	0.036160728	41	1516.080355	0.003038024
6234595	25	5	1967	-85.2869789	30.3372497	0.056879816	45	1635.003329	0.007079804
6234597	38	13	1967	-94.8714265	38.8545319	0.034552826	53	1784.656487	0.004713106
6234598	25	7	1967	-85.9004499	30.3898527	0.061643603	52	1811.117773	0.007919997
6234600	38	14	1967	-95.9097289	38.9715017	0.037851733	44	1541.411415	0.004200348
6234601	25	14	1967	-82.394802	29.1916199	0.097557112	55	2156.10332	0.011363842
6234603	38	16	1967	-96.9002609	38.9939527	0.048258041	59	2044.038715	0.006959638
6234604	25	17	1967	-82.1186659	27.4438745	0.053079436	40	1630.599566	0.009133892
6234605	25	22	1967	-81.8605659	28.1788407	0.095514372	53	2056.757276	0.010776364
6234606	38	23	1967	-99.4663929	38.8417547	0.022253254	29	1341.774489	0.002245689
6234608	25	23	1967	-81.9816829	28.5723877	0.344188051	55	2441.01802	0.071699981
6234609	38	24	1967	-101.6508259	38.7278307	0.029954159	30	1223.301338	0.003004971
6234612	25	32	1967	-81.9372109	26.7792597	0.308637233	50	2146.030747	0.071042094
6234614	38	31	1967	-97.6123773	39.1902871	0.036904658	45	1610.429793	0.005686065
6234615	25	33	1967	-80.4312659	26.0628347	0.048494021	38	1708.501487	0.008799919
6234616	27	5	1967	-82.3558447	31.9696201	0.079930635	66	2168.448974	0.010484848
6234618	38	33	1967	-98.1009369	39.7262207	0.027027871	38	1445.893212	0.003009688
6234619	27	6	1967	-84.5234609	30.8199147	0.08655464	57	1826.865973	0.008313788
6234621	38	34	1967	-99.2540059	39.7702227	0.028731769	39	1460.758273	0.003307244
6234622	27	7	1967	-83.2438622	31.7059705	0.034643157	40	1481.510452	0.004418806
6234624	39	7	1967	-86.2041469	36.9336087	0.049943405	61	1923.158966	0.006486369
6234625	27	15	1967	-83.9907256	33.0058447	0.038163343	37	1345.588948	0.004555382
6234626	27	20	1967	-83.1735057	33.7540376	0.050844529	50	1640.993597	0.006651846
6234628	34	51	1967	-89.5364836	38.6981367	0.044397475	51	1702.281412	0.005131536
6234629	27	30	1967	-83.5415723	34.4948364	0.057184233	62	1720.996498	0.00836252
6234630	35	3	1967	-86.2170269	41.7272707	0.034253175	46	1361.02915	0.004409655
6234632	27	31	1967	-83.0957341	33.5197045	0.063914653	65	2004.221479	0.008799355
6234633	34	5	1967	-88.175335	42.1542181	0.028966044	41	1542.378813	0.003148232
6234634	35	8	1967	-85.8354799	41.1015477	0.044583786	59	1740.440559	0.005926945
6234636	34	14	1967	-88.1879809	41.9335847	0.029789913	47	1579.804834	0.003748785
6234637	35	16	1967	-85.5449749	40.0330447	0.040979342	54	1758.201781	0.004945224
6234639	34	22	1967	-90.9814019	40.6514497	0.027628171	41	1335.210419	0.003453115
6234641	34	24	1967	-90.5087794	40.8602881	0.028747229	33	1321.436065	0.002462391
6234642	35	26	1967	-86.7031329	39.2638847	0.053297212	57	1875.544007	0.005615827
6234643	34	33	1967	-87.9675978	40.2509834	0.031507207	35	1441.290396	0.002754919
6234645	35	31	1967	-84.9764184	39.493804	0.051153307	57	1786.980288	0.006060106
6234646	34	34	1967	-87.724604	40.6463646	0.035518226	46	1592.292329	0.003964909
6234647	35	40	1967	-85.0940693	38.7795826	0.052003572	62	2006.580349	0.006734463
6234651	35	42	1967	-87.4410458	37.9911389	0.046507024	57	1945.875558	0.00559225
6234654	36	5	1967	-95.1210189	40.6203037	0.031457886	48	1496.749295	0.004270939
6234658	36	10	1967	-92.2602299	41.6735997	0.039153806	46	1584.548108	0.004187557
6234661	36	22	1967	-93.8524963	42.9663334	0.032614398	34	1308.695066	0.002627252
6234664	36	25	1967	-94.295246	42.6019638	0.027604993	35	1307.295889	0.002512746
6234667	38	5	1967	-96.2857509	38.0573017	0.042968721	51	1877.730432	0.006688474
6234671	38	15	1967	-95.8576087	38.5354618	0.041309605	50	1826.811015	0.005068284
6234674	38	22	1967	-99.6617889	38.2040337	0.036183248	48	1777.582723	0.004334041
6234679	38	25	1967	-100.3295925	39.5831024	0.023915656	33	1300.831129	0.002828128
6234682	38	32	1967	-98.7508415	39.3447742	0.029186047	37	1538.217692	0.003155586
6234685	39	4	1967	-87.9605863	36.792622	0.045550138	51	1786.251049	0.005324589
6234688	39	23	1967	-84.8137054	37.9849668	0.046064139	57	1787.095504	0.00583633
6234691	39	24	1967	-85.7375639	37.5833107	0.042760037	56	1885.995559	0.005808089
6234694	39	33	1967	-87.6776119	37.5933277	0.042808509	50	1734.012896	0.005378502
6234697	39	38	1967	-85.5587469	38.4108577	0.05561406	67	1933.170625	0.007727369
6234700	39	45	1967	-83.0920869	38.4189637	0.033664051	39	1099.051302	0.004692074
6234706	42	7	1967	-93.1346739	29.8271777	0.074538477	41	1716.432736	0.013006853
6234709	42	9	1967	-90.5110779	30.7018587	0.067512522	55	1747.481588	0.009421797
6234713	42	17	1967	-91.6715765	31.1887275	0.061673796	61	1983.987365	0.007820145
6234718	42	19	1967	-92.963258	31.5639297	0.058095507	51	1911.225615	0.006311089
6234721	42	27	1967	-93.9744951	32.0735964	0.066546657	60	1890.220298	0.008126581
6234724	44	28	1967	-67.948462	44.7196649	0.037128155	53	1516.765224	0.006136691
6234727	44	45	1967	-67.7273933	45.5726168	0.051358046	66	1756.138433	0.007163798
6234735	45	9	1967	-100.12712	49.34073	0.01709637	29	1088.012262	0.002281033
6234740	46	3	1967	-79.1698659	39.4387843	0.052624452	73	1928.596805	0.008722771
6234744	46	13	1967	-77.0384304	39.516536	0.050331839	61	1732.212443	0.006453351
6234747	2	1	1967	-87.6041417	34.868688	0.055703828	56	1757.292134	0.006551433
6234751	2	6	1967	-86.6855493	34.5012877	0.047267194	56	1857.196525	0.006076993
6234754	2	8	1967	-85.7110414	34.0278089	0.047908346	51	1608.617554	0.006122392
6234758	2	11	1967	-85.7518379	33.6257237	0.040471349	49	1580.678705	0.005839668
6234762	2	16	1967	-87.5888357	33.8481773	0.050176599	54	1699.257483	0.006985489
6234766	2	24	1967	-86.2754989	32.1312407	0.043318465	47	1682.073479	0.005226813
6234770	2	26	1967	-86.1307777	32.5890245	0.044244993	44	1602.065222	0.005531481
6234772	2	31	1967	-85.2112631	31.0081277	0.044707518	38	1561.910978	0.004501601
6234776	2	34	1967	-86.6131969	31.4439507	0.048680203	43	1353.890889	0.0067293
6234780	2	36	1967	-87.2090516	31.7399574	0.058876083	53	1662.172148	0.007653734
6234784	2	40	1967	-88.1125479	30.2540327	0.155029028	55	2042.459045	0.019724918
6234788	7	3	1967	-92.5979989	33.9045937	0.065599834	61	1732.324745	0.009386373
6234790	7	4	1967	-92.6974039	33.5907857	0.063216673	61	1814.657162	0.009360037
6234794	7	6	1967	-93.6694105	33.6627163	0.056494918	61	1904.623149	0.007697058
6234798	7	13	1967	-93.2513959	34.0344927	0.047698669	48	1486.817435	0.006076311
6234806	7	21	1967	-92.1956399	35.5702167	0.062115891	69	2137.027686	0.008475353
6234808	7	23	1967	-93.0696409	35.7806777	0.05534547	57	1627.776685	0.008439532
6234812	7	24	1967	-94.3318236	35.3514159	0.051457587	55	1683.334698	0.007196232
6234816	18	2	1967	-72.9096309	41.6976407	0.037526563	62	1667.940705	0.007103541
6234820	21	2	1967	-75.5873207	39.7518831	0.039168093	53	1910.977156	0.005170493
6234824	21	5	1967	-75.4593569	39.0295357	0.058802422	55	1819.55775	0.009008316
6234826	21	7	1967	-75.2351089	38.6735427	0.049045954	62	2009.237246	0.006905824
6234830	25	1	1967	-87.4079434	30.9291812	0.093751575	54	1890.388743	0.008871123
6234833	25	3	1967	-86.4809129	30.5193157	0.064962795	40	1439.69618	0.007348594
6234837	25	6	1967	-84.0413094	30.5950194	0.069248943	58	2045.690068	0.008310344
6234842	25	11	1967	-83.3782062	29.6686989	0.107737188	52	1909.144921	0.014827625
6234846	25	13	1967	-82.2630299	29.5468457	0.098087726	59	2188.05926	0.008667542
6234854	25	18	1967	-81.3438119	29.8899427	0.07160206	53	2002.41272	0.011707716
6234857	25	21	1967	-81.8343049	29.8970697	0.054953166	44	1652.50415	0.006978862
6234860	25	24	1967	-81.4189503	27.3232866	0.389862533	48	2020.392102	0.076340418
6234864	25	26	1967	-81.448561	26.2943143	0.086800463	50	2180.129879	0.010011511
6234868	25	31	1967	-80.3854635	26.9657323	0.05057019	38	1619.74248	0.008594764
6234871	25	36	1967	-80.5364609	25.0015697	2.976205977	38	1682.811015	0.06549584
6234874	25	38	1967	-81.8070759	30.0999027	0.067369154	58	1940.785215	0.009166268
6234878	27	3	1967	-81.4181496	31.3641465	0.086211135	58	2153.145655	0.011817188
6234882	27	11	1967	-81.3595879	32.3437127	0.042090347	45	1485.342418	0.006330347
6234887	27	14	1967	-83.4524425	32.3986852	0.061753328	55	2014.711678	0.008163945
6234892	27	24	1967	-83.3156813	34.0324127	0.043164836	48	1577.018924	0.005955406
6234896	27	34	1967	-81.637766	32.8829954	0.079358319	50	1638.322943	0.007151146
6234900	34	2	1967	-89.3321502	42.1593177	0.037092701	52	1614.002132	0.004444568
6234904	34	9	1967	-89.4568609	41.1849333	0.03305384	50	1575.317228	0.00423938
6234908	34	10	1967	-89.7704347	41.3504896	0.037660587	57	1780.552426	0.004843789
6234912	34	17	1967	-87.5816027	41.2187664	0.032927641	48	1502.26731	0.004046697
6234916	34	27	1967	-89.3175167	40.6045464	0.034194824	48	1689.281885	0.004127196
6235291	34	44	1967	-88.103613	39.8947071	0.025457672	35	1374.325119	0.002747806
6235294	34	56	1967	-88.1676148	38.70688	0.041874166	53	1762.326691	0.00677607
6235298	36	9	1967	-92.3572989	41.8190707	0.033584998	44	1496.217414	0.003656829
6235300	36	19	1967	-91.4172439	42.1986127	0.028046133	41	1350.682418	0.003443528
6235304	38	1	1967	-94.9950424	37.0321381	0.03748407	48	1696.677998	0.005167976
6235308	38	2	1967	-95.3249979	37.5148587	0.028457087	37	1460.525927	0.003678324
6235312	38	12	1967	-101.4316489	37.9589257	0.035216836	35	1523.03572	0.003237978
6235316	38	17	1967	-96.5605733	38.3623234	0.037549463	44	1668.715818	0.004213153
6235318	38	20	1967	-98.9776363	38.4636553	0.055783071	51	1781.931578	0.006560524
6235322	38	21	1967	-98.0351929	38.5515107	0.031926867	47	1703.779786	0.004077253
6235326	38	26	1967	-95.5671042	39.0805438	0.03758044	45	1544.863104	0.004671245
6235334	38	35	1967	-99.6464549	39.7266067	0.02776907	41	1562.430975	0.003293354
6235337	39	1	1967	-83.7017979	36.6082857	0.050648417	58	1707.153426	0.007270453
6235340	39	2	1967	-88.8622638	36.9068375	0.063780137	56	1922.232154	0.007041272
6235344	39	3	1967	-88.1808759	36.6896267	0.04757838	54	1773.467102	0.006065979
6235348	39	6	1967	-86.6314152	36.9907469	0.04648614	55	1762.186485	0.005789103
6235352	39	16	1967	-83.9929579	37.4310467	0.03543124	46	1363.424451	0.00483083
6235355	39	20	1967	-84.5585649	37.8823347	0.046773728	59	1760.633563	0.006408406
6235360	39	21	1967	-84.6612332	37.390468	0.051687824	63	1943.393181	0.006909732
6235363	39	26	1967	-85.0956126	37.9353872	0.044421115	55	1774.231557	0.005853228
6235372	39	31	1967	-86.0179129	37.6179677	0.049701348	60	1868.243278	0.007061024
6235376	39	37	1967	-85.2054969	38.2768507	0.043563883	56	1866.671518	0.005228089
6235380	42	4	1967	-90.0971379	29.6921337	0.068256754	51	1907.264031	0.010275057
6235384	42	5	1967	-91.2167209	29.9075617	0.07696932	34	1419.262114	0.005381307
6235387	42	13	1967	-92.4323199	30.6522117	0.028569557	33	1388.322018	0.003077157
6235391	42	15	1967	-93.3426979	30.0082047	0.056978159	40	1718.221131	0.010471354
6235395	42	20	1967	-92.29532	31.46457	0.071596346	50	1764.240542	0.009263856
6235399	42	22	1967	-93.1721339	31.0143597	0.053183613	50	1556.961502	0.008018204
6235404	42	23	1967	-91.7299813	32.7618191	0.0562312	54	1807.780654	0.006729481
6235408	42	25	1967	-92.3123249	32.2555287	0.058186726	52	1539.20147	0.008442903
6235411	44	4	1967	-70.7139509	43.0811777	0.03349247	51	1671.977283	0.005508449
6235415	45	3	1967	-97.68673	49.51762	0.029638357	39	1369.387292	0.002826035
6235419	45	5	1967	-98.02424	49.38436	0.02552928	42	1384.449119	0.002982884
6235427	45	14	1967	-97.0518	50.01089	0.033406256	45	1584.85188	0.004683717
6235432	45	24	1967	-100.55731	51.50735	0.016898455	30	1315.481521	0.001909737
6235435	46	1	1967	-79.1557785	39.5041468	0.06443698	78	2121.673776	0.009969854
6235442	46	6	1967	-77.8655019	39.6129717	0.042115599	49	1487.664252	0.005095016
6235444	46	11	1967	-77.0930269	39.1514457	0.054470298	61	1839.790217	0.00682805
6235448	2	38	1967	-87.1203132	31.3180673	0.055220946	53	1712.119923	0.007955331
6235452	7	9	1967	-91.7000729	34.7079957	0.034005162	35	1343.661143	0.003818553
6235456	7	18	1967	-91.3577789	35.3146747	0.036049193	42	1395.842265	0.004621076
6235460	7	19	1967	-91.3426352	35.9114603	0.039016515	48	1518.78513	0.005106627
6235464	7	28	1967	-93.2802279	36.1206137	0.050125659	61	1654.255284	0.007295019
6235468	18	7	1967	-72.1354049	41.7771877	0.039306602	58	1447.399269	0.006160924
6235472	18	10	1967	-73.6169339	41.0517897	0.03895168	53	1490.467701	0.005825005
6235477	21	8	1967	-75.4329779	38.5040567	0.081095878	63	1903.841714	0.021091556
6235481	21	9	1967	-75.0612969	38.5804577	0.08823987	62	2117.339623	0.014283022
6235485	25	28	1967	-80.9676799	25.7510497	0.072065312	42	1826.154454	0.007996759
6235488	27	38	1967	-84.5636584	32.3152912	0.052003392	50	1538.635748	0.007158677
6235492	34	39	1967	-90.8395322	39.3609974	0.039780413	54	1764.467719	0.005304565
6235640	39	12	1967	-89.0589229	36.8458967	0.088294095	72	2036.883218	0.010727755
6235643	39	17	1967	-83.6101219	37.7613187	0.037907794	49	1404.158757	0.005564187
6235647	39	22	1967	-84.8112865	37.470864	0.053743714	65	1906.141866	0.007571883
6235652	39	25	1967	-85.1284099	37.4126457	0.06067784	66	2010.752712	0.008144106
6235655	39	30	1967	-86.2962376	37.5961302	0.053403599	64	1798.70382	0.008273014
6235659	39	35	1967	-87.6947489	37.7163597	0.040891002	52	1640.70594	0.005082323
6235664	39	46	1967	-83.0511849	38.4666117	0.034242923	43	1498.888879	0.00488095
6235668	42	3	1967	-90.9214239	29.9029097	0.046215897	39	1474.293578	0.005678781
6235672	42	6	1967	-92.8109049	29.7375687	0.081966707	31	1467.119788	0.008278451
6235676	42	11	1967	-91.8208203	30.0641124	0.030172877	35	1389.65641	0.003642785
6235680	42	14	1967	-92.4607919	30.7607257	0.042025543	45	1600.128742	0.005728047
6235682	42	16	1967	-93.3184289	30.8315727	0.044113027	42	1505.63194	0.005328327
6235686	42	18	1967	-91.4440435	31.9792958	0.039420477	44	1627.225921	0.004844146
6235691	42	21	1967	-93.0409919	31.5890857	0.056029005	49	1673.303216	0.006567642
6235695	42	24	1967	-91.6538661	32.3944346	0.04319731	41	1598.407686	0.005102501
6235700	44	19	1967	-69.4360208	44.9876199	0.02753373	51	1282.487426	0.004176223
6235705	44	22	1967	-68.9653549	44.8325017	0.056027619	68	1836.218406	0.007939494
6235709	44	37	1967	-69.4418239	45.0210757	0.036618676	53	1630.586197	0.004573251
6235713	45	1	1967	-95.97518	49.87065	0.032206765	49	1669.353463	0.004136974
6235717	45	11	1967	-101.34963	49.77591	0.041828039	52	1646.154688	0.004970028
6235722	45	16	1967	-98.21579	50.72751	0.058617823	67	2268.339847	0.005956445
6235726	45	18	1967	-99.97931	50.19625	0.058517144	68	2000.776122	0.007004111
6235735	46	7	1967	-77.5681548	39.6486494	0.031180063	44	1439.888993	0.004017608
6235740	46	10	1967	-77.0157189	39.0309157	0.041763994	56	1792.718453	0.005627419
6235743	2	7	1967	-86.2030371	34.8680404	0.044703346	51	1497.248968	0.006176851
6235746	2	9	1967	-85.9267589	34.3039507	0.05671219	58	1816.163342	0.007368312
6235750	2	10	1967	-85.9258408	33.1913463	0.043794783	49	1767.714259	0.00561029
6235753	2	17	1967	-87.0044623	33.5263185	0.067201156	65	1906.200703	0.009066707
6235756	2	19	1967	-88.1712189	33.4765537	0.052543938	58	1735.233685	0.007995474
6235759	2	27	1967	-85.5530853	32.3116131	0.059927222	54	1792.922065	0.008192141
6235762	2	29	1967	-85.0626449	32.1473077	0.036456956	43	1331.826564	0.004708153
6235765	2	35	1967	-86.8858316	30.9977072	0.0490535	46	1418.552735	0.007260849
6235768	2	37	1967	-87.8321999	31.0969767	0.063815649	50	1748.134426	0.007038862
6235771	2	41	1967	-87.5183809	30.2818577	0.055455532	45	1648.99989	0.009729059
6235774	7	2	1967	-91.3322519	33.1683737	0.051027224	48	1715.380986	0.005896238
6235778	7	5	1967	-93.4706879	33.3755757	0.056060835	57	1826.245974	0.00774199
6235781	7	12	1967	-92.6636599	34.3401497	0.058698422	62	1856.403764	0.008132038
6235786	7	15	1967	-94.0440279	34.9704407	0.039151402	36	1186.337807	0.005253288
6235789	7	22	1967	-93.6640897	35.4263985	0.035094279	40	1331.659444	0.004537033
6235792	7	29	1967	-94.1100149	36.4053037	0.05673524	66	1962.517354	0.008771572
6235795	18	3	1967	-72.5159969	41.7026037	0.037015032	54	1551.215506	0.005737872
6235799	21	4	1967	-75.4652999	39.0287137	0.054546152	61	1932.465607	0.006871909
6235802	25	9	1967	-85.3003555	29.7818335	0.126319368	38	1432.832345	0.014725005
6235806	25	10	1967	-83.8569684	30.2734632	0.085497473	47	1840.527356	0.0077768
6235808	25	12	1967	-82.7337409	30.5026237	0.070915166	57	1873.867131	0.011943301
6235811	25	19	1967	-81.9062085	30.7202649	0.055344946	51	1824.625256	0.007769302
6235816	25	20	1967	-82.3022052	28.3266818	0.083420839	50	2121.372518	0.006056574
6235819	25	27	1967	-82.1462286	27.6610372	0.035205889	38	1645.163439	0.007194578
6235822	25	30	1967	-80.9673345	27.9626301	0.080322689	45	2010.005076	0.008653974
6235827	27	9	1967	-84.9734875	31.8866376	0.057676226	56	1802.056487	0.007697195
6235830	27	10	1967	-84.7198949	31.7456477	0.085867941	52	1761.461078	0.007972789
6235835	27	12	1967	-82.3706809	32.1082297	0.049991559	46	1645.450423	0.006535818
6235837	27	19	1967	-82.4803579	33.7890197	0.045825248	48	1559.149169	0.005956998
6235840	34	1	1967	-90.0603721	42.2101956	0.026709698	41	1285.248426	0.003329798
6235847	34	8	1967	-90.217325	41.4846401	0.038617398	53	1663.395268	0.004495284
6235850	34	18	1967	-87.964599	41.4686591	0.041298791	56	1955.380233	0.004643089
6235854	34	28	1967	-89.4243639	40.4972564	0.038712529	49	1526.834251	0.004695328
6235858	34	36	1967	-90.3451209	39.9897988	0.035052825	49	1590.252168	0.004422883
6235862	34	38	1967	-90.4109104	39.799577	0.04613485	59	2025.521073	0.005462572
6235864	34	40	1967	-89.5158088	39.5753678	0.048687923	58	1867.084019	0.005462939
6235977	81	2	1967	-97.8751124	43.284162	0.033353573	38	1529.019796	0.003281625
6235980	81	12	1967	-97.6708995	44.0157709	0.044159086	45	1731.436552	0.004625011
6235982	82	1	1967	-89.4379279	36.4175101	0.043447933	51	1580.994125	0.005527273
6235985	82	11	1967	-88.9027887	35.9420253	0.038927742	46	1516.70664	0.004984483
6235989	82	40	1967	-83.9205469	35.9074137	0.041798211	49	1531.120972	0.0054686
6235992	82	41	1967	-82.9128272	36.0465477	0.049392097	52	1650.43118	0.005930972
6235995	82	42	1967	-82.077152	36.3180044	0.045162622	61	1595.397236	0.007761308
6235998	83	10	1967	-99.1983419	27.1762967	0.113361151	56	2151.016167	0.013576124
6236001	83	41	1967	-98.7351553	30.9594551	0.043428373	28	1326.166403	0.004566736
6236004	83	60	1967	-96.1349747	32.5698812	0.048420357	45	1850.721276	0.005223484
6236008	83	61	1967	-96.8055652	32.7295462	0.045130252	38	1532.897257	0.004784793
6236011	83	62	1967	-97.8146904	32.2930094	0.056984195	45	1776.189078	0.007378227
6236014	83	70	1967	-95.8107075	33.0520824	0.029303589	32	1313.572487	0.003995606
6236017	83	85	1967	-100.9172129	31.1844187	0.044060745	36	1400.736708	0.007048943
6236021	87	4	1967	-72.8507919	43.2885447	0.031082651	50	1392.772655	0.004958718
6236025	87	9	1967	-73.0190299	43.4057997	0.035955944	58	1595.945215	0.005299829
6236029	87	18	1967	-72.3458975	44.563679	0.036206357	64	1590.168145	0.006557873
6236036	88	4	1967	-79.1647743	38.1909534	0.049909878	65	2138.062844	0.006068867
6236040	88	15	1967	-80.0474493	37.8008166	0.063791874	76	1940.698814	0.0097541
6236044	88	17	1967	-79.873929	37.4881381	0.033047173	44	1286.649401	0.005040556
6236048	88	24	1967	-78.9826802	37.3326887	0.046656103	56	1789.896054	0.006143441
6236052	88	25	1967	-77.8286969	37.2478937	0.05064294	54	1483.81046	0.00745465
6236056	88	26	1967	-77.8218239	37.9811797	0.067861844	71	2211.227048	0.008791287
6236061	88	27	1967	-77.161373	37.1028557	0.048222716	51	1471.300911	0.006762173
6236065	88	30	1967	-76.6789481	37.8800004	0.056127854	62	1802.034818	0.007920946
6236072	90	13	1967	-82.5986473	38.1939311	0.047396313	56	1629.177768	0.007163832
6236192	56	9	1967	-66.51451	47.40475	0.045641955	57	1324.575521	0.007128594
6236196	56	18	1967	-67.5403	46.35704	0.051125617	63	1713.590428	0.007220844
6236200	56	41	1967	-65.79995	45.63438	0.05840213	76	2073.498662	0.008891144
6236205	80	19	1967	-81.9796069	35.0827867	0.042957533	45	1433.420421	0.005644562
6236208	81	1	1967	-96.8856776	43.3306215	0.03266244	42	1578.515685	0.003617483
6236211	81	8	1967	-100.8980976	43.2008645	0.049885546	48	1745.585671	0.004790906
6236214	81	11	1967	-97.9423379	44.9067977	0.054684931	49	1740.047745	0.005219432
6236217	81	13	1967	-98.3160719	44.5010807	0.031708837	41	1555.162999	0.002941834
6236221	81	18	1967	-97.3322679	45.8489747	0.036253102	42	1602.305803	0.00395396
6236224	81	21	1967	-98.2072749	45.1555417	0.052993245	55	1828.785357	0.005498059
6236227	81	23	1967	-99.2629045	45.8541675	0.059474826	46	1554.471186	0.005215061
6236231	81	28	1967	-103.1333309	44.5118757	0.051055438	43	1772.015889	0.004299188
6236234	82	2	1967	-89.3646928	36.3065622	0.051235509	45	1533.273264	0.005732427
6236237	82	10	1967	-88.8148959	35.3431047	0.034323747	40	1466.48696	0.004203807
6236242	82	12	1967	-88.8621969	35.8134197	0.043490639	48	1546.550108	0.005579641
6236244	82	19	1967	-86.3315439	36.3259217	0.049595033	58	1940.055219	0.006607981
6236248	82	20	1967	-86.6658089	36.5086597	0.03862146	50	1650.235702	0.005281961
6236252	82	22	1967	-86.8259959	35.8589627	0.038011196	51	1660.928412	0.005853403
6236255	82	29	1967	-85.6693511	35.1735485	0.046203967	56	1499.098024	0.00714044
6236261	82	30	1967	-85.1467589	35.2998357	0.041878753	52	1558.452705	0.005794266
6236264	82	39	1967	-83.8099149	35.7304657	0.055686787	67	1779.432107	0.009151685
6236267	83	28	1967	-98.6494589	29.8739777	0.045822592	37	1472.341526	0.022336737
6236270	83	38	1967	-97.6927799	30.6641337	0.051967173	37	1531.606364	0.006555391
6236274	83	47	1967	-95.8497329	31.5525947	0.03812743	42	1606.47542	0.00469263
6236277	83	65	1967	-98.389974	32.9898499	0.059261048	48	1785.225868	0.00763341
6236280	83	75	1967	-97.2713009	33.5610847	0.046293965	50	1678.634098	0.00607442
6236283	83	82	1967	-103.0065204	29.1904253	0.066166546	29	1172.205761	0.006069423
6236286	83	100	1967	-102.249269	35.7506355	0.043106878	34	1523.254324	0.005126745
6236289	87	7	1967	-72.2608612	43.8966381	0.037100727	63	1485.418527	0.00684056
6236292	87	8	1967	-73.1953659	43.0090337	0.030527952	52	1396.250611	0.004978361
6236295	87	15	1967	-72.4028527	44.3378666	0.040197049	52	1149.413104	0.007174527
6236299	87	17	1967	-72.3791513	44.5503853	0.034610239	49	1706.658984	0.004230476
6236301	88	21	1967	-78.6894059	37.8976577	0.061850962	65	1684.249624	0.008936299
6236305	88	28	1967	-77.6223439	37.2171627	0.055912065	62	1708.082106	0.008130729
6236307	88	34	1967	-82.8230979	36.6848357	0.04314998	51	1325.000261	0.00625793
6236311	88	45	1967	-76.0845349	36.6122367	0.054668898	58	1819.669771	0.007568361
6236315	90	12	1967	-82.0947269	38.7324167	0.05343811	57	1803.024343	0.006884909
6236462	56	13	1967	-64.83911	46.99828	0.043097823	63	1643.152829	0.007747081
6236466	56	14	1967	-65.22097	47.80494	0.043055777	55	1453.73097	0.006728511
6236470	56	21	1967	-66.9302	46.40997	0.05764405	72	1734.399841	0.009053352
6236474	56	33	1967	-67.42583	45.33027	0.039812304	53	1152.217601	0.006525176
6236479	56	42	1967	-65.04924	45.76289	0.055814065	76	1687.812979	0.008878443
6236482	58	3	1967	-72.1685998	42.8007764	0.041607243	59	1707.681784	0.005827964
6236487	58	4	1967	-70.9134599	43.2321417	0.046556427	69	1975.970695	0.007686856
6236490	58	13	1967	-72.3814817	43.0263963	0.030572756	50	1419.50805	0.00474993
6236494	58	14	1967	-72.2121162	43.0768236	0.041008425	69	1759.111323	0.007120125
6236499	59	2	1967	-75.3494715	39.3852634	0.04832485	56	1797.582142	0.00572874
6236502	59	5	1967	-74.2280982	39.9994195	0.034859336	48	1548.908784	0.004780796
6236510	59	15	1967	-74.5975039	40.1964127	0.026333509	42	1440.60373	0.00345945
6236514	61	4	1967	-73.501859	40.624322	0.045729575	41	1448.934123	0.00925431
6236517	61	16	1967	-73.4115969	42.3497047	0.043235199	61	1782.444119	0.007033173
6236519	61	24	1967	-74.927578	42.386341	0.031877932	53	1345.477542	0.005142976
6236523	61	33	1967	-75.8032509	42.0123327	0.037692097	56	1521.161102	0.005807248
6236527	61	45	1967	-77.939947	42.282132	0.03755748	61	1855.911424	0.004977966
6236531	61	47	1967	-77.118887	42.904651	0.042864693	63	1957.685944	0.005610958
6236536	61	52	1967	-77.9559089	42.6940897	0.039783135	59	1661.908096	0.006621886
6236541	61	55	1967	-78.178397	42.619592	0.042238536	59	1877.862045	0.004721166
6236545	61	57	1967	-78.3611669	42.5957057	0.049731062	64	1822.882679	0.006980558
6236548	61	60	1967	-78.2391139	42.4845267	0.042730667	61	1835.136267	0.006284172
6236552	61	62	1967	-79.4116839	41.9986107	0.047700751	61	1673.329568	0.006356206
6236556	61	65	1967	-79.0022969	43.2572547	0.03327902	49	1799.08831	0.003769079
6236559	61	72	1967	-76.110868	43.651181	0.034789926	45	1330.223673	0.004013016
6236563	61	75	1967	-75.9023929	43.4558097	0.041150912	68	1695.761166	0.007356838
6236567	61	88	1967	-74.0622389	43.6884937	0.034386802	58	1485.162341	0.006030706
6236571	61	91	1967	-73.5108119	43.0332427	0.04525386	67	1900.970272	0.006724692
6236575	61	101	1967	-74.7968689	44.0889227	0.038936734	50	1339.424181	0.007049327
6236579	61	111	1967	-78.584377	42.084342	0.035073335	58	1475.99668	0.005682813
6236583	63	8	1967	-76.9029469	35.0480767	0.06197999	52	1531.777937	0.008112926
6236587	63	14	1967	-79.4688523	35.9898149	0.048007295	58	1719.333877	0.006836982
6236590	63	16	1967	-80.9241249	35.6938367	0.034375367	42	1349.713481	0.004551222
6236656	80	14	1967	-81.4124759	34.1960217	0.054467161	56	1882.347393	0.008061749
6236661	80	16	1967	-82.6769029	34.7060587	0.034412875	43	1403.812687	0.004773816
6236664	81	4	1967	-98.6458819	43.8312097	0.057440433	52	1849.988697	0.005905174
6236667	81	5	1967	-98.7072332	43.1834022	0.026449771	38	1519.389806	0.003219211
6236670	81	14	1967	-98.4322579	44.0386067	0.039111546	39	1495.738979	0.004140588
6236674	81	15	1967	-99.2503172	44.121783	0.043544811	38	1399.144584	0.004544794
6236677	81	16	1967	-99.5004818	44.1738082	0.046543133	30	1243.99336	0.003763716
6236680	81	17	1967	-96.7190699	45.4278547	0.047388998	60	1994.024785	0.00532452
6236684	81	26	1967	-102.5874329	44.0210147	0.038849204	36	1418.020174	0.003581942
6236686	81	27	1967	-103.6533359	44.2081337	0.025442985	32	1164.519355	0.003330939
6236690	81	31	1967	-103.7823662	45.2341239	0.022656902	18	747.1751557	0.002298866
6236693	82	4	1967	-89.3824309	35.5377957	0.041335449	47	1632.092264	0.005224344
6236698	82	6	1967	-89.0787139	35.3612207	0.05446849	56	1847.923908	0.006822908
6236700	82	7	1967	-88.0066271	36.3584295	0.035169147	45	1441.428066	0.004661133
6236703	82	9	1967	-88.5485594	35.4115013	0.035936205	41	1475.890744	0.004489459
6236707	82	14	1967	-87.6933829	36.5004837	0.047168872	53	1697.509172	0.006736764
6236710	82	15	1967	-87.6852374	35.1607149	0.049708374	57	1647.547004	0.007431127
6236713	82	16	1967	-87.3276749	35.8791357	0.05358899	62	1849.773608	0.008216283
6236717	82	17	1967	-87.1440788	35.3492078	0.047498894	55	1596.436238	0.006716728
6236720	82	24	1967	-86.2170779	35.3582118	0.052882674	59	1720.625045	0.00719587
6236723	82	25	1967	-85.7051469	36.0984567	0.044182539	53	1647.948921	0.00616386
6236726	82	26	1967	-85.6700349	36.5041157	0.05604458	63	1877.595004	0.007644224
6236729	82	27	1967	-85.9158515	35.3801394	0.043688603	49	1734.593756	0.005292333
6236733	82	32	1967	-84.3613059	36.2936637	0.055632349	64	1786.821484	0.008575495
6236737	82	34	1967	-84.3482669	36.0487507	0.054010349	67	1804.239684	0.008294241
6236741	82	35	1967	-84.3834619	35.1735497	0.043235541	46	1173.373007	0.007089939
6236745	82	37	1967	-83.7710499	36.1388087	0.051057091	56	1745.185477	0.006952819
6236869	83	5	1967	-97.9466526	27.5323198	0.088460332	50	1961.545608	0.008789385
6236873	83	7	1967	-98.8220264	27.0738442	0.093600573	45	1664.825477	0.010167079
6236877	83	14	1967	-97.2207629	28.7836187	0.030089002	31	1405.705644	0.003998439
6236881	83	16	1967	-98.3175579	28.2807187	0.089090023	43	1716.227448	0.009209931
6236883	83	25	1967	-96.550258	29.513077	0.039886328	39	1591.231862	0.004943682
6236887	83	27	1967	-97.7494969	29.8219637	0.05110041	38	1721.5464	0.005614798
6236891	83	35	1967	-95.8024839	30.7866757	0.037331857	42	1526.421675	0.005304886
6236895	83	36	1967	-96.7199849	30.7620487	0.030387863	36	1393.207789	0.004341342
6236903	83	57	1967	-94.1555047	32.4388568	0.05206652	47	1611.207616	0.006871487
6236905	83	66	1967	-99.2729117	32.2195028	0.043059527	33	1426.915521	0.005420146
6236908	83	68	1967	-94.7471681	33.3601066	0.048869432	51	1661.220815	0.006486759
6236912	87	1	1967	-72.6842749	42.8198757	0.035956791	59	1622.537028	0.006609897
6236916	87	2	1967	-73.2805777	42.8089741	0.033157159	53	1400.20695	0.005151292
6236920	87	3	1967	-72.9535464	43.0451274	0.032108188	50	1251.796905	0.005336645
6236924	87	10	1967	-73.0950522	43.6132776	0.036785807	57	1690.892651	0.005276316
6236928	87	12	1967	-71.8536769	44.6832207	0.033673882	50	1414.768042	0.00490291
6236932	87	20	1967	-72.7821029	44.7283887	0.041802097	48	1403.024652	0.00549437
6236938	87	23	1967	-73.2760665	44.7616696	0.031363904	53	1522.207522	0.005026866
6236942	88	3	1967	-79.4594489	38.2891547	0.053626114	62	1638.520717	0.007916857
6236946	88	43	1967	-77.1454409	36.6057147	0.039705096	46	1479.935929	0.005238116
6237096	56	1	1967	-68.26669	47.57378	0.055565737	46	937.9807842	0.020877264
6237101	56	10	1967	-66.21001	47.91594	0.04590785	64	1781.678325	0.007462004
6237105	56	26	1967	-65.79167	46.95989	0.056949441	70	1724.964424	0.008136075
6237109	56	31	1967	-64.29218	45.86972	0.03893831	52	1398.070221	0.005611325
6237112	56	34	1967	-67.34539	45.57721	0.054222382	68	1530.991846	0.008921124
6237115	56	37	1967	-66.10086	45.86385	0.044034133	62	1526.686066	0.007522711
6237119	58	8	1967	-71.1982777	43.2499219	0.041136131	63	1806.560952	0.007114186
6237122	58	9	1967	-71.6070436	43.3742607	0.030634707	49	1343.141314	0.005154677
6237125	58	18	1967	-71.7063079	44.1798777	0.052678584	73	1545.97372	0.009503125
6237129	59	8	1967	-74.8571779	39.9721857	0.028642681	43	1495.145809	0.003702427
6237132	59	9	1967	-74.9255249	39.4166137	0.047080737	50	1604.340847	0.00609005
6237135	59	19	1967	-74.7967659	41.1181687	0.025881999	44	1433.745631	0.003657565
6237139	61	1	1967	-72.634109	40.797702	0.044362773	44	1411.797788	0.005725825
6237142	61	3	1967	-73.392019	40.900112	0.031571014	44	1611.608327	0.004013593
6237146	61	6	1967	-73.639499	41.217092	0.036530484	53	1444.476057	0.005413012
6237153	61	11	1967	-74.4140959	41.3812217	0.031331049	50	1446.39944	0.004625582
6237156	61	13	1967	-74.5802369	41.5334407	0.039208952	57	1828.260178	0.005204735
6237159	61	21	1967	-74.1783949	42.3989107	0.034417584	58	1626.626784	0.005218343
6237163	61	26	1967	-74.1951349	42.7318997	0.035098215	52	1652.871282	0.004499898
6237166	61	27	1967	-74.4004979	42.4848037	0.043155317	67	1787.823154	0.007576582
6237169	61	30	1967	-75.9366669	42.3472227	0.032787733	52	1418.303711	0.005325546
6237172	61	31	1967	-75.5570359	42.3180237	0.039797998	65	1781.226143	0.00625913
6237175	61	36	1967	-75.6038909	42.4021987	0.04462482	67	1993.849902	0.006892391
6237177	61	49	1967	-77.225107	42.665781	0.037852201	55	1687.976292	0.005160282
6237182	61	58	1967	-78.103787	42.624922	0.033321259	52	1805.220312	0.004044072
6237185	61	59	1967	-78.9408579	42.0548007	0.04933911	73	1959.065773	0.008383298
6237189	61	169	1967	-76.680291	43.265073	0.036653614	58	1767.353658	0.005320375
6237191	61	78	1967	-75.0230329	43.4738997	0.043921594	63	1654.750383	0.006609994
6237194	61	85	1967	-74.3975289	43.5654587	0.038196997	57	1385.276758	0.007304618
6237198	61	94	1967	-75.4279329	44.3163047	0.029911693	45	1287.575632	0.004072814
6237201	63	1	1967	-78.3795679	33.9814607	0.065470115	51	1634.567042	0.008250539
6237206	63	3	1967	-77.8775469	34.1327657	0.081078038	57	1793.240593	0.009893242
6237209	63	4	1967	-78.0716243	34.5342189	0.072593862	59	1698.712235	0.009981863
6237213	63	11	1967	-77.7112775	35.2819414	0.033953565	38	1332.351087	0.004595037
6237216	63	12	1967	-78.3220803	35.6755372	0.040913216	47	1576.960218	0.005444363
6237219	63	25	1967	-78.4863356	36.0593305	0.044638256	54	1751.251876	0.006412681
6237222	64	3	1967	-98.4812089	46.7477197	0.040742016	42	1567.308561	0.004067129
6237225	64	5	1967	-99.4688039	46.8060287	0.062443533	55	1783.951542	0.006667711
6237229	64	23	1967	-101.6472319	48.4447167	0.069142419	56	1760.620958	0.007323525
6237232	65	2	1967	-60.52314	47.01885	0.043394909	54	1456.546125	0.006847243
6237237	65	5	1967	-60.73225	45.58382	0.033403547	46	1385.890449	0.006271978
6237241	46	16	1967	-76.8137896	39.5515705	0.040794656	54	1578.256937	0.005469487
6237245	46	17	1967	-76.7644397	39.7002158	0.043742088	56	1645.018827	0.006309154
6237249	46	21	1967	-76.5302869	39.0573627	0.038239621	51	1581.297401	0.005883606
6237275	80	18	1967	-83.2805093	34.6616003	0.044545813	45	1451.41692	0.005676258
6237278	81	6	1967	-99.3437499	43.9043437	0.039025178	36	1361.937349	0.003913554
6237282	81	9	1967	-102.5111319	43.6550387	0.033481849	35	1545.561879	0.003636261
6237285	81	10	1967	-96.9486732	44.2320836	0.034939349	51	1604.701883	0.004099864
6237289	81	19	1967	-97.7103493	45.7331549	0.03617181	46	1697.142095	0.003821942
6237292	81	20	1967	-98.8284656	45.9390434	0.05928213	47	1695.321005	0.005867216
6237296	81	29	1967	-103.640174	43.8204584	0.021986706	33	1112.815871	0.003252282
6237300	81	30	1967	-101.3067249	44.2125557	0.051271588	40	1647.501877	0.003966291
6237302	81	32	1967	-101.9591186	43.7410071	0.033504239	31	1400.208282	0.002813182
6237306	82	3	1967	-89.3754293	35.0517759	0.037050862	43	1657.696478	0.004367345
6237310	82	5	1967	-89.334166	35.6893173	0.034296852	42	1634.054509	0.003992499
6237318	82	13	1967	-86.9969029	36.1745577	0.049431307	58	1791.604139	0.007016336
6237322	82	18	1967	-87.6791989	35.4941757	0.065399599	70	1934.530341	0.010178278
6237324	82	21	1967	-86.6657259	35.3350377	0.039656687	45	1471.079225	0.005055553
6237328	82	23	1967	-86.1676666	35.7357596	0.051333714	60	1896.580686	0.006899177
6237332	82	28	1967	-85.2816399	35.1334457	0.039255056	52	1563.657661	0.00561116
6237341	82	33	1967	-84.1514213	35.9135129	0.046083993	53	1678.273224	0.006004348
6237346	82	36	1967	-84.783248	35.171428	0.050347883	58	1710.259475	0.006977799
6237349	82	38	1967	-83.5013209	36.1754317	0.044815861	54	1796.055375	0.00592737
6237354	83	2	1967	-98.135998	26.8901748	0.079585307	37	1538.171998	0.008709302
6237358	83	4	1967	-99.2716219	26.9073677	0.073373749	42	1568.11277	0.009062811
6237362	83	20	1967	-94.3415601	29.6706502	0.058078495	42	1747.092925	0.010545766
6237365	83	22	1967	-95.2442265	29.1267731	0.029691037	34	1529.93282	0.004115584
6237370	83	29	1967	-97.9801349	29.2751357	0.062292932	44	1842.887438	0.007912522
6237373	83	32	1967	-94.0899029	30.7962929	0.049159534	51	1770.77267	0.006208165
6237377	83	37	1967	-96.1971439	30.5287897	0.028066919	34	1368.171286	0.004250366
6237381	83	39	1967	-97.6537479	30.6618397	0.043132783	31	1335.470117	0.004258137
6237386	83	74	1967	-97.460791	33.0581596	0.02555678	30	1392.489853	0.003296557
6237389	83	81	1967	-101.2407759	29.9214837	0.060475127	30	1207.282595	0.006172949
6237393	83	86	1967	-101.9691922	31.2059844	0.045404789	27	1184.413024	0.00519855
6237397	83	88	1967	-103.4483656	30.2861238	0.047534005	29	1161.609815	0.005483481
6237401	87	6	1967	-72.7210716	43.7503293	0.038326713	51	1358.595789	0.005213801
6237405	88	2	1967	-77.5849759	39.2649107	0.041129825	54	1692.729778	0.005578074
6237409	88	9	1967	-77.2851029	38.9966467	0.039989028	50	1708.066939	0.005079012
6237413	88	19	1967	-79.2389683	37.6105326	0.037885858	46	1482.700811	0.005149392
6237418	88	29	1967	-76.341428	37.6595013	0.049898795	63	1897.453905	0.008058183
6237422	88	32	1967	-75.7320849	37.5482647	0.073023509	70	2278.870563	0.009904851
6237426	88	44	1967	-77.2865338	36.5960851	0.081322105	73	2015.600754	0.010933404
6237526	56	5	1967	-67.53488	47.07088	0.032048296	48	1222.015184	0.005406612
6237527	56	17	1967	-67.18408	46.91322	0.039386322	51	1357.377127	0.005745708
6237529	56	25	1967	-65.85627	46.5308	0.053458462	55	1483.974117	0.007004642
6237531	56	29	1967	-64.96499	46.73222	0.0562018	70	1695.146691	0.00897919
6237533	56	30	1967	-64.95069	46.88718	0.056122183	74	1925.566346	0.009324519
6237535	58	2	1967	-71.0690899	42.9514077	0.036835032	61	1653.657828	0.006678687
6237537	58	5	1967	-71.686612	43.1841551	0.043839755	62	1417.407271	0.007334429
6237539	58	12	1967	-71.2929175	43.9913408	0.037646875	53	1319.582713	0.006131182
6237541	58	19	1967	-71.3190129	44.6075764	0.045933621	66	1664.098488	0.008050877
6237543	59	18	1967	-74.2556528	41.0726673	0.024528271	43	1439.089464	0.003336847
6237545	61	2	1967	-72.7986209	40.8644157	0.035885933	46	1619.822247	0.004977821
6237547	61	5	1967	-73.2277839	40.7992357	0.036624161	43	1396.651466	0.005047565
6237552	61	12	1967	-74.0071189	41.8019497	0.039283555	55	1538.299068	0.00599124
6237555	61	15	1967	-74.5049339	41.4526297	0.040734554	57	1891.157056	0.005567218
6237557	61	17	1967	-73.3039629	42.7275747	0.042169859	66	1564.97293	0.007577536
6237560	61	20	1967	-73.8449109	42.9277137	0.042497883	61	1778.423307	0.005742836
6237562	61	25	1967	-74.4021599	42.6548767	0.035692781	51	1472.732247	0.004545744
6237565	61	32	1967	-75.7308889	42.5200097	0.046877012	63	1546.875282	0.007789623
6237568	61	35	1967	-75.468728	42.903801	0.035483413	58	1881.52185	0.00460474
6237571	61	44	1967	-76.036148	42.036872	0.034516346	51	1386.446465	0.00572638
6237573	61	54	1967	-78.6967019	42.9562967	0.042227737	62	1833.168374	0.005652742
6237576	61	56	1967	-78.8989789	42.2769437	0.036663636	53	1519.42916	0.005265504
6237579	61	63	1967	-79.033047	42.501182	0.051628634	68	1987.007359	0.007378693
6237582	61	64	1967	-78.8506549	43.0697617	0.025828355	43	1473.02325	0.003160999
6237584	61	89	1967	-73.312309	43.199431	0.045455037	65	2064.449383	0.0059097
6237587	61	106	1967	-73.7671769	44.1501027	0.038203812	51	1302.460429	0.006301362
6237590	61	109	1967	-73.4887779	44.4433387	0.031407069	46	1112.935422	0.005287282
6237592	61	110	1967	-77.4085679	42.6074657	0.037365044	57	1675.013929	0.005172221
6237595	63	10	1967	-77.4434709	35.9691437	0.042169131	48	1674.321641	0.005133675
6237598	63	15	1967	-79.7044966	35.917637	0.052867121	58	1693.271296	0.007563382
6237601	64	2	1967	-97.0100549	46.4854717	0.04029905	46	1529.884806	0.003932403
6237603	64	7	1967	-97.6029243	47.845638	0.04442484	46	1428.226827	0.004216934
6237606	64	12	1967	-99.0545676	47.0807973	0.066544666	65	2111.571182	0.006790801
6237608	58	1	1967	-71.8661202	42.9015085	0.0416458	55	1632.696195	0.005560163
6237610	64	27	1967	-96.7567323	46.4129929	0.023999263	40	1298.689661	0.003059384
6237612	58	6	1967	-71.2880123	43.1980043	0.033071207	53	1552.556343	0.005848373
6237614	64	30	1967	-103.431806	46.198459	0.074091942	47	1678.719841	0.006712685
6237616	58	7	1967	-71.6191959	43.2494327	0.036324195	61	1497.83696	0.006424426
6237618	65	1	1967	-61.33859	46.12688	0.043327465	57	1155.365387	0.007380855
6237620	58	11	1967	-71.8805982	43.4568165	0.025891602	47	994.0757324	0.004901041
6237623	58	15	1967	-72.1318885	43.5045711	0.022070829	37	1091.827791	0.003699155
6237626	65	3	1967	-60.9298	46.7198	0.036472923	53	1338.200994	0.006500534
6237627	58	16	1967	-71.35	44.1166667	0.047068055	63	1442.341018	0.008753705
6237630	46	15	1967	-76.9692792	39.6359624	0.040685726	54	1743.233237	0.005407042
6237631	58	17	1967	-71.3885019	44.3571867	0.052706493	74	1777.245723	0.009813242
6237634	46	20	1967	-76.3159492	39.4890766	0.068030077	70	1789.445044	0.009233705
6237635	58	20	1967	-71.5868762	44.6832807	0.052533753	72	1955.609411	0.007394679
6237638	46	22	1967	-76.8497577	39.0164522	0.038823605	57	1534.701787	0.00601416
6237639	58	21	1967	-71.3006396	44.8672811	0.071628286	76	1715.089359	0.02377165
6237642	46	25	1967	-76.5513069	38.4066787	0.054985304	63	2057.100215	0.007996172
6237643	58	22	1967	-71.3746691	44.9972951	0.051672405	59	1599.637324	0.007198478
6237646	46	30	1967	-77.0780349	38.6021387	0.054445835	65	1905.213372	0.007763231
6237647	59	1	1967	-75.1462189	39.8314157	0.031524105	44	1489.127411	0.004170211
6237651	59	6	1967	-74.9720939	39.7769177	0.0435026	49	1489.734849	0.005458242
6237655	46	35	1967	-75.7640082	39.276509	0.045152075	58	1693.665857	0.006523881
6237656	59	7	1967	-74.8443379	39.6956577	0.029363836	41	1230.332221	0.004439618
6237660	46	39	1967	-75.9331139	38.8211117	0.04708594	57	1708.78883	0.006657312
6237663	61	8	1967	-73.924448	41.962831	0.041315178	60	1723.383886	0.00687107
6237667	61	9	1967	-73.989448	41.749942	0.03581829	47	1553.222046	0.00513177
6237671	61	18	1967	-73.9939669	42.3521387	0.026450006	46	1264.589104	0.004629839
6237675	61	19	1967	-73.676619	42.320431	0.037855805	56	1647.308573	0.005137311
6237679	61	38	1967	-76.0044449	42.3591667	0.036689042	56	1558.766787	0.005432531
6237684	61	39	1967	-76.1634009	42.2073307	0.03861025	59	1635.217014	0.00546912
6237687	61	41	1967	-76.2599639	42.5202627	0.039850185	57	1756.356098	0.005297309
6237692	61	43	1967	-76.6333469	42.5515907	0.033841075	51	1585.780011	0.004864931
6237696	61	46	1967	-77.8406359	42.5032347	0.039280351	62	1644.115231	0.006450153
6237703	61	51	1967	-77.5572209	42.9708677	0.031150835	39	1298.249703	0.003141856
6237707	61	53	1967	-78.8216099	42.6805707	0.032741135	49	1573.159753	0.004453196
6237709	61	61	1967	-79.259007	42.501632	0.046353317	59	1612.740233	0.006216738
6237713	61	66	1967	-78.1154029	43.1496467	0.038558296	54	1941.599289	0.004631828
6237716	61	70	1967	-76.0264589	43.1693497	0.040945633	59	1791.912911	0.00521457
6237720	61	71	1967	-76.0454869	44.0000587	0.027168284	42	1433.347063	0.003417626
6237724	61	76	1967	-75.5571819	43.6286487	0.035567593	48	1329.804679	0.006025317
6237729	61	77	1967	-75.1690839	43.7262817	0.044241967	63	1701.334011	0.006948357
6237732	61	93	1967	-73.7953919	43.5327757	0.033419276	54	1261.411955	0.006145828
6237737	63	9	1967	-76.9799209	35.7365247	0.042196325	49	1477.667378	0.006140076
6237740	46	18	1967	-76.8160804	39.3456735	0.040138609	53	1681.874203	0.005633895
6237744	46	19	1967	-76.4856444	39.5386386	0.043175632	57	1663.59454	0.005759277
6237747	46	29	1967	-76.8406989	38.5217447	0.046052771	54	1566.12721	0.006496861
6237750	46	40	1967	-76.075195	38.7863193	0.044330129	48	1562.69802	0.005533885
6237751	46	41	1967	-76.1997997	38.4607494	0.05179119	56	1802.291744	0.006699618
6237754	46	46	1967	-75.7898657	38.4485307	0.044333725	50	1520.025948	0.006012357
6237757	46	50	1967	-75.3924539	38.2159987	0.067650043	69	2013.386711	0.009683995
6237758	47	8	1967	-71.4311953	42.4344551	0.031360029	51	1582.610772	0.005220259
6237761	47	9	1967	-71.5305739	42.5199697	0.037040598	54	1629.602044	0.005648142
6237764	47	19	1967	-72.8474923	42.3761743	0.034583644	57	1367.722932	0.006270218
6237767	49	1	1967	-89.3135462	46.8708967	0.038519193	49	1352.935094	0.005556191
6237768	49	4	1967	-88.3459559	47.1191407	0.037213857	55	1460.432222	0.00611841
6237771	49	16	1967	-86.7090609	45.9415397	0.030175577	50	1479.655959	0.005515958
6237774	49	17	1967	-86.1283614	44.4308	0.036192458	55	1522.508145	0.005546034
6237777	49	23	1967	-85.7410523	46.6724597	0.03180689	42	1308.771938	0.003745667
6237778	49	26	1967	-85.1711649	45.0543537	0.039770411	60	1542.849675	0.005337413
6237781	49	31	1967	-85.4259649	43.7075427	0.047236392	60	1712.167336	0.006250321
6237784	49	49	1967	-84.1150501	43.3437119	0.038856455	52	1650.950535	0.004161461
6237785	49	58	1967	-84.4196082	41.8177964	0.041043059	59	1802.174815	0.005539646
6237788	49	59	1967	-83.4954069	45.1623677	0.041357956	57	1726.594723	0.005723173
6237791	50	18	1967	-94.2849051	45.7028381	0.050755523	63	2108.739185	0.005439643
6237794	50	28	1967	-95.4769368	46.7456606	0.042326827	62	1936.467437	0.005357725
6237795	50	39	1967	-94.3015209	47.3145457	0.026305095	46	1457.635489	0.004706797
6237797	50	40	1967	-94.8854299	47.5989877	0.034630478	54	1677.341994	0.005542377
6237802	51	8	1967	-90.5715029	32.1085617	0.055237543	51	1527.81378	0.007328709
6237804	51	9	1967	-90.5987079	31.5016917	0.051319667	45	1613.700302	0.006815458
6237809	51	28	1967	-88.5298989	31.6890917	0.027795247	25	1288.018932	0.0027256
6237812	51	29	1967	-88.6519849	30.3885217	0.037346674	29	1254.159077	0.003810547
6237814	52	28	1967	-92.5567869	39.4294496	0.044338452	52	1666.53506	0.0055013
6238437	63	26	1967	-79.8547069	36.3779757	0.026055425	39	1289.097024	0.003887973
6238439	64	26	1967	-102.4614329	48.2692787	0.063191029	52	1709.747823	0.006648803
6238443	64	31	1967	-101.9319632	47.4076426	0.049134174	49	1610.071436	0.00556344
6238447	46	14	1967	-77.0236228	39.6423121	0.046615726	53	1762.172529	0.005281089
6238448	46	26	1967	-76.5747889	38.5016307	0.046283917	59	1844.833155	0.006566176
6238451	46	23	1967	-76.8054449	38.9314667	0.047350873	59	1601.417552	0.006789089
6238452	46	27	1967	-76.5442846	38.168955	0.063370889	59	1668.260385	0.008433991
6238455	46	28	1967	-76.972877	38.5584741	0.054493673	65	1846.000578	0.00801143
6238456	46	34	1967	-75.9042529	39.5231571	0.053572129	72	2126.452281	0.007690164
6238457	46	31	1967	-77.0558732	38.5960742	0.053404078	62	1714.044876	0.008086487
6238460	46	36	1967	-76.1481269	39.2640947	0.045841783	55	1878.191618	0.005260636
6238461	46	33	1967	-75.94228	39.52083	0.057249609	62	1813.861731	0.007015718
6238462	46	37	1967	-76.192383	39.10312	0.058673405	62	2292.176045	0.006757016
6238465	46	38	1967	-75.8845056	38.783977	0.05333471	65	2057.268794	0.006759058
6238466	46	48	1967	-75.2663372	38.2256736	0.063597498	73	2247.300165	0.009455744
6238469	46	42	1967	-76.2432656	38.3676908	0.102170099	72	2369.230932	0.015988223
6238470	46	49	1967	-75.1522729	38.2475487	0.065667277	66	2192.992143	0.008769151
6238473	46	45	1967	-75.5667709	38.3007427	0.053153331	58	1806.065248	0.007845408
6238474	47	1	1967	-70.1656255	41.750876	0.026660738	37	1416.748016	0.003631888
6238475	46	47	1967	-75.5797027	38.1651924	0.065758056	68	2122.829501	0.009199715
6238478	47	7	1967	-70.8188944	42.8153398	0.049935877	70	1908.585561	0.008122142
6238483	47	5	1967	-71.0799209	41.9386087	0.029728205	48	1435.647077	0.005187814
6238484	49	9	1967	-87.1371679	46.3041157	0.02761363	45	1147.362289	0.005003175
6238487	49	12	1967	-87.4492339	45.6475737	0.024066871	43	1079.582179	0.00437178
6238488	49	39	1967	-85.7505398	41.7653686	0.037051425	52	1568.533414	0.004523352
6238491	49	57	1967	-83.9934149	41.9189847	0.03589677	51	1550.051693	0.004204266
6238492	49	35	1967	-85.4136135	42.2526585	0.043248398	63	1948.770584	0.005771632
6238495	49	60	1967	-83.7543039	44.9223577	0.031023176	45	1250.982289	0.004025324
6238496	49	53	1967	-84.1820229	42.7647917	0.035770875	51	1671.678307	0.004673957
6238497	49	63	1967	-83.4224989	43.3504847	0.026595018	37	1399.562962	0.002482553
6238500	50	2	1967	-92.0912443	43.8977022	0.036452117	47	1607.336687	0.003984501
6238501	49	66	1967	-83.6658459	42.4612927	0.024296085	45	1514.673509	0.003298577
6238504	50	25	1967	-94.5135819	46.8020456	0.031762111	50	1397.848003	0.005618493
6238505	49	71	1967	-82.8983389	43.6676047	0.03119737	51	1397.416105	0.004400745
6238508	50	35	1967	-92.9862729	47.0684835	0.033510596	49	1218.831162	0.005014628
6238512	50	43	1967	-96.6336288	47.5136293	0.040816119	58	1876.586874	0.004765741
6238513	50	1	1967	-91.6904455	43.8139858	0.040940495	57	1880.251513	0.004780873
6238515	51	4	1967	-90.4443729	34.8108067	0.047973756	54	1740.26563	0.006528872
6238516	50	7	1967	-92.2705246	44.2229204	0.02846394	39	1439.812072	0.002941346
6238519	51	24	1967	-88.4929289	32.8336097	0.03497946	33	1280.749505	0.004086851
6238520	50	10	1967	-94.0314709	44.6299537	0.043363865	46	1720.504157	0.003785677
6238523	52	7	1967	-89.526555	37.3066269	0.039457311	51	1750.748622	0.004837728
6238524	50	16	1967	-93.4714512	45.1025755	0.041258979	61	2025.46172	0.004449026
6238527	52	10	1967	-91.5529269	37.3759607	0.053763649	61	1779.106777	0.007481907
6238528	50	17	1967	-94.196858	45.1642488	0.053007309	63	2164.886564	0.005130213
6238531	52	17	1967	-90.9840159	38.5176867	0.050003308	61	1799.714711	0.006440296
6238532	50	22	1967	-92.6394206	46.704186	0.050994292	68	1782.466785	0.009030855
6238535	52	19	1967	-91.6100939	38.9160367	0.041769005	50	1709.006873	0.004919502
6238536	50	32	1967	-90.703063	47.7313654	0.045965515	54	1152.268438	0.008843537
6238540	51	11	1967	-89.8251049	34.9619827	0.03102162	37	1413.993545	0.003684146
6238544	51	16	1967	-89.1019294	32.5602847	0.045785922	50	1786.390289	0.005509813
6238547	54	6	1967	-98.6673129	40.6184587	0.019111353	28	1087.437813	0.002254296
6238548	51	20	1967	-89.7137542	30.7939126	0.048481553	42	1626.366388	0.005359546
6238551	54	8	1967	-99.5023032	40.9376453	0.022692045	29	1032.290613	0.00262278
6238552	51	23	1967	-88.6241136	33.1507326	0.030636479	36	1564.955595	0.003144731
6238555	52	5	1967	-93.9101019	36.6608617	0.067563067	61	2035.594076	0.007426611
6238556	54	16	1967	-98.6840139	41.9187247	0.034135389	40	1405.505282	0.005194411
6238559	54	23	1967	-97.9539527	42.6988061	0.031440877	44	1500.404974	0.004008919
6238560	52	14	1967	-93.513291	37.4542087	0.036519332	47	1672.570584	0.004569254
6238563	52	32	1967	-94.6654829	39.6539807	0.043002853	56	1929.512391	0.004889958
6238564	54	28	1967	-99.9988861	42.5928366	0.037238295	46	1591.247235	0.003855758
6238567	52	33	1967	-91.7164609	40.4712817	0.045752755	54	1720.212626	0.005148997
6238571	52	35	1967	-93.5563439	40.0903817	0.030968061	44	1531.041328	0.003964062
6238575	54	3	1967	-96.4070669	40.0734217	0.04083074	53	1630.346211	0.004848632
6238579	54	4	1967	-97.5577459	40.2199177	0.019608082	29	1020.271563	0.002153248
6238582	54	5	1967	-97.1583399	40.8872417	0.029579326	33	1359.465239	0.0026989
6238585	54	12	1967	-96.1391528	41.1764063	0.026704458	39	1423.103564	0.003140986
6238588	54	13	1967	-96.08125	41.34351	0.0278228	36	1312.339336	0.002889756
6238591	54	14	1967	-97.3498079	41.1630727	0.020968639	30	1217.816454	0.002190568
6238595	54	24	1967	-97.1347279	42.1849007	0.027017984	35	1420.313557	0.00255832
6238598	54	25	1967	-98.5988124	42.7695353	0.035446439	41	1506.553446	0.004806141
6238601	54	26	1967	-98.6769859	42.6534207	0.043202886	53	1917.467837	0.00595949
6238997	46	43	1967	-76.2101023	38.5258637	0.079376959	70	2212.675647	0.015204706
6239000	46	44	1967	-75.7964256	38.5203297	0.051105476	60	1852.398932	0.007077098
6239003	47	3	1967	-70.7712211	41.7147936	0.024384463	35	1356.166641	0.003438776
6239006	47	6	1967	-70.8662472	42.0823387	0.024968457	43	1376.687887	0.004122386
6239008	47	13	1967	-71.6344439	42.6459177	0.035062706	55	1731.057309	0.005619465
6239011	47	14	1967	-72.3589728	42.2697823	0.037910143	62	1611.271859	0.006496497
6239015	47	21	1967	-73.1828649	42.4161992	0.028941352	49	1296.095069	0.005314056
6239019	49	14	1967	-86.3861779	46.3573017	0.060629177	71	1796.302678	0.00929301
6239023	49	42	1967	-84.5908579	45.6460027	0.045701052	58	1642.175303	0.006081434
6239027	49	45	1967	-84.5561649	44.0897553	0.046441085	64	1811.697632	0.006520701
6239032	50	3	1967	-93.4993444	43.8179682	0.023037189	39	1387.556388	0.002598503
6239035	50	4	1967	-94.287449	43.7677899	0.023280475	37	1221.665323	0.002716401
6239042	50	23	1967	-93.8074399	46.2421178	0.035575468	52	1687.865962	0.0043509
6239045	50	24	1967	-93.6014381	46.3671876	0.038764895	49	1899.190662	0.004048208
6239051	50	26	1967	-94.365017	46.754647	0.038446387	57	1690.258823	0.005818553
6239056	50	34	1967	-91.8050812	47.0678994	0.027290375	47	1182.274231	0.004853731
6239060	50	36	1967	-92.9913092	47.5952985	0.030441017	53	1431.357921	0.004952044
6239064	51	2	1967	-91.3943546	31.3905325	0.050425527	51	1725.807075	0.006850695
6239068	51	10	1967	-91.0571174	31.7099007	0.040353019	40	1588.829508	0.004393268
6239072	51	12	1967	-89.8113619	34.8019937	0.039555919	47	1621.595143	0.004982523
6239075	52	1	1967	-89.2477946	36.8252566	0.050749246	47	1748.959827	0.005429826
6239086	52	8	1967	-90.3074923	37.2598585	0.043841688	51	1540.07845	0.005583456
6239088	52	13	1967	-92.9258039	37.5143127	0.040815455	48	1676.633378	0.004745984
6239091	52	24	1967	-94.1129899	38.9606177	0.028359131	42	1502.206771	0.004079564
6239094	52	26	1967	-91.6029119	39.7354717	0.034075359	47	1591.392531	0.004612601
6239098	52	36	1967	-94.8528289	40.0768697	0.040760182	58	1984.975321	0.004861105
6239104	54	2	1967	-96.0668798	40.4650912	0.029228398	43	1469.591996	0.00352392
6239108	54	10	1967	-100.2510124	40.1757846	0.020677909	28	1150.103046	0.002487029
6239116	54	20	1967	-101.2702409	41.1634457	0.029844409	35	1349.864036	0.00287333
6239121	54	22	1967	-96.7354923	42.1915702	0.038518644	48	1565.078701	0.004346166
6239125	54	29	1967	-101.7208618	42.2796649	0.03639309	31	1284.791308	0.00309954
6239129	54	30	1967	-103.7829219	42.2503717	0.047482757	27	1142.495809	0.003777626
6253184	83	13	1967	-96.5045939	28.5227307	0.090314042	44	1831.870121	0.014547145
6165530	52	32	1968	-94.6654829	39.6539807	0.040300532	48	1655.583613	0.004344994
6165531	52	35	1968	-93.5563439	40.0903817	0.03130702	44	1439.423954	0.004175255
6165532	52	36	1968	-94.8528289	40.0768697	0.048971119	60	1791.226434	0.005859289
6165533	53	5	1968	-111.622297	48.8711551	0.036907382	27	1096.004277	0.003423275
6165534	53	2	1968	-114.4619289	48.1080187	0.045026555	51	1748.428512	0.005101866
6165535	53	3	1968	-113.4130179	48.8084087	0.054250198	29	1178.977497	0.004342642
6165536	52	37	1968	-95.2344749	40.4658297	0.045969014	63	1906.330297	0.005986899
6165537	53	15	1968	-113.9489899	47.1824757	0.041617507	37	1123.797255	0.00539542
6165538	53	8	1968	-108.7144099	48.3824357	0.028156267	26	1167.849543	0.003347564
6165539	53	22	1968	-106.9035649	47.6042107	0.035752334	46	1741.308478	0.005061958
6165540	53	10	1968	-106.5334326	48.2045751	0.047737577	39	1577.21301	0.005339426
6165541	53	12	1968	-104.8419949	48.8382207	0.029885314	29	1183.623476	0.003360815
6165543	53	25	1968	-114.4626919	46.9175377	0.047326251	44	1279.749102	0.005621927
6165544	53	31	1968	-108.3468089	46.9022197	0.032661182	34	1407.427965	0.00306746
6165545	53	24	1968	-104.1527019	47.4695697	0.013177356	19	869.8839026	0.001703613
6165546	53	27	1968	-112.4949499	46.6205137	0.034642489	40	1253.899992	0.003660515
6165547	53	32	1968	-107.0640799	46.5835337	0.017801936	20	1051.626464	0.001815161
6165548	54	6	1968	-98.6673129	40.6184587	0.020693004	30	1205.193633	0.002149822
6165549	53	37	1968	-112.5643159	45.3055747	0.057704498	53	1946.135407	0.005015956
6165550	54	3	1968	-96.4070669	40.0734217	0.03689222	50	1676.575307	0.004144028
6165551	54	8	1968	-99.5023032	40.9376453	0.018590685	25	1072.167821	0.00210841
6165552	53	41	1968	-108.7802397	45.5642095	0.023480815	38	1458.023655	0.002992619
6165553	54	4	1968	-97.5577459	40.2199177	0.023586418	33	1390.783955	0.002569316
6165554	54	16	1968	-98.6840139	41.9187247	0.040157998	47	1746.743706	0.003931464
6165555	54	2	1968	-96.0668798	40.4650912	0.025936977	39	1428.305022	0.003087953
6165556	54	5	1968	-97.1583399	40.8872417	0.027573851	37	1322.084296	0.003071285
6165557	54	7	1968	-98.8760679	40.6406757	0.036186506	42	1613.574362	0.00361917
6165558	54	21	1968	-102.9730078	41.3523266	0.033498287	34	1265.162632	0.003095355
6165559	54	12	1968	-96.1391528	41.1764063	0.026976879	40	1376.084769	0.003141441
6165560	54	15	1968	-97.1945039	41.4820177	0.036574623	41	1533.488286	0.003362478
6165561	55	10	1968	-116.5858881	40.0802831	0.030785938	30	1116.728776	0.003679729
6165562	54	13	1968	-96.08125	41.34351	0.029829875	34	1280.076367	0.002652674
6165563	54	20	1968	-101.2702409	41.1634457	0.035626943	43	1647.86116	0.003569751
6165564	55	17	1968	-115.2707624	39.3621311	0.027542493	19	653.7197891	0.003014147
6165565	54	29	1968	-101.7208618	42.2796649	0.041454754	34	1462.333978	0.003273436
6165566	54	14	1968	-97.3498079	41.1630727	0.026800385	38	1354.176126	0.003068496
6165567	55	20	1968	-118.4721449	38.5501977	0.006925992	5	276.5974443	0.000546888
6165568	54	30	1968	-103.7829219	42.2503717	0.041680797	31	1186.42384	0.003720479
6165569	54	24	1968	-97.1347279	42.1849007	0.02252934	32	1194.542413	0.002520407
6165570	55	22	1968	-116.4033739	38.8779597	0.028298839	20	962.7363551	0.003513672
6165571	55	1	1968	-119.8303989	41.4882487	0.015796343	11	415.4046014	0.001862053
6165572	54	25	1968	-98.5988124	42.7695353	0.038640043	46	1484.857068	0.005552279
6165573	55	30	1968	-115.2569349	36.9884637	0.020356733	10	484.1939819	0.002045886
6165574	55	3	1968	-117.1034859	41.8823377	0.015344627	11	500.4518343	0.001754674
6165575	55	5	1968	-115.9007665	41.0704517	0.040729486	41	1476.258371	0.004552543
6165576	56	13	1968	-64.83911	46.99828	0.049106898	67	2002.20318	0.007839313
6165577	55	8	1968	-118.3329159	40.4792817	0.016356772	14	710.1192019	0.001782012
6165578	55	13	1968	-119.5489579	39.7695387	0.026718316	14	708.4218995	0.002510332
6165579	56	14	1968	-65.22097	47.80494	0.032850428	44	1321.372625	0.004870843
6165580	55	11	1968	-115.6324132	40.0935212	0.045083801	33	1068.766699	0.006569925
6165581	55	25	1968	-117.6339503	37.7555048	0.015101532	10	489.5776776	0.000978952
6165582	56	21	1968	-66.9302	46.40997	0.055910537	65	1623.294098	0.007672519
6165583	55	16	1968	-116.3870941	39.5518146	0.026608801	21	894.0953022	0.002796122
6165584	55	27	1968	-115.0336839	37.6075607	0.043688249	42	1574.397757	0.005335273
6165585	56	5	1968	-67.53488	47.07088	0.034217006	44	1343.290035	0.004652114
6165586	56	33	1968	-67.42583	45.33027	0.042705572	54	1344.253328	0.006426306
6165587	56	1	1968	-68.26669	47.57378	0.040618308	42	1009.520001	0.006250728
6165588	56	17	1968	-67.18408	46.91322	0.046113831	58	1560.118328	0.006381776
6165589	56	38	1968	-66.65618	45.08596	0.037296136	51	1242.789328	0.006909883
6165590	56	22	1968	-66.18177	46.01228	0.041461978	54	1318.990267	0.006017304
6165591	56	7	1968	-67.67612	47.75451	0.038216871	45	998.8270781	0.0062254
6165592	56	42	1968	-65.04924	45.76289	0.054830354	74	1885.5854	0.008268801
6165593	56	25	1968	-65.85627	46.5308	0.056434569	68	1604.527429	0.0080812
6165594	56	10	1968	-66.21001	47.91594	0.051067078	68	1889.788319	0.008388427
6165595	58	3	1968	-72.1685998	42.8007764	0.042981786	66	1932.231689	0.006559446
6165596	56	29	1968	-64.96499	46.73222	0.049018108	65	1593.729093	0.007705532
6165597	56	26	1968	-65.79167	46.95989	0.060097766	75	1854.973009	0.009362966
6165598	58	4	1968	-70.9134599	43.2321417	0.045114921	69	2045.346029	0.00766119
6165599	56	30	1968	-64.95069	46.88718	0.050629066	71	2115.078775	0.008057609
6165600	58	2	1968	-71.0690899	42.9514077	0.038572516	63	1657.061058	0.007791061
6165601	56	31	1968	-64.29218	45.86972	0.040950112	54	1617.065216	0.00621589
6165602	58	13	1968	-72.3814817	43.0263963	0.032344958	57	1524.340325	0.005463389
6165603	58	5	1968	-71.686612	43.1841551	0.046011626	67	1550.150655	0.007449571
6165604	56	34	1968	-67.34539	45.57721	0.045067205	63	1562.672495	0.008058712
6165605	58	14	1968	-72.2121162	43.0768236	0.033849466	56	1251.109656	0.006373148
6165606	58	12	1968	-71.2929175	43.9913408	0.046306514	54	1486.067418	0.007081351
6165607	56	37	1968	-66.10086	45.86385	0.037755207	60	1512.780704	0.005897843
6165608	59	2	1968	-75.3494715	39.3852634	0.056113297	64	2048.544121	0.007484021
6165609	58	19	1968	-71.3190129	44.6075764	0.038048493	64	1541.267543	0.0063811
6165610	60	4	1968	-105.7975849	36.0797837	0.063939886	62	1771.867507	0.012366078
6165611	59	5	1968	-74.2280982	39.9994195	0.040222053	41	1530.97947	0.005428331
6165612	58	8	1968	-71.1982777	43.2499219	0.03791793	62	1468.785787	0.006773738
6165613	60	6	1968	-103.5750419	36.7278337	0.056136495	31	1392.824392	0.005083626
6165614	59	15	1968	-74.5975039	40.1964127	0.025683033	39	1194.600343	0.003316202
6165615	58	9	1968	-71.6070436	43.3742607	0.038695629	54	1648.418355	0.005448068
6165616	60	23	1968	-104.8270959	33.0896297	0.038883559	25	1288.916131	0.004458386
6165617	61	2	1968	-72.7986209	40.8644157	0.032836877	42	1484.010919	0.004570026
6165618	60	15	1968	-106.6750109	34.7961467	0.031876822	31	1396.633311	0.003137962
6165619	58	18	1968	-71.7063079	44.1798777	0.066101642	80	1841.62952	0.010793873
6165620	61	5	1968	-73.2277839	40.7992357	0.038287829	41	1279.294893	0.00498718
6165621	59	8	1968	-74.8571779	39.9721857	0.026674861	44	1608.262821	0.003475058
6165622	60	17	1968	-104.2297055	34.1098564	0.027113768	26	1221.179328	0.003252294
6165624	60	22	1968	-105.8493706	33.6891907	0.040463158	35	1330.582723	0.005812397
6165625	59	9	1968	-74.9255249	39.4166137	0.032006952	41	1390.287943	0.004407401
6165626	61	12	1968	-74.0071189	41.8019497	0.036909343	53	1588.610428	0.005119723
6165627	61	15	1968	-74.5049339	41.4526297	0.038717073	54	1763.360532	0.005870342
6165628	60	25	1968	-108.1067589	32.3245289	0.038238737	28	1105.449989	0.006225736
6165629	59	19	1968	-74.7967659	41.1181687	0.025687809	39	1376.98571	0.00318989
6165630	61	17	1968	-73.3039629	42.7275747	0.045035861	72	1668.057639	0.008164426
6165631	61	14	1968	-74.329198	41.985822	0.045941619	61	1568.612054	0.007622149
6165632	60	2	1968	-107.7013619	36.1676097	0.048261746	22	910.8926779	0.005880527
6165633	61	20	1968	-73.8449109	42.9277137	0.044569319	63	1955.286168	0.005544121
6165634	52	28	1968	-92.5567869	39.4294496	0.037181054	50	1624.574403	0.004653099
6165635	61	16	1968	-73.4115969	42.3497047	0.039288769	64	1820.590515	0.006771253
6165636	61	22	1968	-74.1520169	42.4363317	0.038801147	54	1706.797317	0.004912472
6165637	60	7	1968	-108.0570609	35.7834627	0.014007578	15	668.7185608	0.001362885
6165638	61	25	1968	-74.4021599	42.6548767	0.036424594	53	1589.235933	0.004750292
6165639	53	39	1968	-110.7878949	45.5761407	0.04503525	58	1679.127631	0.006758202
6165640	61	23	1968	-74.8633269	42.6609927	0.025948664	40	1425.826884	0.003145086
6165641	60	20	1968	-107.3217132	33.749487	0.068461397	42	1466.660617	0.007830068
6165643	61	24	1968	-74.927578	42.386341	0.030620263	49	1457.910771	0.004369721
6165644	60	26	1968	-107.8333333	32.3333333	0.055542906	30	1263.688236	0.006352402
6165645	61	35	1968	-75.468728	42.903801	0.031086454	52	1716.252737	0.004304937
6165646	53	43	1968	-106.4290921	45.8279275	0.025422489	40	1324.961093	0.003949092
6165647	61	33	1968	-75.8032509	42.0123327	0.047988637	68	1789.595397	0.007630165
6165648	61	1	1968	-72.634109	40.797702	0.036289566	52	1907.53334	0.004539725
6165649	61	44	1968	-76.036148	42.036872	0.03189734	50	1377.498243	0.004947359
6165650	53	44	1968	-105.4130672	45.9440787	0.014420553	18	857.5526703	0.001714664
6165651	61	34	1968	-75.0998799	42.4378997	0.040167108	66	1733.408473	0.006345417
6165652	61	6	1968	-73.639499	41.217092	0.036108303	54	1608.119788	0.005673195
6165653	61	54	1968	-78.6967019	42.9562967	0.040583026	61	1869.341724	0.005227016
6165654	54	19	1968	-99.7141019	41.1189127	0.014246474	24	899.3868252	0.001548308
6165655	61	56	1968	-78.8989789	42.2769437	0.038164515	54	1646.298577	0.004953766
6165656	61	10	1968	-74.3923049	41.2736877	0.036356679	51	1582.6974	0.005261833
6165657	61	45	1968	-77.939947	42.282132	0.045110617	68	2036.1268	0.00672816
6165658	55	18	1968	-114.4976522	39.2075029	0.028251955	25	1033.307745	0.003023916
6165659	61	63	1968	-79.033047	42.501182	0.053053069	67	1997.868386	0.006588386
6165660	61	47	1968	-77.118887	42.904651	0.039389087	57	1724.479652	0.004662178
6165661	61	11	1968	-74.4140959	41.3812217	0.033139462	48	1474.107557	0.004518979
6165662	56	9	1968	-66.51451	47.40475	0.045587162	65	1572.801763	0.008558119
6165663	61	64	1968	-78.8506549	43.0697617	0.032672529	43	1578.391363	0.003098232
6165664	61	13	1968	-74.5802369	41.5334407	0.039436287	60	1773.315744	0.005682837
6165665	56	18	1968	-67.5403	46.35704	0.042006597	64	1818.513549	0.005639691
6165666	61	55	1968	-78.178397	42.619592	0.040893087	57	1848.311532	0.005308844
6165667	61	68	1968	-77.4844579	43.1820467	0.032827169	52	1622.085602	0.004213793
6165668	56	41	1968	-65.79995	45.63438	0.055897176	80	2176.313253	0.008761441
6165669	61	21	1968	-74.1783949	42.3989107	0.035990336	60	1687.052604	0.005811025
6165670	61	57	1968	-78.3611669	42.5957057	0.031775397	55	1493.413656	0.005731257
6165671	61	74	1968	-75.2973269	43.3924887	0.029890039	39	1232.829243	0.003516049
6165672	58	1	1968	-71.8661202	42.9015085	0.033467541	56	1459.703087	0.005443306
6165673	61	26	1968	-74.1951349	42.7318997	0.037548481	53	1618.424402	0.004455034
6165674	61	62	1968	-79.4116839	41.9986107	0.042630712	66	1947.087458	0.006020556
6165675	61	86	1968	-74.226128	43.371341	0.052403468	69	1396.159281	0.009031305
6165676	58	6	1968	-71.2880123	43.1980043	0.037738742	54	1454.149148	0.00587572
6165677	61	89	1968	-73.312309	43.199431	0.036669452	61	1874.644598	0.005220259
6165678	61	31	1968	-75.5570359	42.3180237	0.040316655	62	1578.964868	0.006494796
6165679	61	65	1968	-79.0022969	43.2572547	0.030467197	49	1595.024035	0.003795418
6165680	58	7	1968	-71.6191959	43.2494327	0.036171283	60	1514.89406	0.006016801
6165681	61	90	1968	-73.409239	43.217821	0.045769305	60	1746.602348	0.005718153
6165682	61	72	1968	-76.110868	43.651181	0.032417291	51	1498.343159	0.005388728
6165683	61	48	1968	-77.2581629	42.7793497	0.028383821	44	1476.361596	0.003213548
6165684	58	11	1968	-71.8805982	43.4568165	0.028384427	47	1229.392827	0.004957691
6165685	68	15	1968	-77.00984	44.35414	0.054672419	63	2330.07515	0.005243401
6165686	61	49	1968	-77.225107	42.665781	0.036651827	54	1599.638591	0.004821784
6165687	61	75	1968	-75.9023929	43.4558097	0.03958075	63	1571.684374	0.006165046
6165688	58	16	1968	-71.35	44.1166667	0.058653535	62	1575.081154	0.022791048
6165689	68	17	1968	-78.13916	44.5673	0.065344968	81	2180.837682	0.009995228
6165690	58	17	1968	-71.3885019	44.3571867	0.041999625	63	1267.031053	0.008235058
6165691	61	58	1968	-78.103787	42.624922	0.037882875	58	1960.387758	0.004417812
6165692	61	88	1968	-74.0622389	43.6884937	0.03789514	56	1509.576493	0.006580348
6165693	68	22	1968	-81.23315	44.3202	0.0219909	35	1054.225368	0.002554968
6165694	58	20	1968	-71.5868762	44.6832807	0.033721711	57	1514.900549	0.005260608
6165695	68	129	1968	-82.24228	42.71393	0.027326522	36	1421.389403	0.002613869
6165696	61	91	1968	-73.5108119	43.0332427	0.04422006	68	1936.228998	0.006173166
6165697	61	59	1968	-78.9408579	42.0548007	0.042411187	62	1589.046649	0.006919998
6165698	58	21	1968	-71.3006396	44.8672811	0.046001803	62	1704.164064	0.007167566
6165699	68	32	1968	-91.47084	48.70389	0.045955746	63	1764.599192	0.008588075
6165700	61	169	1968	-76.680291	43.265073	0.040772448	60	1871.7795	0.005678325
6165701	68	114	1968	-77.37166	44.0782	0.044745766	54	1909.033582	0.004635754
6165702	58	22	1968	-71.3746691	44.9972951	0.046423004	61	1485.278066	0.007228255
6165703	69	4	1968	-120.7024989	45.4462537	0.016340473	22	1013.76586	0.00149247
6165704	61	78	1968	-75.0230329	43.4738997	0.056230594	71	1684.013212	0.008643086
6165705	68	116	1968	-78.38749	44.20486	0.05879372	74	2147.261224	0.00656395
6165706	59	1	1968	-75.1462189	39.8314157	0.047536449	56	1745.500002	0.005693321
6165707	72	4	1968	-80.3204561	41.7146604	0.043422339	63	1856.060498	0.006383858
6165708	59	6	1968	-74.9720939	39.7769177	0.044178835	57	1854.403546	0.00640338
6165709	61	79	1968	-75.6687119	43.1192707	0.037644113	61	1640.970354	0.005716228
6165710	68	23	1968	-74.96719	45.17213	0.04603042	57	1940.045043	0.0046093
6165711	72	6	1968	-79.3470999	41.5335247	0.037032393	54	1485.527324	0.006262996
6165712	59	7	1968	-74.8443379	39.6956577	0.040547745	48	1486.985997	0.005492736
6165713	72	11	1968	-79.8330619	41.0473847	0.047470953	61	1638.188252	0.006432921
6165714	61	85	1968	-74.3975289	43.5654587	0.045340315	59	1199.241568	0.00812655
6165715	68	24	1968	-75.2704	45.40365	0.042001683	55	1678.250105	0.004520029
6165716	60	9	1968	-106.0592719	35.5233697	0.03181298	28	1213.765736	0.003655142
6165717	72	16	1968	-78.8505629	41.5603287	0.029204508	52	1126.760794	0.005697312
6165718	68	18	1968	-79.64115	44.72102	0.040537628	55	1640.757301	0.005345619
6165719	68	33	1968	-80.15643	48.30531	0.039058611	47	1429.041125	0.00518884
6165720	60	18	1968	-103.7367849	34.0200567	0.019035289	16	908.8479116	0.002431939
6165721	61	8	1968	-73.924448	41.962831	0.042121245	69	1968.723707	0.006709693
6165722	68	19	1968	-79.18866	44.33724	0.034746994	57	1818.882415	0.004812757
6165723	68	34	1968	-89.9916	48.23844	0.044796219	59	1487.414662	0.008326367
6165724	61	9	1968	-73.989448	41.749942	0.034245424	51	1514.643148	0.004834716
6165725	61	18	1968	-73.9939669	42.3521387	0.037987106	55	1529.373176	0.005720904
6165726	69	2	1968	-122.7875574	45.3836599	0.043908236	42	1396.97785	0.006507146
6165727	68	28	1968	-79.79383	45.21508	0.052283709	67	1807.284859	0.009173424
6165728	61	19	1968	-73.676619	42.320431	0.037016611	60	1715.888173	0.005273689
6165729	61	28	1968	-74.127738	42.180541	0.036525515	54	1501.44605	0.005006994
6165730	69	22	1968	-119.696796	43.3390029	0.022708204	19	762.7306024	0.002436997
6165731	68	38	1968	-80.38245	45.61226	0.046030578	63	1402.900907	0.009170429
6165732	61	38	1968	-76.0044449	42.3591667	0.041328758	60	1895.85664	0.005180796
6165733	61	40	1968	-76.8217859	42.7411737	0.034874259	51	1651.496792	0.004739109
6165734	72	5	1968	-79.9582379	41.8051937	0.032321491	47	1558.685091	0.003866683
6165735	68	40	1968	-80.49401	46.10466	0.036894171	52	1772.198565	0.004581689
6165736	61	41	1968	-76.2599639	42.5202627	0.039888721	62	1802.961457	0.005638905
6165737	61	43	1968	-76.6333469	42.5515907	0.029903122	49	1396.811535	0.00426029
6165738	61	46	1968	-77.8406359	42.5032347	0.039781153	61	1652.634726	0.006700029
6165739	72	7	1968	-79.1302659	41.9993537	0.042939738	57	1852.90639	0.00553737
6165740	68	41	1968	-81.0744	46.46614	0.040329157	63	1818.490714	0.005845955
6165741	61	50	1968	-77.591937	42.711382	0.032044514	52	1542.125125	0.004798774
6165742	61	51	1968	-77.5572209	42.9708677	0.025788003	36	1395.998697	0.002817114
6165743	72	17	1968	-78.7387779	41.4207597	0.023104756	42	1114.616432	0.003641777
6165744	68	42	1968	-83.2666667	46.4666667	0.050541674	64	1887.697441	0.008425133
6165745	61	53	1968	-78.8216099	42.6805707	0.032236372	48	1467.950638	0.003866204
6165746	61	61	1968	-79.259007	42.501632	0.045474504	59	1646.196104	0.006576008
6165747	72	29	1968	-76.6638159	41.3121387	0.041066004	42	1517.920821	0.004678132
6165748	69	8	1968	-116.7795945	45.72192	0.028238505	38	1351.377105	0.003861401
6165749	61	66	1968	-78.1154029	43.1496467	0.036511189	50	1869.96777	0.003741677
6165750	61	67	1968	-77.962347	43.167391	0.042496735	57	1841.387793	0.004821685
6165751	72	30	1968	-76.903319	41.8749574	0.035856361	54	1706.444231	0.004599986
6165752	69	9	1968	-123.8027616	44.5508867	0.12764574	44	1407.758994	0.011128704
6165753	61	70	1968	-76.0264589	43.1693497	0.039635598	59	1722.120607	0.005647567
6165754	61	71	1968	-76.0454869	44.0000587	0.02980589	49	1357.534351	0.004329225
6165755	61	76	1968	-75.5571819	43.6286487	0.032581302	39	1018.785712	0.005442439
6165756	72	37	1968	-75.3893569	41.1159967	0.039937497	58	1519.580462	0.0066676
6165757	61	77	1968	-75.1690839	43.7262817	0.035331701	63	1600.367579	0.006081186
6165758	72	51	1968	-79.6681819	40.4687597	0.02235294	34	1046.428675	0.003119648
6165759	72	54	1968	-79.2349941	40.6673234	0.029005435	42	1116.128191	0.004955125
6165760	61	92	1968	-73.7371009	43.6098217	0.04310429	68	1391.132737	0.008133924
6165761	72	66	1968	-77.7806249	40.4152277	0.038480076	52	1553.597451	0.005820998
6165762	61	93	1968	-73.7953919	43.5327757	0.04332495	54	1350.034546	0.007074831
6165763	72	68	1968	-77.6852029	40.3760787	0.040718626	60	1816.723297	0.006219317
6165764	68	10	1968	-81.5323	43.77228	0.038037471	54	1620.989644	0.005056348
6165765	68	11	1968	-75.58905	44.94773	0.040607276	57	1747.797908	0.004340331
6165766	68	12	1968	-76.7748	44.26177	0.043807	53	1989.261039	0.003829757
6165767	68	13	1968	-76.27372	44.79355	0.039163789	49	1849.444895	0.00382747
6165768	68	20	1968	-80.74133	44.593	0.035714142	55	1579.616917	0.004810909
6165769	68	25	1968	-76.91573	45.56464	0.044503536	59	1822.446492	0.005323605
6165770	68	26	1968	-77.74688	45.50222	0.052650458	69	1817.865677	0.008072077
6165771	68	27	1968	-78.81472	45.26464	0.042503971	57	1490.866846	0.007356095
6165772	68	31	1968	-93.09186	49.85182	0.036811845	49	1459.594341	0.005452321
6165773	68	37	1968	-81.73699	45.78934	0.037997559	57	1890.729666	0.005227642
6165774	69	1	1968	-123.3149615	45.76385	0.050213208	43	1321.074511	0.007353739
6165775	69	3	1968	-121.9218136	45.0787281	0.047649167	31	993.4475604	0.009389366
6165776	69	6	1968	-118.9095229	45.2238277	0.039134187	42	1449.167861	0.005688738
6165777	69	10	1968	-122.2280527	44.4740348	0.064532655	43	1213.265803	0.011729701
6165778	69	11	1968	-121.2737049	44.1598087	0.031270848	33	1261.219113	0.004014378
6165779	69	20	1968	-121.6686709	43.5640747	0.058379394	45	1409.50481	0.007595756
6165780	69	27	1968	-122.7083359	42.5805007	0.059537737	57	1944.031366	0.012187352
6165781	69	31	1968	-118.6488892	42.34767	0.027056564	32	1300.3502	0.00311038
6166444	69	18	1968	-123.5037309	43.3663377	0.053421827	56	1752.248026	0.007912724
6166446	69	19	1968	-122.5593339	43.9074737	0.085176414	65	1847.851015	0.011726071
6166449	72	10	1968	-79.0433273	41.6359508	0.038348436	57	1600.626967	0.005818908
6166451	72	13	1968	-78.0649572	41.1631773	0.024220339	40	1016.548487	0.004040783
6166452	72	21	1968	-77.2415709	41.2725507	0.031400434	50	1513.448199	0.00437684
6166455	72	24	1968	-77.4017208	41.8772966	0.018947142	37	1146.87507	0.002875584
6166457	72	48	1968	-80.3260179	40.0771657	0.028234505	40	1474.363159	0.003234065
6166458	72	26	1968	-77.2776099	41.4526027	0.031106052	41	1339.591528	0.003803536
6166460	72	49	1968	-79.2376019	40.6243617	0.033117034	46	1457.616121	0.00460136
6166461	72	38	1968	-75.7927799	41.7057127	0.044642385	65	1678.310767	0.006890229
6166463	72	86	1968	-75.3435909	40.8040057	0.039995114	57	1919.146137	0.004881089
6166465	72	70	1968	-77.0638289	40.0572077	0.034173508	52	1546.393178	0.004848456
6166466	72	87	1968	-75.9947369	40.6352357	0.041017714	57	1765.4637	0.005470473
6166468	72	77	1968	-76.4352239	40.2784227	0.045518399	49	1746.217646	0.0048475
6166470	72	88	1968	-80.0595075	39.9302972	0.05574462	66	1839.99552	0.008430726
6166471	72	83	1968	-75.9610008	40.7874732	0.028738692	47	1333.424208	0.004489767
6166472	72	85	1968	-75.9991309	40.6899507	0.027605037	49	1400.75636	0.00495995
6166473	72	89	1968	-79.4499739	39.9992837	0.041557522	55	1523.346938	0.006443395
6166474	75	1	1968	-63.99116	47.01855	0.02767278	48	1608.972381	0.007830247
6166475	72	96	1968	-76.8886949	39.9221277	0.045768784	51	1625.973748	0.005444267
6166476	75	13	1968	-63.1498	46.36766	0.031999495	41	1278.820492	0.004349973
6166477	75	5	1968	-62.36825	46.31964	0.030544406	37	1221.691468	0.003600309
6166478	76	4	1968	-73.33089	45.08068	0.039598162	53	1885.46681	0.004396604
6166479	76	2	1968	-75.54197	45.70991	0.049582558	67	1986.782509	0.006596326
6166480	76	6	1968	-74.09216	45.78486	0.042789209	60	1727.6689	0.005661575
6166481	76	7	1968	-74.1781	45.42771	0.033578345	56	1692.735249	0.004560588
6166483	76	17	1968	-73.77079	46.70181	0.038074629	53	1380.752631	0.005944843
6166485	76	21	1968	-71.56199	46.6642	0.028364853	46	1421.491225	0.003524271
6166486	80	4	1968	-79.4348459	33.6458617	0.038081535	41	1472.58902	0.005041631
6166487	76	58	1968	-70.419	48.42993	0.040629045	50	1243.74961	0.006281119
6166488	80	6	1968	-79.7849141	34.0240154	0.048463851	49	1447.925156	0.006742751
6166489	77	1	1968	-71.4546814	41.6039129	0.03562013	50	1323.794552	0.005697337
6166490	80	14	1968	-81.4124759	34.1960217	0.045025435	54	1701.973846	0.006645931
6166491	80	16	1968	-82.6769029	34.7060587	0.041111124	44	1478.526075	0.004974286
6166492	79	14	1968	-105.39733	50.33853	0.069055865	54	1696.200796	0.00661483
6166493	81	4	1968	-98.6458819	43.8312097	0.057774806	46	1711.210781	0.005373828
6166494	80	1	1968	-80.1081539	32.7927447	0.119075567	64	2141.941411	0.018592314
6166495	81	5	1968	-98.7072332	43.1834022	0.037045627	36	1550.090653	0.003128109
6166496	81	7	1968	-99.8703379	43.3137817	0.027963615	31	1265.805313	0.002652837
6166497	80	8	1968	-81.4906299	33.6937497	0.062850996	57	1845.431297	0.008225802
6166498	81	14	1968	-98.4322579	44.0386067	0.042389489	41	1468.392171	0.004273917
6166499	81	15	1968	-99.2503172	44.121783	0.044952735	39	1464.848811	0.004726062
6166500	80	18	1968	-83.2805093	34.6616003	0.041392232	46	1390.592625	0.00536303
6166501	81	16	1968	-99.5004818	44.1738082	0.056136344	42	1655.81753	0.005059853
6166502	81	6	1968	-99.3437499	43.9043437	0.065466398	58	2071.892502	0.007286872
6166503	81	26	1968	-102.5874329	44.0210147	0.036381433	33	1437.452017	0.003365816
6166504	81	27	1968	-103.6533359	44.2081337	0.033153557	35	1328.748579	0.003375702
6166505	81	9	1968	-102.5111319	43.6550387	0.021618623	32	1089.174568	0.002865948
6166506	81	31	1968	-103.7823662	45.2341239	0.03943545	32	1261.373617	0.003499089
6166507	81	10	1968	-96.9486732	44.2320836	0.034482264	45	1528.427857	0.00352593
6166508	82	4	1968	-89.3824309	35.5377957	0.03498413	42	1480.38643	0.004618659
6166509	82	6	1968	-89.0787139	35.3612207	0.04639444	48	1769.135828	0.005807237
6166510	81	20	1968	-98.8284656	45.9390434	0.039034611	41	1616.754133	0.004259178
6166511	82	7	1968	-88.0066271	36.3584295	0.039953984	49	1445.672086	0.005863163
6166512	82	9	1968	-88.5485594	35.4115013	0.040617896	44	1662.330647	0.004964584
6166513	81	29	1968	-103.640174	43.8204584	0.019834699	33	985.7778604	0.003360323
6166514	82	14	1968	-87.6933829	36.5004837	0.050231993	57	1768.592403	0.006713317
6166515	81	30	1968	-101.3067249	44.2125557	0.055827132	40	1520.897371	0.004546656
6166516	82	15	1968	-87.6852374	35.1607149	0.056947922	65	2007.468998	0.008244121
6166517	82	16	1968	-87.3276749	35.8791357	0.060648113	67	2013.6648	0.009194587
6166518	81	32	1968	-101.9591186	43.7410071	0.036891278	37	1390.179497	0.003679443
6166519	82	17	1968	-87.1440788	35.3492078	0.048018895	58	1879.499029	0.006447797
6166520	81	35	1968	-102.5581808	45.1458023	0.025720554	27	1021.966414	0.002855109
6166521	82	24	1968	-86.2170779	35.3582118	0.055861157	63	1908.535242	0.007999373
6166522	82	26	1968	-85.6700349	36.5041157	0.05890459	66	2058.349996	0.007833209
6166523	82	3	1968	-89.3754293	35.0517759	0.031557236	38	1276.797937	0.003849005
6166524	82	27	1968	-85.9158515	35.3801394	0.037593536	46	1570.285483	0.004566018
6166525	82	32	1968	-84.3613059	36.2936637	0.058780546	65	1625.825807	0.008996913
6166526	82	5	1968	-89.334166	35.6893173	0.041250876	48	1888.743677	0.004638817
6166527	82	34	1968	-84.3482669	36.0487507	0.058257574	66	1841.700498	0.008167783
6166528	82	13	1968	-86.9969029	36.1745577	0.055740177	65	2155.030232	0.007698111
6166529	82	35	1968	-84.3834619	35.1735497	0.040015814	44	1220.139364	0.006552652
6166530	82	37	1968	-83.7710499	36.1388087	0.049538145	58	1872.506213	0.006248069
6166531	82	18	1968	-87.6791989	35.4941757	0.061956835	65	1872.459544	0.009354486
6166532	83	6	1968	-97.4706489	27.6881977	0.04479875	34	1581.859247	0.00494139
6166533	82	21	1968	-86.6657259	35.3350377	0.043144496	50	1675.720288	0.005688745
6166534	83	7	1968	-98.8220264	27.0738442	0.077610678	41	1458.27147	0.007381505
6166535	82	23	1968	-86.1676666	35.7357596	0.046368959	56	1829.455986	0.006080423
6166536	83	15	1968	-97.9666688	28.9215455	0.070931303	39	1671.97032	0.00697949
6166537	82	28	1968	-85.2816399	35.1334457	0.043403483	52	1505.39987	0.006020928
6166538	83	16	1968	-98.3175579	28.2807187	0.086570482	42	1550.51108	0.008130175
6166539	83	24	1968	-96.9354075	29.0185167	0.031099234	21	1121.430185	0.002840416
6166541	83	27	1968	-97.7494969	29.8219637	0.029434142	31	1350.387239	0.004103378
6166542	83	35	1968	-95.8024839	30.7866757	0.061236649	54	1957.097912	0.006419868
6166543	82	33	1968	-84.1514213	35.9135129	0.039497058	49	1658.256054	0.004956441
6166544	83	49	1968	-96.5963949	31.4304618	0.02932384	33	1358.10691	0.003980913
6166545	82	36	1968	-84.783248	35.171428	0.04944827	55	1782.282841	0.006033562
6166546	83	57	1968	-94.1555047	32.4388568	0.054806401	45	1765.499419	0.005341552
6166547	83	58	1968	-95.7430805	32.1808084	0.049304434	52	1712.01325	0.007338805
6166548	82	38	1968	-83.5013209	36.1754317	0.041114396	55	1741.105369	0.005878374
6166549	83	59	1968	-95.5170809	32.2334897	0.065034523	61	2012.661175	0.008610172
6166550	83	2	1968	-98.135998	26.8901748	0.078274971	42	1637.149292	0.007937876
6166551	83	69	1968	-94.5044339	33.5678857	0.046176627	48	1549.772716	0.006534113
6166552	83	77	1968	-98.2913439	33.6772857	0.0305055	21	1142.139184	0.00258921
6166553	83	4	1968	-99.2716219	26.9073677	0.076044132	48	1760.353595	0.0099727
6166554	83	78	1968	-99.1899265	33.9054886	0.033415228	23	1096.382317	0.002917121
6166555	83	20	1968	-94.3415601	29.6706502	0.044727356	34	1533.858877	0.006376524
6166556	85	11	1968	-111.9543769	39.9004437	0.026831523	33	1573.478218	0.002500945
6166557	85	12	1968	-110.5606389	39.5972957	0.017872515	14	566.788073	0.001542766
6166558	85	20	1968	-112.7998329	37.4140427	0.052805277	39	1575.451398	0.006609934
6166559	83	22	1968	-95.2442265	29.1267731	0.029717668	31	1531.722817	0.00390584
6166560	83	29	1968	-97.9801349	29.2751357	0.0585381	39	1654.799451	0.007374453
6166561	83	32	1968	-94.0899029	30.7962929	0.048407893	49	1816.438334	0.006525622
6166562	83	37	1968	-96.1971439	30.5287897	0.039150223	40	1557.841149	0.004606612
6166563	83	39	1968	-97.6537479	30.6618397	0.023188657	28	1366.355254	0.003210291
6166564	83	44	1968	-94.8143346	31.2015816	0.059806062	57	1824.282044	0.007850377
6166565	83	64	1968	-98.0495578	32.1649434	0.040141086	37	1593.063458	0.006237585
6166567	83	74	1968	-97.460791	33.0581596	0.028528902	35	1538.816693	0.00391663
6166568	83	81	1968	-101.2407759	29.9214837	0.037740708	31	1265.962219	0.005079704
6166570	83	86	1968	-101.9691922	31.2059844	0.036030825	33	1341.181651	0.004901268
6166571	83	88	1968	-103.4483656	30.2861238	0.070701091	38	1501.937173	0.007092221
6166573	83	91	1968	-105.3687429	31.7612467	0.044548041	26	1344.025959	0.00424934
6166575	88	2	1968	-77.5849759	39.2649107	0.040254008	52	1674.224104	0.005061535
6166576	88	9	1968	-77.2851029	38.9966467	0.030465557	43	1281.8226	0.004225439
6166578	88	12	1968	-77.5897828	38.6248921	0.045830443	56	1755.576177	0.00614315
6166580	88	19	1968	-79.2389683	37.6105326	0.029896322	45	1389.124902	0.004704299
6166581	88	20	1968	-79.2990119	37.5332587	0.049758769	61	1875.665902	0.006864855
6166583	88	22	1968	-78.5422838	37.9095168	0.048635545	61	1934.412386	0.006894388
6166584	88	29	1968	-76.341428	37.6595013	0.052233084	63	2013.025854	0.007793408
6166586	88	32	1968	-75.7320849	37.5482647	0.083843544	54	1779.592236	0.014519763
6166588	88	44	1968	-77.2865338	36.5960851	0.046922038	45	1444.003594	0.006107352
6166609	85	21	1968	-111.1870049	37.9276397	0.015245718	10	430.4995728	0.001365924
6166611	87	1	1968	-72.6842749	42.8198757	0.03525998	56	1583.229594	0.005904788
6166612	72	71	1968	-77.8942099	40.6956947	0.043161556	56	1605.951267	0.006300557
6166613	87	2	1968	-73.2805777	42.8089741	0.030019287	51	1476.111479	0.004690804
6166614	72	92	1968	-78.2188889	39.8296047	0.037684796	53	1711.580262	0.004935446
6166615	87	3	1968	-72.9535464	43.0451274	0.04297403	56	1571.491177	0.007046307
6166616	72	94	1968	-77.4456949	39.9854797	0.029677042	41	1392.097349	0.003676053
6166617	87	10	1968	-73.0950522	43.6132776	0.037156746	59	1708.03457	0.005453086
6166618	75	9	1968	-63.52906	46.22164	0.028778269	39	1340.236941	0.004942342
6166619	87	12	1968	-71.8536769	44.6832207	0.051056621	61	1530.028577	0.007777596
6166620	76	1	1968	-76.11098	45.55411	0.049332217	71	2037.939947	0.006959976
6166621	87	20	1968	-72.7821029	44.7283887	0.033524781	43	1056.446158	0.00531887
6166622	76	23	1968	-70.93779	46.51041	0.041783732	54	1674.731838	0.005553065
6166624	76	55	1968	-71.45458	48.84299	0.035105478	48	1231.630111	0.005352409
6166625	87	23	1968	-73.2760665	44.7616696	0.02683104	45	1320.581975	0.004083286
6166626	80	2	1968	-79.6942904	33.2862522	0.069387011	51	1667.164052	0.008909813
6166627	88	3	1968	-79.4594489	38.2891547	0.053577627	60	1595.637871	0.008365572
6166628	80	9	1968	-81.3572843	33.7228886	0.075008429	63	2034.338955	0.009461026
6166629	88	38	1968	-80.9639369	36.8381177	0.0390677	53	1647.71305	0.005730779
6166630	80	12	1968	-80.5795979	34.1121757	0.058121866	59	2021.755757	0.007892871
6166631	88	43	1968	-77.1454409	36.6057147	0.03784747	49	1565.968663	0.005371352
6166632	80	19	1968	-81.9796069	35.0827867	0.035934094	40	1276.567881	0.004960507
6166633	90	20	1968	-81.9661949	38.2174027	0.057161047	63	1797.013619	0.008568035
6166634	81	1	1968	-96.8856776	43.3306215	0.025986457	34	1304.536017	0.002813347
6166635	81	8	1968	-100.8980976	43.2008645	0.045580559	43	1650.225624	0.004551555
6166636	90	44	1968	-79.8489868	39.5730496	0.043174544	55	1406.240245	0.007305777
6166637	81	11	1968	-97.9423379	44.9067977	0.048686978	55	1820.708663	0.005578682
6166639	81	13	1968	-98.3160719	44.5010807	0.03315602	35	1376.469447	0.003461865
6166641	81	18	1968	-97.3322679	45.8489747	0.027809861	38	1239.868838	0.00379816
6166643	81	21	1968	-98.2072749	45.1555417	0.051150179	46	1686.055721	0.005383178
6166645	81	28	1968	-103.1333309	44.5118757	0.046109219	49	1876.359202	0.003813431
6166647	81	33	1968	-100.4910279	44.3862037	0.027304174	29	1265.454828	0.002807335
6166649	82	2	1968	-89.3646928	36.3065622	0.045869644	37	1459.015558	0.004656725
6166651	82	10	1968	-88.8148959	35.3431047	0.043857427	48	1661.317805	0.005246744
6166653	82	12	1968	-88.8621969	35.8134197	0.045860562	50	1700.984768	0.005478308
6166655	82	19	1968	-86.3315439	36.3259217	0.053167236	60	1837.607171	0.007010757
6166657	82	20	1968	-86.6658089	36.5086597	0.043991915	51	1864.226773	0.00561482
6166659	82	22	1968	-86.8259959	35.8589627	0.03858129	52	1774.215009	0.005313293
6166661	82	29	1968	-85.6693511	35.1735485	0.051093661	58	1752.460441	0.006984723
6166663	82	30	1968	-85.1467589	35.2998357	0.038862467	49	1464.736031	0.005413253
6166665	82	39	1968	-83.8099149	35.7304657	0.061885823	67	1996.000006	0.00863504
6166667	83	11	1968	-95.6139832	28.9083337	0.07345857	44	1990.777226	0.00589547
6166669	83	21	1968	-94.4007057	29.7343527	0.032881042	33	1528.798047	0.003892175
6166671	83	23	1968	-95.831598	29.7863554	0.034149244	38	1694.794696	0.004227327
6166673	83	63	1968	-97.7298261	32.6900934	0.033051576	35	1499.598731	0.004036616
6166675	83	65	1968	-98.389974	32.9898499	0.041774759	42	1585.342975	0.006425451
6166677	83	75	1968	-97.2713009	33.5610847	0.037509166	45	1609.552679	0.005219145
6166679	83	82	1968	-103.0065204	29.1904253	0.119087067	34	1413.60819	0.009576114
6166681	83	87	1968	-102.4086864	30.1465918	0.087710577	42	1570.9889	0.011195094
6166683	83	97	1968	-102.2361909	34.2015977	0.019837095	21	852.6013964	0.002392922
6166685	83	99	1968	-106.1128934	31.5280023	0.054474201	17	928.1118713	0.003468645
6166687	83	100	1968	-102.249269	35.7506355	0.059087709	43	1607.303776	0.006407508
6166689	85	7	1968	-110.3986589	40.4806637	0.024083426	13	532.9138273	0.004608709
6166691	85	15	1968	-112.6462479	38.2041397	0.033542064	32	1196.749397	0.004591547
6166693	87	5	1968	-72.5853589	43.4717157	0.051514266	64	1448.02079	0.008592612
6166695	87	8	1968	-73.1953659	43.0090337	0.034801398	55	1589.388699	0.005478563
6166697	87	15	1968	-72.4028527	44.3378666	0.038004211	57	1506.570671	0.006148381
6166699	87	17	1968	-72.3791513	44.5503853	0.032948441	52	1378.40533	0.005054205
6166702	88	7	1968	-78.5638129	38.8163337	0.037179886	49	1630.100294	0.005324387
6166704	88	21	1968	-78.6894059	37.8976577	0.04744837	62	1694.629544	0.007581269
6166705	88	28	1968	-77.6223439	37.2171627	0.046580899	56	1770.094822	0.007043572
6166707	88	34	1968	-82.8230979	36.6848357	0.039114057	46	1507.706258	0.004834226
6166709	88	45	1968	-76.0845349	36.6122367	0.046735912	54	1792.579106	0.006940404
6166711	89	10	1968	-123.0994489	47.1305417	0.048316963	50	1634.79094	0.008946046
6166713	89	12	1968	-121.4987559	47.8578067	0.060239343	36	1198.232028	0.006382565
6166715	89	19	1968	-121.3902819	46.6387037	0.054987522	47	1356.612591	0.007474339
6166717	89	22	1968	-118.8255839	46.4294877	0.017035935	25	1072.000845	0.002089324
6166719	90	12	1968	-82.0947269	38.7324167	0.038052105	49	1662.159468	0.005284777
6166728	89	3	1968	-122.3354259	48.1631507	0.047297343	50	1626.670029	0.009587664
6166733	89	13	1968	-120.3552169	47.7506157	0.025542166	37	1311.844083	0.004542929
6166735	89	18	1968	-122.3448409	46.0083647	0.042561288	36	1267.436725	0.00676461
6166737	89	21	1968	-119.9901579	46.0599687	0.011093828	14	769.0327241	0.001298791
6166740	90	21	1968	-81.7243649	38.2356237	0.060512592	67	1896.71716	0.008459158
6166743	90	38	1968	-80.2029429	39.4199317	0.04363527	58	1564.313323	0.00680497
6166786	2	1	1968	-87.6041417	34.868688	0.055737932	60	1854.397038	0.006688375
6166789	2	6	1968	-86.6855493	34.5012877	0.053250501	53	1776.929209	0.006026291
6166791	2	8	1968	-85.7110414	34.0278089	0.058040081	59	1928.278382	0.007448335
6166794	2	11	1968	-85.7518379	33.6257237	0.043406349	50	1474.838203	0.006256247
6166800	2	21	1968	-87.8359539	32.2782397	0.046490413	46	1580.167887	0.006298181
6166803	2	24	1968	-86.2754989	32.1312407	0.053577547	51	1849.447458	0.006595429
6166806	2	26	1968	-86.1307777	32.5890245	0.035582266	41	1553.623601	0.004490215
6166809	2	31	1968	-85.2112631	31.0081277	0.077780724	47	1751.669765	0.006333722
6166811	2	34	1968	-86.6131969	31.4439507	0.036692187	37	1351.902507	0.004984966
6166813	2	36	1968	-87.2090516	31.7399574	0.069358112	60	1953.38714	0.00925703
6166816	2	40	1968	-88.1125479	30.2540327	0.18778536	57	2156.809188	0.021537438
6166819	4	7	1968	-111.84916	50.56388	0.081346234	52	1650.557202	0.007607783
6166822	4	22	1968	-114.47782	52.02799	0.039867367	55	1835.750444	0.005339125
6166825	6	2	1968	-112.0460509	36.7313947	0.053125396	33	1101.971276	0.007728475
6166826	6	5	1968	-109.4726859	36.5089267	0.031780618	25	1135.157868	0.003362729
6166829	72	8	1968	-79.9481349	41.7528857	0.038860752	60	1788.973862	0.005331278
6166830	6	15	1968	-111.4342499	34.8492047	0.114521214	71	2023.560892	0.019221295
6166833	6	32	1968	-110.7949529	31.5175977	0.106119668	47	1533.196749	0.013534967
6166834	72	53	1968	-79.7089598	40.9651065	0.03179212	45	1452.526342	0.004120431
6166837	7	3	1968	-92.5979989	33.9045937	0.083158037	62	1708.046694	0.010317341
6166838	72	64	1968	-78.1386279	40.5712157	0.039353309	51	1762.106669	0.005055476
6166841	7	4	1968	-92.6974039	33.5907857	0.054605884	51	1623.98035	0.007692527
6166842	72	65	1968	-77.4006569	40.3003687	0.031029502	46	1562.17492	0.004018811
6166845	7	6	1968	-93.6694105	33.6627163	0.061842285	59	2028.346414	0.007483902
6166846	72	72	1968	-77.3969039	40.5680517	0.035165994	51	1710.618845	0.004935841
6166849	7	14	1968	-93.0827549	34.6972007	0.052997585	59	1700.707437	0.007821466
6166853	7	24	1968	-94.3318236	35.3514159	0.051054703	55	1753.025631	0.006811298
6166854	72	80	1968	-76.3050619	40.2983537	0.042404817	56	1899.366147	0.005299409
6166858	72	93	1968	-77.2334519	39.9820157	0.036989764	46	1658.92981	0.004118708
6166862	76	38	1968	-71.34345	47.10777	0.054144692	54	1445.835346	0.020467005
6166866	76	39	1968	-70.62082	47.6483	0.030545667	38	850.4783524	0.004979345
6166870	76	54	1968	-72.84758	48.42804	0.035634968	41	1087.099054	0.005769603
6166873	76	56	1968	-71.52251	48.08672	0.041110966	47	1211.996048	0.006740201
6166876	79	13	1968	-104.92801	50.63258	0.057820322	63	2003.822736	0.006765048
6166880	79	16	1968	-107.73392	50.10608	0.030862424	30	1064.52996	0.003946247
6166884	80	3	1968	-81.0334581	32.2511024	0.074796708	51	1698.660685	0.007251735
6166888	81	2	1968	-97.8751124	43.284162	0.017959029	24	995.88866	0.001938238
6166892	81	12	1968	-97.6708995	44.0157709	0.040644782	38	1396.700571	0.003821866
6166896	82	1	1968	-89.4379279	36.4175101	0.043983083	52	1621.417494	0.005710722
6166900	82	11	1968	-88.9027887	35.9420253	0.034128398	41	1418.272943	0.004626018
6166903	82	40	1968	-83.9205469	35.9074137	0.041840527	50	1608.098747	0.005345472
6166907	82	41	1968	-82.9128272	36.0465477	0.045091216	53	1742.622575	0.005631206
6166912	82	42	1968	-82.077152	36.3180044	0.045804768	56	1339.977275	0.007347298
6166915	83	41	1968	-98.7351553	30.9594551	0.043527667	26	1225.543896	0.004740728
6166918	83	50	1968	-97.5983327	31.4977259	0.032854743	34	1450.134178	0.004729166
6166921	83	51	1968	-97.9068817	31.1829158	0.030787742	33	1365.531351	0.004542865
6166925	83	61	1968	-96.8055652	32.7295462	0.042611511	35	1435.299441	0.004329269
6166930	83	62	1968	-97.8146904	32.2930094	0.041100362	40	1638.107401	0.00609664
6166933	83	85	1968	-100.9172129	31.1844187	0.051689721	40	1497.344295	0.006991458
6166938	83	93	1968	-101.9652575	32.6620464	0.012288018	15	779.2215749	0.001882589
6166942	83	94	1968	-102.9569019	33.3441307	0.022242492	23	1067.3408	0.003111789
6166946	83	95	1968	-100.8301009	34.9337877	0.059152759	45	1711.093504	0.006265809
6166950	85	6	1968	-111.2812269	40.0466577	0.020629301	20	769.3293005	0.003704222
6166957	87	4	1968	-72.8507919	43.2885447	0.030012634	51	1433.025882	0.004799628
6166961	87	14	1968	-72.6267127	44.3174883	0.048177461	64	1455.161369	0.00840126
6166965	87	18	1968	-72.3458975	44.563679	0.043282515	64	1672.720246	0.006851591
6166969	87	19	1968	-72.8904029	44.6655427	0.022449692	37	1178.080985	0.003043573
6166971	88	5	1968	-78.5051729	38.5758867	0.04705031	62	1956.880692	0.006370648
6166975	88	16	1968	-80.6833109	37.0806077	0.03114626	46	1435.796417	0.00460293
6166979	88	17	1968	-79.873929	37.4881381	0.040214155	55	1525.340281	0.006061538
6166983	88	24	1968	-78.9826802	37.3326887	0.044869143	54	1577.611703	0.006560945
6166987	88	25	1968	-77.8286969	37.2478937	0.053891981	61	1711.998921	0.008668307
6166989	88	30	1968	-76.6789481	37.8800004	0.048072643	56	1687.385528	0.00678406
6166993	89	4	1968	-121.2122809	48.7004247	0.050284286	52	1556.118493	0.008656744
6166997	89	7	1968	-118.5401529	48.0542177	0.081801973	68	1817.361155	0.010720771
6167001	89	16	1968	-117.9280779	47.7305767	0.048378658	65	1964.041896	0.007322537
6167005	89	17	1968	-123.1780619	46.2603987	0.049244443	47	1525.142747	0.008226319
6167064	91	4	1968	-91.0900569	46.3087137	0.04133606	61	1659.00351	0.006923765
6167068	91	5	1968	-90.9468609	46.7999037	0.036836516	62	1576.62724	0.006331275
6167072	91	7	1968	-90.1542219	46.3414537	0.038268016	57	1476.190081	0.0068234
6167076	91	14	1968	-91.4793629	45.3129597	0.035723136	54	1732.335279	0.004519063
6167080	91	17	1968	-90.7920749	45.1410957	0.025242761	45	1073.789528	0.00396608
6167084	91	24	1968	-89.1549899	45.9284757	0.03208505	57	1349.697573	0.005984983
6167088	91	26	1968	-88.7750249	45.4638297	0.048684976	75	2119.874244	0.007324461
6167091	2	2	1968	-87.1912919	34.6386747	0.04600612	53	1611.582062	0.005976687
6167092	91	27	1968	-88.6286329	45.3745537	0.035518638	62	1370.911068	0.006876393
6167095	2	4	1968	-87.0592352	34.0297881	0.05189812	57	1788.496477	0.006907722
6167097	91	35	1968	-91.1258789	44.9295287	0.043170764	67	1864.443649	0.007156476
6167099	2	5	1968	-86.4934089	34.2016687	0.04838145	53	1669.574712	0.006606201
[truncated: 124,370 more rows]
